# Supplementary material for: The SP19 chronology for the South Pole Ice Core – Part 1: volcanic matching and annual layer counting
Source: Copernicus journal article supplement (doi:10.5194/cp-15-1793-2019), 2019-10-08
Supplement: Supplementary file 1 [file SP19_Data.xlsx]

## Sheet: Depth-Age Scale
Depth (m)	Age (Years Before 1950)	WD2014 Uncertainty (years)	Interpolation Uncertainty (years)	Total Uncertainty (years)
0	-65	0	3.417	3.417
0.196	-64	0	3.35	3.35
0.461	-63	0	3.283	3.283
0.674	-62	0	3.216	3.216
0.84	-61	0	3.149	3.149
1.053	-60	0	3.082	3.082
1.28	-59	0	3.015	3.015
1.508	-58	0	2.948	2.948
1.782	-57	0	2.881	2.881
1.901	-56	0	2.814	2.814
2.161	-55	1	2.747	2.92336
2.346	-54	1	2.68	2.86049
2.545	-53	1	2.613	2.79782
2.782	-52	1	2.546	2.73535
3.014	-51	1	2.479	2.6731
3.246	-50	1	2.412	2.61108
3.44	-49	1	2.345	2.54932
3.686	-48	1	2.278	2.48783
3.881	-47	1	2.211	2.42663
4.094	-46	1	2.144	2.36574
4.316	-45	1	2.077	2.3052
4.669	-44	1	2.01	2.24502
5.034	-43	1	1.943	2.18523
5.165	-42	0	1.876	1.876
5.325	-41	1	1.809	2.067
5.465	-40	1	1.742	2.00862
5.745	-39	1	1.675	1.9508
5.865	-38	1	1.608	1.89358
6.025	-37	1	1.541	1.83703
6.195	-36	1	1.474	1.7812
6.385	-35	1	1.407	1.72617
6.654	-34	1	1.34	1.672
6.874	-33	1	1.273	1.6188
7.059	-32	1	1.206	1.56666
7.209	-31	1	1.139	1.51569
7.459	-30	1	1.072	1.46601
7.665	-29	1	1.005	1.41775
7.894	-28	1	0.938	1.37107
8.054	-27	1	0.871	1.32614
8.219	-26	1	0.804	1.28313
8.324	-25	1	0.737	1.24224
8.539	-24	1	0.67	1.2037
8.716	-23	1	0.603	1.16774
8.868	-22	1	0.536	1.13459
9.063	-21	1	0.469	1.10452
9.253	-20	1	0.402	1.07778
9.493	-19	1	0.335	1.05462
9.653	-18	1	0.268	1.03529
9.813	-17	1	0.201	1.02
10.008	-16	1	0.134	1.00894
10.218	-15	1	0.067	1.00224
10.363	-14	0	0	0
10.693	-13	1	0.067	1.00224
10.888	-12	1	0.134	1.00894
11.063	-11	1	0.201	1.02
11.213	-10	1	0.268	1.03529
11.513	-9	1	0.335	1.05462
11.713	-8	1	0.402	1.07778
11.868	-7	1	0.469	1.10452
12.098	-6	1	0.536	1.13459
12.301	-5	1	0.603	1.16774
12.513	-4	1	0.67	1.2037
12.728	-3	1	0.737	1.24224
12.888	-2	1	0.804	1.28313
13.068	-1	1	0.871	1.32614
13.183	0	1	0.938	1.37107
13.393	1	1	1.005	1.41775
13.593	2	1	1.072	1.46601
13.808	3	1	1.139	1.51569
14.018	4	1	1.206	1.56666
14.198	5	1	1.273	1.6188
14.368	6	1	1.34	1.672
14.514	7	1	1.407	1.72617
14.668	8	1	1.474	1.7812
14.859	9	1	1.541	1.83703
15.019	10	1	1.608	1.89358
15.224	11	1	1.675	1.9508
15.409	12	1	1.742	2.00862
15.57	13	1	1.809	2.067
15.7	14	1	1.876	2.12588
15.845	15	1	1.943	2.18523
16	16	1	2.01	2.24502
16.1	17	1	2.077	2.3052
16.365	18	1	2.144	2.36574
16.526	19	1	2.211	2.42663
16.633	20	1	2.278	2.48783
16.756	21	1	2.345	2.54932
16.921	22	1	2.412	2.61108
17.046	23	1	2.479	2.6731
17.176	24	1	2.546	2.73535
17.332	25	1	2.613	2.79782
17.572	26	1	2.68	2.86049
17.692	27	1	2.68	2.86049
17.897	28	1	2.613	2.79782
18.038	29	1	2.546	2.73535
18.148	30	1	2.479	2.6731
18.288	31	1	2.412	2.61108
18.438	32	1	2.345	2.54932
18.578	33	1	2.278	2.48783
18.759	34	1	2.211	2.42663
18.869	35	1	2.144	2.36574
18.98	36	1	2.077	2.3052
19.074	37	1	2.01	2.24502
19.214	38	1	1.943	2.18523
19.375	39	1	1.876	2.12588
19.49	40	1	1.809	2.067
19.64	41	1	1.742	2.00862
19.754	42	1	1.675	1.9508
19.875	43	1	1.608	1.89358
20.005	44	1	1.541	1.83703
20.166	45	1	1.474	1.7812
20.296	46	1	1.407	1.72617
20.436	47	1	1.34	1.672
20.606	48	1	1.273	1.6188
20.691	49	1	1.206	1.56666
20.891	50	1	1.139	1.51569
21.092	51	1	1.072	1.46601
21.312	52	1	1.005	1.41775
21.442	53	1	0.938	1.37107
21.582	54	1	0.871	1.32614
21.757	55	1	0.804	1.28313
21.892	56	1	0.737	1.24224
22.002	57	1	0.67	1.2037
22.127	58	1	0.603	1.16774
22.348	59	1	0.536	1.13459
22.543	60	1	0.469	1.10452
22.683	61	1	0.402	1.07778
22.843	62	1	0.335	1.05462
22.948	63	1	0.268	1.03529
23.088	64	1	0.201	1.02
23.173	65	1	0.134	1.00894
23.363	66	0	0.067	0.067
23.558	67	1	0	1
23.763	68	1	0.067	1.00224
23.923	69	1	0.134	1.00894
24.074	70	1	0.201	1.02
24.199	71	1	0.268	1.03529
24.364	72	1	0.335	1.05462
24.46	73	1	0.402	1.07778
24.61	74	1	0.469	1.10452
24.731	75	1	0.536	1.13459
24.876	76	1	0.603	1.16774
25.148	77	1	0.67	1.2037
25.259	78	1	0.737	1.24224
25.374	79	1	0.804	1.28313
25.574	80	1	0.871	1.32614
25.761	81	1	0.938	1.37107
25.906	82	1	1.005	1.41775
26.051	83	1	1.072	1.46601
26.172	84	1	1.139	1.51569
26.278	85	1	1.206	1.56666
26.449	86	1	1.273	1.6188
26.665	87	1	1.34	1.672
26.866	88	1	1.407	1.72617
26.997	89	1	1.474	1.7812
27.122	90	1	1.541	1.83703
27.228	91	1	1.608	1.89358
27.364	92	1	1.675	1.9508
27.55	93	1	1.742	2.00862
27.806	94	1	1.809	2.067
27.997	95	1	1.876	2.12588
28.163	96	1	1.943	2.18523
28.314	97	1	2.01	2.24502
28.459	98	1	2.077	2.3052
28.564	99	1	2.144	2.36574
28.785	100	1	2.211	2.42663
28.92	101	1	2.278	2.48783
29.056	102	1	2.211	2.42663
29.211	103	1	2.144	2.36574
29.327	104	1	2.077	2.3052
29.477	105	1	2.01	2.24502
29.598	106	1	1.943	2.18523
29.843	107	1	1.876	2.12588
29.948	108	1	1.809	2.067
30.053	109	1	1.742	2.00862
30.208	110	1	1.675	1.9508
30.303	111	1	1.608	1.89358
30.403	112	1	1.541	1.83703
30.538	113	1	1.474	1.7812
30.658	114	1	1.407	1.72617
30.762	115	1	1.34	1.672
30.872	116	1	1.273	1.6188
30.978	117	1	1.206	1.56666
31.098	118	1	1.139	1.51569
31.203	119	1	1.072	1.46601
31.402	120	1	1.005	1.41775
31.496	121	1	0.938	1.37107
31.601	122	1	0.871	1.32614
31.701	123	1	0.804	1.28313
31.815	124	1	0.737	1.24224
31.96	125	1	0.67	1.2037
32.074	126	1	0.603	1.16774
32.204	127	1	0.536	1.13459
32.313	128	1	0.469	1.10452
32.423	129	1	0.402	1.07778
32.518	130	1	0.335	1.05462
32.658	131	1	0.268	1.03529
32.753	132	1	0.201	1.02
32.863	133	1	0.134	1.00894
32.963	134	0	0.067	0.067
33.113	135	1	0	1
33.228	136	1	0.067	1.00224
33.351	137	1	0.134	1.00894
33.427	138	1	0.201	1.02
33.636	139	1	0.134	1.00894
33.763	140	1	0.067	1.00224
33.937	141	1	0	1
34.029	142	1	0.067	1.00224
34.184	143	1	0.134	1.00894
34.279	144	1	0.201	1.02
34.419	145	1	0.268	1.03529
34.543	146	1	0.335	1.05462
34.728	147	1	0.402	1.07778
34.858	148	1	0.469	1.10452
34.988	149	1	0.536	1.13459
35.098	150	1	0.603	1.16774
35.217	151	1	0.67	1.2037
35.313	152	1	0.737	1.24224
35.403	153	1	0.804	1.28313
35.463	154	1	0.871	1.32614
35.613	155	1	0.938	1.37107
35.752	156	1	1.005	1.41775
35.957	157	1	1.072	1.46601
36.052	158	1	1.139	1.51569
36.133	159	1	1.206	1.56666
36.268	160	1	1.273	1.6188
36.431	161	1	1.34	1.672
36.527	162	1	1.407	1.72617
36.646	163	1	1.474	1.7812
36.772	164	1	1.541	1.83703
36.911	165	1	1.608	1.89358
37.091	166	1	1.675	1.9508
37.292	167	1	1.742	2.00862
37.495	168	1	1.809	2.067
37.779	169	1	1.876	2.12588
37.889	170	1	1.943	2.18523
38.013	171	1	2.01	2.24502
38.118	172	1	2.077	2.3052
38.242	173	1	2.144	2.36574
38.332	174	1	2.211	2.42663
38.438	175	1	2.278	2.48783
38.618	176	1	2.345	2.54932
38.733	177	1	2.412	2.61108
38.931	178	1	2.479	2.6731
39.051	179	1	2.546	2.73535
39.191	180	1	2.613	2.79782
39.326	181	1	2.68	2.86049
39.42	182	1	2.747	2.92336
39.565	183	1	2.814	2.9864
39.72	184	1	2.881	3.04962
39.824	185	1	2.948	3.11299
39.893	186	1	3.015	3.17651
40.043	187	1	3.082	3.24017
40.108	188	1	3.149	3.30397
40.293	189	1	3.216	3.36789
40.412	190	1	3.283	3.43192
40.507	191	1	3.35	3.49607
40.642	192	1	3.417	3.56032
40.751	193	1	3.484	3.62467
40.901	194	1	3.551	3.68912
41.026	195	1	3.618	3.75365
41.151	196	1	3.685	3.81828
41.275	197	1	3.752	3.88298
41.395	198	1	3.819	3.94775
41.48	199	1	3.819	3.94775
41.594	200	1	3.752	3.88298
41.709	201	1	3.685	3.81828
41.874	202	1	3.618	3.75365
41.959	203	1	3.551	3.68912
42.103	204	1	3.484	3.62467
42.218	205	1	3.417	3.56032
42.287	206	1	3.35	3.49607
42.412	207	1	3.283	3.43192
42.496	208	1	3.216	3.36789
42.591	209	1	3.149	3.30397
42.786	210	1	3.082	3.24017
42.89	211	1	3.015	3.17651
43.01	212	1	2.948	3.11299
43.065	213	1	2.881	3.04962
43.194	214	1	2.814	2.9864
43.314	215	1	2.747	2.92336
43.394	216	1	2.68	2.86049
43.459	217	1	2.613	2.79782
43.554	218	1	2.546	2.73535
43.699	219	1	2.479	2.6731
43.804	220	1	2.412	2.61108
43.908	221	1	2.345	2.54932
44.023	222	1	2.278	2.48783
44.153	223	1	2.211	2.42663
44.292	224	1	2.144	2.36574
44.407	225	1	2.077	2.3052
44.497	226	1	2.01	2.24502
44.567	227	1	1.943	2.18523
44.701	228	1	1.876	2.12588
44.801	229	1	1.809	2.067
44.886	230	1	1.742	2.00862
44.991	231	1	1.675	1.9508
45.141	232	1	1.608	1.89358
45.266	233	1	1.541	1.83703
45.396	234	1	1.474	1.7812
45.536	235	1	1.407	1.72617
45.636	236	1	1.34	1.672
45.78	237	1	1.273	1.6188
45.92	238	1	1.206	1.56666
46.009	239	1	1.139	1.51569
46.149	240	1	1.072	1.46601
46.269	241	1	1.005	1.41775
46.354	242	1	0.938	1.37107
46.474	243	1	0.871	1.32614
46.614	244	1	0.804	1.28313
46.769	245	1	0.737	1.24224
46.849	246	1	0.67	1.2037
46.969	247	1	0.603	1.16774
47.094	248	1	0.536	1.13459
47.209	249	1	0.469	1.10452
47.349	250	1	0.402	1.07778
47.439	251	1	0.335	1.05462
47.554	252	1	0.268	1.03529
47.689	253	1	0.201	1.02
47.804	254	1	0.134	1.00894
47.904	255	1	0.067	1.00224
48.039	256	1	0	1
48.169	257	1	0.067	1.00224
48.244	258	1	0.134	1.00894
48.37	259	1	0.201	1.02
48.465	260	1	0.268	1.03529
48.661	261	1	0.335	1.05462
48.731	262	1	0.402	1.07778
48.847	263	1	0.469	1.10452
48.953	264	1	0.536	1.13459
49.028	265	1	0.603	1.16774
49.104	266	1	0.67	1.2037
49.184	267	1	0.737	1.24224
49.28	268	1	0.804	1.28313
49.401	269	1	0.871	1.32614
49.476	270	1	0.938	1.37107
49.552	271	1	1.005	1.41775
49.668	272	1	1.072	1.46601
49.804	273	1	1.139	1.51569
49.94	274	1	1.206	1.56666
50.076	275	1	1.273	1.6188
50.126	276	1	1.34	1.672
50.222	277	1	1.407	1.72617
50.353	278	1	1.474	1.7812
50.474	279	1	1.541	1.83703
50.56	280	1	1.608	1.89358
50.645	281	1	1.675	1.9508
50.736	282	1	1.742	2.00862
50.898	283	1	1.809	2.067
50.983	284	1	1.876	2.12588
51.074	285	1	1.943	2.18523
51.176	286	1	2.01	2.24502
51.261	287	1	2.077	2.3052
51.402	288	1	2.144	2.36574
51.513	289	1	2.211	2.42663
51.67	290	1	2.278	2.48783
51.74	291	1	2.345	2.54932
51.851	292	1	2.412	2.61108
52.037	293	1	2.479	2.6731
52.143	294	1	2.546	2.73535
52.249	295	1	2.613	2.79782
52.415	296	1	2.68	2.86049
52.525	297	1	2.747	2.92336
52.651	298	1	2.814	2.9864
52.761	299	1	2.881	3.04962
52.832	300	1	2.948	3.11299
52.927	301	1	3.015	3.17651
53.057	302	1	3.082	3.24017
53.187	303	1	3.149	3.30397
53.303	304	1	3.216	3.36789
53.443	305	1	3.283	3.43192
53.518	306	1	3.283	3.43192
53.604	307	1	3.216	3.36789
53.692	308	1	3.149	3.30397
53.789	309	1	3.082	3.24017
53.925	310	1	3.015	3.17651
54.005	311	1	2.948	3.11299
54.221	312	1	2.881	3.04962
54.281	313	1	2.814	2.9864
54.361	314	1	2.747	2.92336
54.511	315	1	2.68	2.86049
54.626	316	1	2.613	2.79782
54.766	317	1	2.546	2.73535
54.911	318	1	2.479	2.6731
55.036	319	1	2.412	2.61108
55.177	320	1	2.345	2.54932
55.267	321	1	2.278	2.48783
55.377	322	1	2.211	2.42663
55.477	323	1	2.144	2.36574
55.632	324	1	2.077	2.3052
55.718	325	1	2.01	2.24502
55.813	326	1	1.943	2.18523
55.882	327	1	1.876	2.12588
55.992	328	1	1.809	2.067
56.077	329	1	1.742	2.00862
56.137	330	1	1.675	1.9508
56.257	331	1	1.608	1.89358
56.383	332	1	1.541	1.83703
56.488	333	1	1.474	1.7812
56.548	334	1	1.407	1.72617
56.663	335	1	1.34	1.672
56.728	336	1	1.273	1.6188
56.818	337	1	1.206	1.56666
56.888	338	1	1.139	1.51569
57.028	339	1	1.072	1.46601
57.108	340	1	1.005	1.41775
57.228	341	1	0.938	1.37107
57.378	342	1	0.871	1.32614
57.443	343	1	0.804	1.28313
57.513	344	1	0.737	1.24224
57.608	345	1	0.67	1.2037
57.722	346	1	0.603	1.16774
57.798	347	1	0.536	1.13459
57.89	348	1	0.469	1.10452
57.993	349	1	0.402	1.07778
58.118	350	1	0.335	1.05462
58.184	351	1	0.268	1.03529
58.254	352	1	0.201	1.02
58.354	353	1	0.134	1.00894
58.473	354	1	0.067	1.00224
58.638	355	1	0	1
58.773	356	1	0.067	1.00224
58.879	357	1	0.134	1.00894
58.994	358	1	0.201	1.02
59.069	359	1	0.268	1.03529
59.174	360	1	0.335	1.05462
59.298	361	1	0.402	1.07778
59.388	362	1	0.469	1.10452
59.474	363	1	0.536	1.13459
59.583	364	1	0.603	1.16774
59.659	365	1	0.67	1.2037
59.784	366	1	0.737	1.24224
59.899	367	1	0.804	1.28313
59.979	368	1	0.871	1.32614
60.059	369	1	0.938	1.37107
60.129	370	1	1.005	1.41775
60.244	371	1	1.072	1.46601
60.329	372	1	1.139	1.51569
60.449	373	1	1.206	1.56666
60.574	374	1	1.273	1.6188
60.689	375	1	1.34	1.672
60.813	376	1	1.407	1.72617
60.908	377	1	1.474	1.7812
60.978	378	1	1.541	1.83703
61.068	379	1	1.608	1.89358
61.188	380	1	1.675	1.9508
61.283	381	1	1.742	2.00862
61.358	382	1	1.809	2.067
61.438	383	1	1.876	2.12588
61.573	384	1	1.943	2.18523
61.703	385	1	2.01	2.24502
61.828	386	1	2.077	2.3052
61.903	387	1	2.144	2.36574
61.998	388	1	2.211	2.42663
62.107	389	1	2.278	2.48783
62.197	390	1	2.345	2.54932
62.297	391	1	2.412	2.61108
62.427	392	1	2.479	2.6731
62.522	393	1	2.546	2.73535
62.622	394	1	2.613	2.79782
62.742	395	1	2.68	2.86049
62.857	396	1	2.747	2.92336
63.012	397	1	2.814	2.9864
63.097	398	1	2.881	3.04962
63.162	399	1	2.948	3.11299
63.312	400	1	3.015	3.17651
63.422	401	2	3.082	3.67406
63.487	402	2	3.149	3.73044
63.571	403	2	3.216	3.78717
63.661	404	2	3.283	3.84423
63.756	405	2	3.35	3.9016
63.896	406	2	3.417	3.95928
63.986	407	2	3.484	4.01724
64.105	408	2	3.551	4.07549
64.225	409	2	3.618	4.134
64.335	410	2	3.685	4.19276
64.445	411	2	3.752	4.25176
64.54	412	2	3.819	4.311
64.65	413	2	3.886	4.37047
64.78	414	2	3.953	4.43015
64.89	415	2	4.02	4.49003
64.985	416	2	4.087	4.55012
65.095	417	2	4.154	4.61039
65.17	418	2	4.221	4.67085
65.229	419	2	4.288	4.73148
65.344	420	2	4.355	4.79229
65.474	421	2	4.422	4.85325
65.584	422	2	4.489	4.91438
65.659	423	2	4.556	4.97565
65.749	424	2	4.489	4.91438
65.834	425	2	4.422	4.85325
65.949	426	2	4.355	4.79229
66.043	427	2	4.288	4.73148
66.133	428	2	4.221	4.67085
66.228	429	2	4.154	4.61039
66.363	430	2	4.087	4.55012
66.468	431	2	4.02	4.49003
66.528	432	2	3.953	4.43015
66.603	433	2	3.886	4.37047
66.708	434	2	3.819	4.311
66.802	435	2	3.752	4.25176
66.897	436	2	3.685	4.19276
67.012	437	2	3.618	4.134
67.102	438	2	3.551	4.07549
67.197	439	2	3.484	4.01724
67.292	440	2	3.417	3.95928
67.452	441	2	3.35	3.9016
67.542	442	2	3.283	3.84423
67.697	443	2	3.216	3.78717
67.782	444	2	3.149	3.73044
67.876	445	2	3.082	3.67406
67.975	446	2	3.015	3.61804
68.05	447	2	2.948	3.5624
68.161	448	2	2.881	3.50716
68.251	449	2	2.814	3.45233
68.316	450	2	2.747	3.39794
68.391	451	2	2.68	3.34401
68.501	452	2	2.613	3.29056
68.601	453	2	2.546	3.23761
68.661	454	2	2.479	3.18519
68.766	455	2	2.412	3.13333
68.895	456	2	2.345	3.08205
68.996	457	2	2.278	3.03138
69.111	458	2	2.211	2.98136
69.216	459	2	2.144	2.93202
69.295	460	2	2.077	2.88339
69.37	461	2	2.01	2.83551
69.47	462	2	1.943	2.78841
69.56	463	2	1.876	2.74215
69.685	464	2	1.809	2.69675
69.805	465	2	1.742	2.65228
69.885	466	2	1.675	2.60876
70	467	2	1.608	2.56625
70.095	468	2	1.541	2.52481
70.22	469	2	1.474	2.48449
70.335	470	2	1.407	2.44533
70.41	471	2	1.34	2.40741
70.505	472	2	1.273	2.37077
70.62	473	2	1.206	2.33547
70.706	474	2	1.139	2.30159
70.862	475	2	1.072	2.26918
70.948	476	2	1.005	2.23831
71.099	477	2	0.938	2.20904
71.185	478	2	0.871	2.18143
71.324	479	2	0.804	2.15555
71.463	480	2	0.737	2.13147
71.584	481	2	0.67	2.10924
71.664	482	2	0.603	2.08893
71.735	483	2	0.536	2.07058
71.863	484	2	0.469	2.05425
71.942	485	2	0.402	2.04
72.015	486	2	0.335	2.02786
72.093	487	2	0.268	2.01788
72.145	488	2	0.201	2.01007
72.26	489	2	0.134	2.00448
72.35	490	2	0.067	2.00112
72.48	491	2	0	2
72.575	492	2	0.067	2.00112
72.705	493	2	0.134	2.00448
72.775	494	2	0.201	2.01007
72.889	495	2	0.268	2.01788
72.979	496	2	0.335	2.02786
73.049	497	2	0.402	2.04
73.114	498	2	0.469	2.05425
73.199	499	2	0.536	2.07058
73.25	500	2	0.603	2.08893
73.33	501	2	0.67	2.10924
73.39	502	2	0.737	2.13147
73.44	503	2	0.804	2.15555
73.54	504	2	0.871	2.18143
73.639	505	2	0.938	2.20904
73.749	506	2	1.005	2.23831
73.799	507	2	1.072	2.26918
73.899	508	2	1.139	2.30159
74.075	509	2	1.206	2.33547
74.185	510	2	1.273	2.37077
74.255	511	2	1.34	2.40741
74.39	512	2	1.407	2.44533
74.515	513	2	1.474	2.48449
74.645	514	2	1.541	2.52481
74.78	515	2	1.608	2.56625
74.86	516	2	1.675	2.60876
74.955	517	2	1.742	2.65228
75.055	518	2	1.809	2.69675
75.185	519	2	1.876	2.74215
75.246	520	2	1.943	2.78841
75.361	521	2	2.01	2.83551
75.491	522	2	2.077	2.88339
75.561	523	2	2.144	2.93202
75.656	524	2	2.211	2.98136
75.746	525	2	2.278	3.03138
75.816	526	2	2.345	3.08205
75.961	527	2	2.412	3.13333
76.111	528	2	2.479	3.18519
76.211	529	2	2.546	3.23761
76.281	530	2	2.613	3.29056
76.411	531	2	2.68	3.34401
76.586	532	2	2.747	3.39794
76.661	533	2	2.814	3.45233
76.775	534	2	2.881	3.50716
76.88	535	2	2.948	3.5624
76.981	536	2	3.015	3.61804
77.062	537	2	3.082	3.67406
77.112	538	2	3.149	3.73044
77.271	539	2	3.216	3.78717
77.331	540	2	3.283	3.84423
77.446	541	2	3.35	3.9016
77.587	542	2	3.417	3.95928
77.687	543	2	3.484	4.01724
77.762	544	2	3.551	4.07549
77.852	545	2	3.618	4.134
77.992	546	2	3.685	4.19276
78.062	547	2	3.752	4.25176
78.118	548	2	3.819	4.311
78.203	549	2	3.819	4.311
78.263	550	2	3.752	4.25176
78.327	551	2	3.685	4.19276
78.392	552	2	3.618	4.134
78.432	553	2	3.551	4.07549
78.497	554	2	3.484	4.01724
78.587	555	2	3.417	3.95928
78.628	556	2	3.35	3.9016
78.683	557	2	3.283	3.84423
78.758	558	2	3.216	3.78717
78.833	559	2	3.149	3.73044
78.913	560	2	3.082	3.67406
78.983	561	2	3.015	3.61804
79.058	562	2	2.948	3.5624
79.218	563	2	2.881	3.50716
79.318	564	2	2.814	3.45233
79.393	565	2	2.747	3.39794
79.498	566	2	2.68	3.34401
79.653	567	2	2.613	3.29056
79.778	568	2	2.546	3.23761
79.883	569	2	2.479	3.18519
79.993	570	2	2.412	3.13333
80.113	571	2	2.345	3.08205
80.183	572	2	2.278	3.03138
80.253	573	2	2.211	2.98136
80.343	574	2	2.144	2.93202
80.458	575	2	2.077	2.88339
80.583	576	2	2.01	2.83551
80.663	577	2	1.943	2.78841
80.748	578	2	1.876	2.74215
80.833	579	2	1.809	2.69675
80.923	580	2	1.742	2.65228
81.028	581	2	1.675	2.60876
81.123	582	2	1.608	2.56625
81.244	583	2	1.541	2.52481
81.359	584	2	1.474	2.48449
81.479	585	2	1.407	2.44533
81.584	586	2	1.34	2.40741
81.694	587	2	1.273	2.37077
81.819	588	2	1.206	2.33547
81.939	589	2	1.139	2.30159
82.04	590	2	1.072	2.26918
82.115	591	2	1.005	2.23831
82.23	592	2	0.938	2.20904
82.335	593	2	0.871	2.18143
82.43	594	2	0.804	2.15555
82.51	595	2	0.737	2.13147
82.615	596	2	0.67	2.10924
82.724	597	2	0.603	2.08893
82.814	598	2	0.536	2.07058
82.915	599	2	0.469	2.05425
83	600	2	0.402	2.04
83.09	601	2	0.335	2.02786
83.225	602	2	0.268	2.01788
83.376	603	2	0.201	2.01007
83.485	604	2	0.134	2.00448
83.565	605	2	0.067	2.00112
83.649	606	2	0	2
83.729	607	2	0.067	2.00112
83.824	608	2	0.134	2.00448
83.908	609	2	0.201	2.01007
83.993	610	2	0.268	2.01788
84.11	611	2	0.335	2.02786
84.225	612	2	0.402	2.04
84.35	613	2	0.469	2.05425
84.45	614	2	0.536	2.07058
84.554	615	2	0.603	2.08893
84.703	616	2	0.67	2.10924
84.772	617	2	0.737	2.13147
84.877	618	2	0.804	2.15555
84.966	619	2	0.871	2.18143
85.081	620	2	0.938	2.20904
85.161	621	2	1.005	2.23831
85.276	622	2	1.072	2.26918
85.38	623	2	1.139	2.30159
85.519	624	2	1.206	2.33547
85.594	625	2	1.273	2.37077
85.678	626	2	1.34	2.40741
85.797	627	2	1.407	2.44533
85.847	628	2	1.474	2.48449
85.981	629	2	1.541	2.52481
86.149	630	2	1.608	2.56625
86.278	631	2	1.675	2.60876
86.367	632	2	1.742	2.65228
86.437	633	2	1.809	2.69675
86.511	634	2	1.876	2.74215
86.611	635	2	1.943	2.78841
86.685	636	2	1.876	2.74215
86.77	637	2	1.809	2.69675
86.874	638	2	1.742	2.65228
86.934	639	2	1.675	2.60876
86.993	640	2	1.608	2.56625
87.068	641	2	1.541	2.52481
87.167	642	2	1.474	2.48449
87.237	643	2	1.407	2.44533
87.322	644	2	1.34	2.40741
87.386	645	2	1.273	2.37077
87.461	646	2	1.206	2.33547
87.565	647	2	1.139	2.30159
87.759	648	2	1.072	2.26918
87.893	649	2	1.005	2.23831
88.023	650	2	0.938	2.20904
88.083	651	2	0.871	2.18143
88.168	652	2	0.804	2.15555
88.297	653	2	0.737	2.13147
88.382	654	2	0.67	2.10924
88.467	655	2	0.603	2.08893
88.561	656	2	0.536	2.07058
88.631	657	2	0.469	2.05425
88.696	658	2	0.402	2.04
88.746	659	2	0.335	2.02786
88.825	660	2	0.268	2.01788
88.925	661	2	0.201	2.01007
89.055	662	2	0.134	2.00448
89.16	663	2	0.067	2.00112
89.265	664	2	0	2
89.35	665	2	0.067	2.00112
89.45	666	2	0.134	2.00448
89.544	667	2	0.201	2.01007
89.617	668	2	0.268	2.01788
89.687	669	2	0.335	2.02786
89.731	670	2	0.268	2.01788
89.844	671	2	0.201	2.01007
89.939	672	2	0.134	2.00448
90.06	673	2	0.067	2.00112
90.185	674	2	0	2
90.275	675	2	0.067	2.00112
90.379	676	2	0.134	2.00448
90.462	677	2	0.201	2.01007
90.545	678	2	0.201	2.01007
90.625	679	2	0.134	2.00448
90.705	680	2	0.067	2.00112
90.779	681	2	0	2
90.873	682	2	0.067	2.00112
90.939	683	2	0.134	2.00448
91.049	684	2	0.201	2.01007
91.142	685	2	0.268	2.01788
91.241	686	2	0.335	2.02786
91.312	687	2	0.335	2.02786
91.385	688	2	0.268	2.01788
91.5	689	2	0.201	2.01007
91.562	690	2	0.134	2.00448
91.755	691	1	0.067	1.00224
91.838	692	1	0	1
91.965	693	1	0.067	1.00224
92.125	694	2	0.134	2.00448
92.225	695	2	0.201	2.01007
92.37	696	2	0.268	2.01788
92.435	697	2	0.335	2.02786
92.525	698	2	0.402	2.04
92.625	699	2	0.469	2.05425
92.67	700	2	0.536	2.07058
92.765	701	2	0.603	2.08893
92.895	702	2	0.67	2.10924
93.011	703	2	0.737	2.13147
93.106	704	2	0.804	2.15555
93.166	705	2	0.871	2.18143
93.216	706	2	0.938	2.20904
93.305	707	2	0.871	2.18143
93.415	708	2	0.804	2.15555
93.546	709	2	0.737	2.13147
93.646	710	2	0.67	2.10924
93.781	711	2	0.603	2.08893
93.951	712	2	0.536	2.07058
94.021	713	2	0.469	2.05425
94.081	714	2	0.402	2.04
94.161	715	2	0.335	2.02786
94.201	716	2	0.268	2.01788
94.287	717	2	0.201	2.01007
94.362	718	2	0.134	2.00448
94.442	719	2	0.067	2.00112
94.566	720	2	0	2
94.658	721	2	0.067	2.00112
94.716	722	2	0.134	2.00448
94.816	723	2	0.201	2.01007
94.881	724	2	0.268	2.01788
95.004	725	2	0.335	2.02786
95.073	726	2	0.402	2.04
95.158	727	2	0.469	2.05425
95.268	728	2	0.536	2.07058
95.387	729	2	0.603	2.08893
95.491	730	2	0.67	2.10924
95.561	731	2	0.737	2.13147
95.635	732	2	0.804	2.15555
95.723	733	2	0.871	2.18143
95.821	734	2	0.938	2.20904
95.89	735	2	1.005	2.23831
95.989	736	2	1.072	2.26918
96.063	737	2	1.139	2.30159
96.138	738	2	1.206	2.33547
96.256	739	2	1.273	2.37077
96.335	740	2	1.34	2.40741
96.424	741	2	1.407	2.44533
96.488	742	2	1.474	2.48449
96.602	743	2	1.541	2.52481
96.7	744	2	1.608	2.56625
96.774	745	2	1.675	2.60876
96.888	746	2	1.742	2.65228
96.982	747	2	1.809	2.69675
97.11	748	2	1.876	2.74215
97.18	749	2	1.943	2.78841
97.234	750	2	1.943	2.78841
97.318	751	2	1.876	2.74215
97.378	752	2	1.809	2.69675
97.432	753	2	1.742	2.65228
97.502	754	2	1.675	2.60876
97.601	755	2	1.608	2.56625
97.76	756	2	1.541	2.52481
97.864	757	2	1.474	2.48449
97.939	758	2	1.407	2.44533
97.994	759	2	1.34	2.40741
98.089	760	2	1.273	2.37077
98.184	761	2	1.206	2.33547
98.276	762	2	1.139	2.30159
98.333	763	2	1.072	2.26918
98.455	764	2	1.005	2.23831
98.535	765	2	0.938	2.20904
98.6	766	2	0.871	2.18143
98.698	767	2	0.804	2.15555
98.807	768	2	0.737	2.13147
98.882	769	2	0.67	2.10924
98.981	770	2	0.603	2.08893
99.123	771	2	0.536	2.07058
99.171	772	2	0.469	2.05425
99.228	773	2	0.402	2.04
99.301	774	2	0.335	2.02786
99.42	775	2	0.268	2.01788
99.467	776	2	0.201	2.01007
99.512	777	2	0.134	2.00448
99.582	778	2	0.067	2.00112
99.662	779	2	0	2
99.766	780	2	0.067	2.00112
99.87	781	2	0.134	2.00448
99.97	782	2	0.201	2.01007
100.075	783	2	0.268	2.01788
100.164	784	2	0.335	2.02786
100.259	785	2	0.402	2.04
100.328	786	2	0.469	2.05425
100.433	787	2	0.536	2.07058
100.502	788	2	0.603	2.08893
100.557	789	2	0.67	2.10924
100.675	790	2	0.737	2.13147
100.774	791	2	0.804	2.15555
100.887	792	2	0.871	2.18143
100.99	793	2	0.938	2.20904
101.045	794	2	1.005	2.23831
101.114	795	2	1.072	2.26918
101.242	796	2	1.139	2.30159
101.301	797	2	1.206	2.33547
101.419	798	2	1.273	2.37077
101.517	799	2	1.34	2.40741
101.67	800	2	1.407	2.44533
101.743	801	2	1.474	2.48449
101.832	802	2	1.541	2.52481
101.945	803	2	1.608	2.56625
102.05	804	2	1.675	2.60876
102.179	805	2	1.742	2.65228
102.248	806	2	1.809	2.69675
102.371	807	2	1.876	2.74215
102.44	808	2	1.943	2.78841
102.509	809	2	2.01	2.83551
102.578	810	2	2.077	2.88339
102.656	811	2	2.01	2.83551
102.715	812	2	1.943	2.78841
102.77	813	2	1.876	2.74215
102.883	814	2	1.809	2.69675
102.971	815	2	1.742	2.65228
103.055	816	2	1.675	2.60876
103.164	817	2	1.608	2.56625
103.223	818	2	1.541	2.52481
103.306	819	2	1.474	2.48449
103.365	820	2	1.407	2.44533
103.458	821	2	1.34	2.40741
103.542	822	2	1.273	2.37077
103.646	823	2	1.206	2.33547
103.73	824	2	1.139	2.30159
103.789	825	2	1.072	2.26918
103.863	826	2	1.005	2.23831
103.968	827	2	0.938	2.20904
104.053	828	2	0.871	2.18143
104.113	829	2	0.804	2.15555
104.177	830	2	0.737	2.13147
104.272	831	2	0.67	2.10924
104.331	832	2	0.603	2.08893
104.426	833	2	0.536	2.07058
104.516	834	2	0.469	2.05425
104.611	835	2	0.402	2.04
104.681	836	2	0.335	2.02786
104.761	837	2	0.268	2.01788
104.941	838	2	0.201	2.01007
105.015	839	2	0.134	2.00448
105.087	840	2	0.067	2.00112
105.176	841	2	0	2
105.261	842	2	0.067	2.00112
105.331	843	2	0.134	2.00448
105.401	844	2	0.201	2.01007
105.487	845	2	0.268	2.01788
105.592	846	2	0.335	2.02786
105.692	847	2	0.402	2.04
105.777	848	2	0.469	2.05425
105.872	849	2	0.536	2.07058
105.927	850	2	0.603	2.08893
106.052	851	2	0.67	2.10924
106.143	852	2	0.737	2.13147
106.238	853	2	0.804	2.15555
106.389	854	2	0.871	2.18143
106.48	855	2	0.938	2.20904
106.545	856	2	1.005	2.23831
106.616	857	2	1.072	2.26918
106.701	858	2	1.139	2.30159
106.812	859	2	1.206	2.33547
106.902	860	2	1.273	2.37077
106.983	861	2	1.34	2.40741
107.033	862	2	1.407	2.44533
107.114	863	2	1.474	2.48449
107.2	864	2	1.541	2.52481
107.296	865	2	1.608	2.56625
107.351	866	2	1.675	2.60876
107.492	867	2	1.742	2.65228
107.593	868	2	1.809	2.69675
107.659	869	2	1.876	2.74215
107.744	870	2	1.943	2.78841
107.881	871	2	2.01	2.83551
107.931	872	2	2.077	2.88339
107.987	873	2	2.144	2.93202
108.068	874	2	2.211	2.98136
108.154	875	2	2.278	3.03138
108.23	876	2	2.345	3.08205
108.321	877	2	2.412	3.13333
108.442	878	2	2.479	3.18519
108.563	879	2	2.546	3.23761
108.679	880	2	2.613	3.29056
108.739	881	2	2.68	3.34401
108.83	882	2	2.747	3.39794
108.895	883	2	2.814	3.45233
108.955	884	2	2.881	3.50716
109.001	885	2	2.948	3.5624
109.071	886	2	3.015	3.61804
109.172	887	2	3.082	3.67406
109.267	888	2	3.149	3.73044
109.353	889	2	3.216	3.78717
109.424	890	2	3.283	3.84423
109.504	891	2	3.35	3.9016
109.61	892	2	3.417	3.95928
109.726	893	2	3.484	4.01724
109.816	894	2	3.551	4.07549
109.887	895	2	3.618	4.134
109.972	896	2	3.685	4.19276
110.057	897	2	3.752	4.25176
110.168	898	2	3.819	4.311
110.309	899	2	3.886	4.37047
110.404	900	2	3.953	4.43015
110.485	901	2	4.02	4.49003
110.59	902	2	4.087	4.55012
110.675	903	2	4.154	4.61039
110.81	904	2	4.221	4.67085
110.91	905	2	4.288	4.73148
110.98	906	2	4.355	4.79229
111.098	907	2	4.422	4.85325
111.254	908	2	4.489	4.91438
111.334	909	2	4.556	4.97565
111.4	910	2	4.623	5.03708
111.465	911	2	4.69	5.09864
111.555	912	2	4.757	5.16033
111.607	913	2	4.824	5.22216
111.701	914	2	4.891	5.28412
111.791	915	2	4.958	5.34619
111.886	916	2	5.025	5.40838
111.965	917	2	5.092	5.47069
112.025	918	2	5.159	5.53311
112.15	919	2	5.226	5.59563
112.225	920	2	5.293	5.65825
112.275	921	2	5.36	5.72098
112.405	922	2	5.427	5.7838
112.49	923	2	5.494	5.84671
112.54	924	2	5.561	5.90971
112.65	925	2	5.628	5.9728
112.795	926	2	5.695	6.03598
112.865	927	2	5.762	6.09923
112.944	928	2	5.829	6.16257
112.994	929	2	5.896	6.22598
113.059	930	2	5.963	6.28946
113.099	931	2	6.03	6.35302
113.174	932	2	6.097	6.41665
113.238	933	2	6.164	6.48035
113.268	934	2	6.231	6.54411
113.402	935	2	6.298	6.60793
113.537	936	2	6.365	6.67182
113.622	937	2	6.432	6.73577
113.737	938	2	6.499	6.79978
113.812	939	2	6.566	6.86384
113.877	940	2	6.633	6.92796
113.987	941	2	6.7	6.99214
114.087	942	2	6.767	7.05637
114.147	943	2	6.834	7.12064
114.197	944	2	6.901	7.18497
114.287	945	2	6.968	7.24935
114.406	946	2	7.035	7.31377
114.471	947	2	7.102	7.37824
114.57	948	2	7.169	7.44275
114.62	949	2	7.236	7.50731
114.665	950	2	7.303	7.57191
114.725	951	2	7.37	7.63655
114.779	952	2	7.437	7.70123
114.859	953	2	7.504	7.76595
114.969	954	2	7.571	7.83071
115.049	955	2	7.638	7.89551
115.199	956	2	7.705	7.96034
115.264	957	2	7.772	8.02521
115.333	958	2	7.839	8.09011
115.448	959	2	7.906	8.15505
115.483	960	2	7.973	8.22002
115.537	961	2	8.04	8.28502
115.632	962	2	8.107	8.35006
115.677	963	2	8.174	8.41512
115.747	964	2	8.241	8.48022
115.851	965	2	8.308	8.54534
115.921	966	2	8.375	8.6105
116.016	967	2	8.442	8.67568
116.096	968	2	8.509	8.74089
116.151	969	2	8.576	8.80612
116.206	970	2	8.643	8.87138
116.301	971	2	8.71	8.93667
116.475	972	2	8.777	9.00198
116.54	973	2	8.844	9.06732
116.625	974	2	8.911	9.13268
116.685	975	2	8.978	9.19807
116.745	976	2	9.045	9.26348
116.863	977	2	9.112	9.32891
116.954	978	2	9.179	9.39436
117.014	979	2	9.246	9.45984
117.079	980	2	9.313	9.52533
117.185	981	2	9.38	9.59085
117.245	982	2	9.447	9.65639
117.313	983	2	9.514	9.72194
117.349	984	2	9.581	9.78752
117.47	985	2	9.648	9.85312
117.583	986	2	9.715	9.91873
117.695	987	2	9.782	9.98436
117.774	988	2	9.849	10.05
117.889	989	2	9.916	10.1157
117.983	990	2	9.983	10.1814
118.068	991	2	10.05	10.2471
118.152	992	2	10.117	10.3128
118.236	993	2	10.184	10.3785
118.331	994	2	10.251	10.4443
118.425	995	2	10.318	10.51
118.519	996	2	10.385	10.5758
118.588	997	2	10.452	10.6416
118.658	998	2	10.519	10.7074
118.748	999	2	10.586	10.7733
118.833	1000	2	10.653	10.8391
118.996	1001	2	10.72	10.905
119.081	1002	2	10.787	10.9708
119.179	1003	2	10.854	11.0367
119.258	1004	2	10.921	11.1026
119.347	1005	2	10.988	11.1685
119.421	1006	2	11.055	11.2345
119.51	1007	2	11.122	11.3004
119.613	1008	2	11.189	11.3663
119.668	1009	2	11.256	11.4323
119.717	1010	2	11.323	11.4983
119.821	1011	2	11.39	11.5643
119.904	1012	2	11.457	11.6303
120.003	1013	2	11.524	11.6963
120.106	1014	2	11.591	11.7623
120.18	1015	2	11.658	11.8283
120.24	1016	2	11.725	11.8944
120.343	1017	2	11.792	11.9604
120.422	1018	2	11.859	12.0265
120.501	1019	2	11.926	12.0925
120.57	1020	2	11.993	12.1586
120.609	1021	2	12.06	12.2247
120.688	1022	2	12.127	12.2908
120.831	1023	2	12.194	12.3569
120.93	1024	2	12.261	12.423
121.004	1025	2	12.328	12.4892
121.063	1026	2	12.395	12.5553
121.167	1027	2	12.462	12.6215
121.226	1028	2	12.529	12.6876
121.281	1029	2	12.596	12.7538
121.36	1030	2	12.663	12.82
121.424	1031	2	12.73	12.8862
121.483	1032	2	12.797	12.9523
121.558	1033	2	12.864	13.0185
121.637	1034	2	12.931	13.0848
121.761	1035	2	12.998	13.151
121.835	1036	2	13.065	13.2172
121.91	1037	2	13.132	13.2834
122.009	1038	2	13.199	13.3497
122.109	1039	2	13.266	13.4159
122.178	1040	2	13.333	13.4822
122.278	1041	2	13.4	13.5484
122.368	1042	2	13.467	13.6147
122.423	1043	2	13.534	13.681
122.493	1044	2	13.601	13.7473
122.588	1045	2	13.668	13.8136
122.638	1046	2	13.735	13.8798
122.774	1047	2	13.802	13.9462
122.859	1048	2	13.869	14.0125
122.944	1049	2	13.936	14.0788
123.065	1050	2	14.003	14.1451
123.155	1051	2	14.07	14.2114
123.246	1052	2	14.137	14.2778
123.327	1053	2	14.204	14.3441
123.408	1054	2	14.271	14.4105
123.473	1055	2	14.271	14.4105
123.589	1056	2	14.204	14.3441
123.66	1057	2	14.137	14.2778
123.771	1058	2	14.07	14.2114
123.842	1059	2	14.003	14.1451
123.927	1060	2	13.936	14.0788
124.089	1061	2	13.869	14.0125
124.185	1062	2	13.802	13.9462
124.311	1063	2	13.735	13.8798
124.402	1064	2	13.668	13.8136
124.493	1065	2	13.601	13.7473
124.554	1066	2	13.534	13.681
124.614	1067	2	13.467	13.6147
124.66	1068	2	13.4	13.5484
124.736	1069	2	13.333	13.4822
124.816	1070	2	13.266	13.4159
124.892	1071	2	13.199	13.3497
124.978	1072	2	13.132	13.2834
125.058	1073	2	13.065	13.2172
125.129	1074	2	12.998	13.151
125.265	1075	2	12.931	13.0848
125.325	1076	2	12.864	13.0185
125.401	1077	2	12.797	12.9523
125.497	1078	2	12.73	12.8862
125.572	1079	2	12.663	12.82
125.693	1080	2	12.596	12.7538
125.763	1081	2	12.529	12.6876
125.864	1082	2	12.462	12.6215
125.959	1083	2	12.395	12.5553
126.034	1084	2	12.328	12.4892
126.114	1085	2	12.261	12.423
126.21	1086	2	12.194	12.3569
126.304	1087	2	12.127	12.2908
126.354	1088	2	12.06	12.2247
126.399	1089	2	11.993	12.1586
126.468	1090	2	11.926	12.0925
126.531	1091	2	11.859	12.0265
126.602	1092	2	11.792	11.9604
126.734	1093	2	11.725	11.8944
126.834	1094	2	11.658	11.8283
126.969	1095	2	11.591	11.7623
127.064	1096	2	11.524	11.6963
127.148	1097	2	11.457	11.6303
127.277	1098	2	11.39	11.5643
127.376	1099	2	11.323	11.4983
127.45	1100	2	11.256	11.4323
127.515	1101	2	11.189	11.3663
127.584	1102	2	11.122	11.3004
127.649	1103	2	11.055	11.2345
127.728	1104	2	10.988	11.1685
127.787	1105	2	10.921	11.1026
127.871	1106	2	10.854	11.0367
127.94	1107	2	10.787	10.9708
127.999	1108	2	10.72	10.905
128.034	1109	2	10.653	10.8391
128.098	1110	2	10.586	10.7733
128.178	1111	2	10.519	10.7074
128.316	1112	2	10.452	10.6416
128.395	1113	2	10.385	10.5758
128.489	1114	2	10.318	10.51
128.583	1115	2	10.251	10.4443
128.682	1116	2	10.184	10.3785
128.771	1117	2	10.117	10.3128
128.869	1118	2	10.05	10.2471
128.949	1119	2	9.983	10.1814
129.038	1120	2	9.916	10.1157
129.128	1121	2	9.849	10.05
129.197	1122	2	9.782	9.98436
129.262	1123	2	9.715	9.91873
129.342	1124	2	9.648	9.85312
129.402	1125	2	9.581	9.78752
129.467	1126	2	9.514	9.72194
129.552	1127	2	9.447	9.65639
129.632	1128	2	9.38	9.59085
129.732	1129	2	9.313	9.52533
129.807	1130	2	9.246	9.45984
129.912	1131	2	9.179	9.39436
129.998	1132	2	9.112	9.32891
130.048	1133	2	9.045	9.26348
130.103	1134	2	8.978	9.19807
130.168	1135	2	8.911	9.13268
130.249	1136	2	8.844	9.06732
130.314	1137	2	8.777	9.00198
130.42	1138	2	8.71	8.93667
130.545	1139	2	8.643	8.87138
130.631	1140	2	8.576	8.80612
130.696	1141	2	8.509	8.74089
130.772	1142	2	8.442	8.67568
130.883	1143	2	8.375	8.6105
130.973	1144	2	8.308	8.54534
131.054	1145	2	8.241	8.48022
131.124	1146	2	8.174	8.41512
131.215	1147	2	8.107	8.35006
131.286	1148	2	8.04	8.28502
131.351	1149	2	7.973	8.22002
131.437	1150	2	7.906	8.15505
131.533	1151	2	7.839	8.09011
131.633	1152	2	7.772	8.02521
131.749	1153	2	7.705	7.96034
131.835	1154	2	7.638	7.89551
131.921	1155	2	7.571	7.83071
132.003	1156	2	7.504	7.76595
132.068	1157	2	7.437	7.70123
132.16	1158	2	7.37	7.63655
132.21	1159	2	7.303	7.57191
132.281	1160	2	7.236	7.50731
132.357	1161	2	7.169	7.44275
132.423	1162	2	7.102	7.37824
132.498	1163	2	7.035	7.31377
132.579	1164	2	6.968	7.24935
132.68	1165	2	6.901	7.18497
132.751	1166	2	6.834	7.12064
132.822	1167	2	6.767	7.05637
132.877	1168	2	6.7	6.99214
132.968	1169	2	6.633	6.92796
133.084	1170	2	6.566	6.86384
133.19	1171	2	6.499	6.79978
133.276	1172	2	6.432	6.73577
133.377	1173	2	6.365	6.67182
133.443	1174	2	6.298	6.60793
133.519	1175	1	6.231	6.31073
133.604	1176	1	6.164	6.24459
133.67	1177	2	6.097	6.41665
133.766	1178	2	6.03	6.35302
133.841	1179	2	5.963	6.28946
133.932	1180	2	5.896	6.22598
134.007	1181	2	5.829	6.16257
134.073	1182	2	5.762	6.09923
134.174	1183	2	5.695	6.03598
134.234	1184	2	5.628	5.9728
134.314	1185	2	5.561	5.90971
134.43	1186	2	5.494	5.84671
134.511	1187	2	5.427	5.7838
134.581	1188	2	5.36	5.72098
134.657	1189	2	5.293	5.65825
134.757	1190	2	5.226	5.59563
134.862	1191	2	5.159	5.53311
134.928	1192	2	5.092	5.47069
134.998	1193	2	5.025	5.40838
135.038	1194	2	4.958	5.34619
135.098	1195	2	4.891	5.28412
135.143	1196	2	4.824	5.22216
135.199	1197	2	4.757	5.16033
135.268	1198	2	4.69	5.09864
135.363	1199	2	4.623	5.03708
135.423	1200	2.1	4.556	5.01669
135.483	1201	2.1	4.489	4.95592
135.573	1202	2.1	4.422	4.89531
135.678	1203	2.1	4.355	4.83488
135.708	1204	2.1	4.288	4.77461
135.773	1205	2.1	4.221	4.71454
135.857	1206	2.1	4.154	4.65464
135.957	1207	2.1	4.087	4.59495
136.017	1208	2.1	4.02	4.53546
136.112	1209	2.1	3.953	4.47618
136.142	1210	2.1	3.886	4.41713
136.236	1211	2.1	3.819	4.3583
136.326	1212	2.1	3.752	4.29971
136.391	1213	2.1	3.685	4.24137
136.465	1214	2.1	3.618	4.18329
136.545	1215	2.1	3.551	4.12548
136.624	1216	2.1	3.484	4.06795
136.694	1217	2.1	3.417	4.01072
136.768	1218	2.1	3.35	3.9538
136.843	1219	2.1	3.283	3.89719
136.922	1220	2.1	3.216	3.84092
136.977	1221	2.1	3.149	3.785
137.08	1222	2.1	3.082	3.72944
137.164	1223	2.1	3.015	3.67427
137.224	1224	2.1	2.948	3.61949
137.313	1225	2.1	2.881	3.56513
137.402	1226	2.1	2.814	3.51121
137.536	1227	2.1	2.747	3.45775
137.581	1228	2.1	2.68	3.40476
137.734	1229	2.1	2.613	3.35228
137.833	1230	2.1	2.546	3.30032
137.907	1231	2.1	2.479	3.24891
138.011	1232	2.1	2.412	3.19808
138.081	1233	2.1	2.345	3.14786
138.136	1234	2.1	2.278	3.09827
138.205	1235	2.1	2.211	3.04935
138.289	1236	2.1	2.144	3.00112
138.338	1237	2.1	2.077	2.95363
138.423	1238	2.1	2.01	2.90691
138.477	1239	2.1	1.943	2.86099
138.547	1240	2.1	1.876	2.81591
138.591	1241	2.1	1.809	2.77173
138.646	1242	2.1	1.742	2.72847
138.731	1243	2.1	1.675	2.68619
138.825	1244	2.2	1.608	2.72501
138.914	1245	2.2	1.541	2.68602
139.038	1246	2.2	1.474	2.64815
139.088	1247	2.2	1.407	2.61145
139.173	1248	2.2	1.34	2.57597
139.262	1249	2.2	1.273	2.54176
139.361	1250	2.2	1.206	2.50887
139.451	1251	2.2	1.139	2.47736
139.525	1252	2.2	1.072	2.44728
139.589	1253	2.2	1.005	2.41868
139.669	1254	2.2	0.938	2.39162
139.768	1255	2.2	0.871	2.36614
139.833	1256	2.2	0.804	2.34231
139.893	1257	2.2	0.737	2.32017
139.973	1258	2.2	0.67	2.29976
140.038	1259	2.2	0.603	2.28114
140.138	1260	2.2	0.536	2.26435
140.208	1261	2.2	0.469	2.24944
140.253	1262	2.2	0.402	2.23643
140.358	1263	2.2	0.335	2.22536
140.443	1264	2.2	0.268	2.21626
140.518	1265	2.2	0.201	2.20916
140.618	1266	2.2	0.134	2.20408
140.673	1267	2.2	0.067	2.20102
140.708	1268	2.2	0	2.2
140.808	1269	2.2	0.067	2.20102
140.898	1270	2.2	0.134	2.20408
140.958	1271	2.2	0.201	2.20916
141.018	1272	2.2	0.268	2.21626
141.123	1273	2.2	0.335	2.22536
141.188	1274	2.2	0.402	2.23643
141.262	1275	2.2	0.469	2.24944
141.322	1276	2.2	0.536	2.26435
141.402	1277	2.2	0.603	2.28114
141.487	1278	2.2	0.67	2.29976
141.587	1279	2.2	0.737	2.32017
141.657	1280	2.2	0.804	2.34231
141.706	1281	2.2	0.871	2.36614
141.766	1282	2.2	0.938	2.39162
141.841	1283	2.2	1.005	2.41868
141.906	1284	2.2	1.072	2.44728
141.996	1285	2.2	1.139	2.47736
142.08	1286	2.2	1.206	2.50887
142.14	1287	2.2	1.273	2.54176
142.225	1288	2.3	1.34	2.66188
142.3	1289	2.3	1.407	2.69623
142.384	1290	2.3	1.474	2.73179
142.454	1291	2.3	1.541	2.76852
142.518	1292	2.3	1.608	2.80636
142.623	1293	2.3	1.675	2.84528
142.678	1294	2.3	1.742	2.88523
142.762	1295	2.3	1.809	2.92617
142.837	1296	2.3	1.876	2.96806
142.916	1297	2.3	1.943	3.01086
142.981	1298	2.3	2.01	3.05452
143.041	1299	2.3	2.077	3.09902
143.15	1300	2.3	2.144	3.14432
143.22	1301	2.3	2.211	3.19038
143.319	1302	2.3	2.278	3.23717
143.374	1303	2.3	2.345	3.28467
143.473	1304	2.3	2.412	3.33283
143.568	1305	2.3	2.479	3.38163
143.637	1306	2.3	2.546	3.43105
143.722	1307	2.3	2.613	3.48106
143.786	1308	2.3	2.68	3.53163
143.901	1309	2.3	2.747	3.58274
143.985	1310	2.3	2.814	3.63436
144.075	1311	2.3	2.881	3.68648
144.165	1312	2.3	2.948	3.73908
144.214	1313	2.3	3.015	3.79213
144.299	1314	2.3	3.082	3.84561
144.413	1315	2.3	3.149	3.89951
144.482	1316	2.3	3.216	3.95382
144.552	1317	2.3	3.283	4.0085
144.632	1318	2.3	3.35	4.06356
144.696	1319	2.3	3.417	4.11897
144.766	1320	2.3	3.484	4.17472
144.871	1321	2.3	3.551	4.23079
144.971	1322	2.3	3.551	4.23079
145.026	1323	2.3	3.484	4.17472
145.091	1324	2.3	3.417	4.11897
145.161	1325	2.3	3.35	4.06356
145.24	1326	2.3	3.283	4.0085
145.315	1327	2.3	3.216	3.95382
145.36	1328	2.3	3.149	3.89951
145.459	1329	2.3	3.082	3.84561
145.524	1330	2.3	3.015	3.79213
145.614	1331	2.3	2.948	3.73908
145.693	1332	2.4	2.881	3.74969
145.777	1333	2.4	2.814	3.69846
145.87	1334	2.4	2.747	3.64774
145.955	1335	2.4	2.68	3.59755
146.095	1336	2.4	2.613	3.54792
146.2	1337	2.4	2.546	3.49887
146.265	1338	2.4	2.479	3.45043
146.315	1339	2.4	2.412	3.40261
146.39	1340	2.4	2.345	3.35545
146.435	1341	2.4	2.278	3.30897
146.505	1342	2.4	2.211	3.26321
146.576	1343	2.4	2.144	3.21819
146.646	1344	2.4	2.077	3.17395
146.707	1345	2.4	2.01	3.13051
146.753	1346	2.4	1.943	3.08792
146.83	1347	2.4	1.876	3.04621
146.877	1348	2.4	1.809	3.00541
146.938	1349	2.4	1.742	2.96556
146.989	1350	2.4	1.675	2.92671
147.04	1351	2.4	1.608	2.88889
147.136	1352	2.4	1.541	2.85214
147.212	1353	2.4	1.474	2.8165
147.309	1354	2.4	1.407	2.78202
147.39	1355	2.4	1.34	2.74875
147.456	1356	2.4	1.273	2.71671
147.598	1357	2.4	1.206	2.68597
147.664	1358	2.4	1.139	2.65656
147.796	1359	2.4	1.072	2.62853
147.856	1360	2.4	1.005	2.60193
147.932	1361	2.4	0.938	2.57679
148.024	1362	2.4	0.871	2.55316
148.069	1363	2.4	0.804	2.53109
148.125	1364	2.4	0.737	2.51061
148.196	1365	2.4	0.67	2.49177
148.257	1366	2.4	0.603	2.47459
148.332	1367	2.4	0.536	2.45913
148.393	1368	2.4	0.469	2.4454
148.463	1369	2.4	0.402	2.43343
148.548	1370	2.4	0.335	2.42327
148.633	1371	2.4	0.268	2.41492
148.688	1372	2.4	0.201	2.4084
148.773	1373	2.4	0.134	2.40374
148.833	1374	2.4	0.067	2.40094
148.898	1375	2.4	0	2.4
148.973	1376	2.5	0.067	2.5009
149.028	1377	2.5	0.134	2.50359
149.083	1378	2.5	0.201	2.50807
149.168	1379	2.5	0.268	2.51432
149.302	1380	2.5	0.335	2.52235
149.411	1381	2.5	0.402	2.53211
149.485	1382	2.5	0.469	2.54361
149.575	1383	2.5	0.536	2.55681
149.654	1384	2.5	0.603	2.57169
149.738	1385	2.5	0.67	2.58822
149.87	1386	2.5	0.737	2.60637
149.965	1387	2.5	0.804	2.6261
150.035	1388	2.5	0.871	2.64738
150.124	1389	2.5	0.938	2.67018
150.178	1390	2.5	1.005	2.69444
150.208	1391	2.5	1.072	2.72014
150.286	1392	2.5	1.139	2.74724
150.345	1393	2.5	1.139	2.74724
150.424	1394	2.5	1.072	2.72014
150.454	1395	2.5	1.005	2.69444
150.578	1396	2.5	0.938	2.67018
150.692	1397	2.5	0.871	2.64738
150.771	1398	2.5	0.804	2.6261
150.85	1399	2.5	0.737	2.60637
150.939	1400	2.5	0.67	2.58822
151.029	1401	2.5	0.603	2.57169
151.073	1402	2.5	0.536	2.55681
151.113	1403	2.5	0.469	2.54361
151.197	1404	2.5	0.402	2.53211
151.277	1405	2.5	0.335	2.52235
151.312	1406	2.5	0.268	2.51432
151.367	1407	2.5	0.201	2.50807
151.43	1408	2.5	0.134	2.50359
151.507	1409	2.5	0.067	2.5009
151.575	1410	2.5	0	2.5
151.666	1411	2.5	0.067	2.5009
151.755	1412	2.5	0.134	2.50359
151.83	1413	2.5	0.201	2.50807
151.91	1414	2.5	0.268	2.51432
151.975	1415	2.5	0.335	2.52235
152.093	1416	2.5	0.402	2.53211
152.184	1417	2.5	0.469	2.54361
152.244	1418	2.5	0.536	2.55681
152.34	1419	2.5	0.603	2.57169
152.405	1420	2.6	0.67	2.68494
152.466	1421	2.6	0.737	2.70244
152.561	1422	2.6	0.804	2.72147
152.632	1423	2.6	0.871	2.74201
152.717	1424	2.6	0.938	2.76403
152.763	1425	2.6	1.005	2.78748
152.843	1426	2.6	1.072	2.81233
152.904	1427	2.6	1.139	2.83854
152.995	1428	2.6	1.206	2.86608
153.045	1429	2.6	1.273	2.89491
153.121	1430	2.6	1.34	2.925
153.195	1431	2.6	1.407	2.95629
153.243	1432	2.6	1.474	2.98876
153.354	1433	2.6	1.541	3.02236
153.455	1434	2.6	1.608	3.05707
153.506	1435	2.6	1.675	3.09283
153.592	1436	2.6	1.742	3.12963
153.647	1437	2.6	1.809	3.16741
153.703	1438	2.6	1.876	3.20615
153.805	1439	2.6	1.943	3.2458
153.875	1440	2.6	2.01	3.28635
153.962	1441	2.6	2.077	3.32775
154.063	1442	2.6	2.144	3.36998
154.109	1443	2.6	2.211	3.41299
154.17	1444	2.6	2.278	3.45677
154.251	1445	2.6	2.345	3.50129
154.332	1446	2.6	2.412	3.54651
154.428	1447	2.6	2.479	3.59241
154.494	1448	2.6	2.546	3.63897
154.57	1449	2.6	2.613	3.68616
154.636	1450	2.6	2.68	3.73395
154.702	1451	2.6	2.747	3.78233
154.799	1452	2.6	2.814	3.83127
154.829	1453	2.6	2.881	3.88074
154.91	1454	2.6	2.948	3.93074
155.002	1455	2.6	3.015	3.98123
155.083	1456	2.6	3.082	4.03221
155.165	1457	2.6	3.149	4.08365
155.247	1458	2.6	3.216	4.13554
155.323	1459	2.6	3.283	4.18785
155.384	1460	2.6	3.35	4.24058
155.466	1461	2.6	3.417	4.2937
155.542	1462	2.6	3.484	4.34721
155.593	1463	2.6	3.551	4.40109
155.684	1464	2.7	3.484	4.40775
155.72	1465	2.7	3.417	4.35498
155.755	1466	2.7	3.35	4.30262
155.811	1467	2.7	3.283	4.25066
155.892	1468	2.7	3.216	4.19913
155.973	1469	2.7	3.149	4.14804
156.044	1470	2.7	3.082	4.0974
156.125	1471	2.7	3.015	4.04725
156.186	1472	2.7	2.948	3.99759
156.227	1473	2.7	2.881	3.94844
156.288	1474	2.7	2.814	3.89982
156.364	1475	2.7	2.747	3.85175
156.395	1476	2.7	2.68	3.80426
156.435	1477	2.7	2.613	3.75736
156.476	1478	2.7	2.546	3.71108
156.532	1479	2.7	2.479	3.66544
156.613	1480	2.7	2.412	3.62046
156.658	1481	2.7	2.345	3.57617
156.729	1482	2.7	2.278	3.5326
156.815	1483	2.7	2.211	3.48977
156.876	1484	2.7	2.144	3.44771
156.972	1485	2.7	2.077	3.40645
157.038	1486	2.7	2.01	3.36602
157.145	1487	2.7	1.943	3.32645
157.251	1488	2.7	1.876	3.28776
157.333	1489	2.7	1.809	3.25
157.388	1490	2.7	1.742	3.21319
157.414	1491	2.7	1.675	3.17736
157.5	1492	2.7	1.608	3.14256
157.545	1493	2.7	1.541	3.10881
157.601	1494	2.7	1.474	3.07615
157.697	1495	2.7	1.407	3.04461
157.752	1496	2.7	1.34	3.01423
157.798	1497	2.7	1.273	2.98505
157.878	1498	2.7	1.206	2.9571
157.933	1499	2.7	1.139	2.93041
157.974	1500	2.7	1.072	2.90503
158.049	1501	2.7	1.005	2.88098
158.109	1502	2.7	0.938	2.85829
158.2	1503	2.7	0.871	2.83701
158.25	1504	2.7	0.804	2.81716
158.376	1505	2.7	0.737	2.79878
158.472	1506	2.7	0.67	2.78189
158.557	1507	2.7	0.603	2.76652
158.658	1508	2.8	0.536	2.85084
158.708	1509	2.8	0.469	2.83901
158.753	1510	2.8	0.402	2.82871
158.883	1511	2.8	0.335	2.81997
158.958	1512	2.8	0.268	2.8128
159.004	1513	2.8	0.201	2.80721
159.053	1514	2.8	0.134	2.8032
159.183	1515	2.8	0.067	2.8008
159.288	1516	2.8	0	2.8
159.352	1517	2.8	0.067	2.8008
159.416	1518	2.8	0.134	2.8032
159.505	1519	2.8	0.201	2.80721
159.573	1520	2.8	0.268	2.8128
159.687	1521	2.8	0.335	2.81997
159.726	1522	2.8	0.402	2.82871
159.834	1523	2.8	0.469	2.83901
159.913	1524	2.8	0.536	2.85084
159.977	1525	2.8	0.603	2.86419
160.061	1526	2.8	0.67	2.87904
160.13	1527	2.8	0.737	2.89537
160.209	1528	2.8	0.804	2.91315
160.258	1529	2.8	0.871	2.93234
160.317	1530	2.8	0.938	2.95294
160.362	1531	2.8	1.005	2.9749
160.431	1532	2.8	1.072	2.9982
160.51	1533	2.8	1.139	3.0228
160.559	1534	2.8	1.206	3.04868
160.643	1535	2.8	1.273	3.0758
160.717	1536	2.8	1.34	3.10413
160.781	1537	2.8	1.407	3.13363
160.826	1538	2.8	1.474	3.16428
160.885	1539	2.8	1.541	3.19604
160.959	1540	2.8	1.608	3.22888
161.014	1541	2.8	1.675	3.26276
161.093	1542	2.8	1.742	3.29766
161.163	1543	2.8	1.809	3.33354
161.272	1544	2.8	1.876	3.37037
161.346	1545	2.8	1.943	3.40812
161.465	1546	2.8	2.01	3.44675
161.51	1547	2.8	2.077	3.48625
161.589	1548	2.8	2.144	3.52658
161.653	1549	2.8	2.211	3.56771
161.763	1550	2.8	2.278	3.60961
161.822	1551	2.8	2.345	3.65226
161.911	1552	2.9	2.412	3.77197
161.966	1553	2.9	2.479	3.81516
162.056	1554	2.9	2.546	3.85903
162.15	1555	2.9	2.613	3.90356
162.195	1556	2.9	2.68	3.94872
162.269	1557	2.9	2.747	3.9945
162.354	1558	2.9	2.814	4.04087
162.409	1559	2.9	2.881	4.08781
162.478	1560	2.9	2.948	4.1353
162.568	1561	2.9	3.015	4.18333
162.628	1562	2.9	3.082	4.23187
162.687	1563	2.9	3.149	4.28091
162.742	1564	2.9	3.216	4.33043
162.827	1565	2.9	3.283	4.38042
162.901	1566	2.9	3.35	4.43086
162.981	1567	2.9	3.417	4.48173
163.051	1568	2.9	3.484	4.53302
163.111	1569	2.9	3.551	4.58471
163.186	1570	2.9	3.618	4.6368
163.24	1571	2.9	3.685	4.68927
163.315	1572	2.9	3.752	4.7421
163.375	1573	2.9	3.819	4.79529
163.445	1574	2.9	3.886	4.84881
163.49	1575	2.9	3.953	4.90267
163.57	1576	2.9	4.02	4.95685
163.654	1577	2.9	4.087	5.01134
163.724	1578	2.9	4.154	5.06613
163.824	1579	2.9	4.221	5.12121
163.889	1580	2.9	4.288	5.17658
163.969	1581	2.9	4.355	5.23221
164.039	1582	2.9	4.422	5.28811
164.129	1583	2.9	4.489	5.34426
164.209	1584	2.9	4.556	5.40066
164.248	1585	2.9	4.623	5.4573
164.353	1586	2.9	4.69	5.51417
164.452	1587	2.9	4.757	5.57127
164.522	1588	2.9	4.824	5.62859
164.603	1589	2.9	4.891	5.68611
164.658	1590	2.9	4.958	5.74385
164.778	1591	2.9	5.025	5.80178
164.887	1592	2.9	5.092	5.8599
164.963	1593	2.9	5.159	5.91822
165.028	1594	2.9	5.226	5.97671
165.078	1595	2.9	5.293	6.03538
165.178	1596	3	5.36	6.14244
165.233	1597	3	5.427	6.20099
165.333	1598	3	5.494	6.25972
165.383	1599	3	5.561	6.3186
165.461	1600	3	5.628	6.37765
165.553	1601	3	5.695	6.43685
165.593	1602	3	5.762	6.4962
165.65	1603	3	5.829	6.5557
165.73	1604	3	5.896	6.61535
165.81	1605	3	5.963	6.67513
165.887	1606	3	6.03	6.73505
165.941	1607	3	6.097	6.7951
165.998	1608	3	6.164	6.85528
166.088	1609	3	6.231	6.91559
166.18	1610	3	6.298	6.97602
166.266	1611	3	6.365	7.03656
166.345	1612	3	6.432	7.09723
166.444	1613	3	6.499	7.158
166.516	1614	3	6.566	7.21889
166.618	1615	3	6.633	7.27988
166.698	1616	3	6.7	7.34098
166.768	1617	3	6.767	7.40218
166.842	1618	3	6.834	7.46348
166.921	1619	3	6.901	7.52488
166.975	1620	3	6.968	7.58637
167.025	1621	3	7.035	7.64796
167.079	1622	3	7.102	7.70963
167.172	1623	3	7.169	7.77139
167.284	1624	3	7.236	7.83324
167.352	1625	3	7.303	7.89518
167.42	1626	3	7.37	7.95719
167.507	1627	3	7.437	8.01929
167.618	1628	3	7.504	8.08146
167.667	1629	3	7.571	8.14371
167.72	1630	3	7.638	8.20604
167.779	1631	3	7.571	8.14371
167.895	1632	3	7.504	8.08146
167.968	1633	3	7.437	8.01929
168.056	1634	3	7.37	7.95719
168.124	1635	3	7.303	7.89518
168.178	1636	3	7.236	7.83324
168.252	1637	3	7.169	7.77139
168.306	1638	3	7.102	7.70963
168.38	1639	3	7.035	7.64796
168.454	1640	3	6.968	7.58637
168.548	1641	3.1	6.901	7.5653
168.593	1642	3.1	6.834	7.50424
168.658	1643	3.1	6.767	7.44327
168.718	1644	3.1	6.7	7.38241
168.788	1645	3.1	6.633	7.32166
168.858	1646	3.1	6.566	7.26102
169.023	1647	3.1	6.499	7.20049
169.078	1648	3.1	6.432	7.14007
169.149	1649	3.1	6.365	7.07978
169.25	1650	3.1	6.298	7.0196
169.315	1651	3.1	6.231	6.95955
169.432	1652	3.1	6.164	6.89963
169.514	1653	3.1	6.097	6.83984
169.57	1654	3.1	6.03	6.78018
169.673	1655	3.1	5.963	6.72067
169.745	1656	3.1	5.896	6.66129
169.817	1657	3.1	5.829	6.60206
169.889	1658	3.1	5.762	6.54298
169.972	1659	3.1	5.695	6.48406
170.039	1660	3.1	5.628	6.42529
170.116	1661	3.1	5.561	6.36669
170.178	1662	3.1	5.494	6.30825
170.255	1663	3.1	5.427	6.24999
170.369	1664	3.1	5.36	6.1919
170.415	1665	3.1	5.293	6.13399
170.487	1666	3.1	5.226	6.07627
170.554	1667	3.1	5.159	6.01874
170.652	1668	3.1	5.092	5.96141
170.729	1669	3.1	5.025	5.90429
170.801	1670	3.1	4.958	5.84737
170.867	1671	3.1	4.891	5.79067
170.913	1672	3.1	4.824	5.73419
171.015	1673	3.1	4.757	5.67794
171.076	1674	3.1	4.69	5.62193
171.131	1675	3.1	4.623	5.56616
171.243	1676	3.1	4.556	5.51064
171.293	1677	3.1	4.489	5.45538
171.378	1678	3.1	4.422	5.40038
171.438	1679	3.1	4.355	5.34565
171.515	1680	3.1	4.288	5.29121
171.583	1681	3.1	4.221	5.23706
171.647	1682	3.1	4.154	5.18321
171.743	1683	3.1	4.087	5.12968
171.808	1684	3.1	4.02	5.07646
171.902	1685	3.2	3.953	5.08588
171.976	1686	3.2	3.886	5.03398
172.054	1687	3.2	3.819	4.98245
172.133	1688	3.2	3.752	4.93128
172.167	1689	3.2	3.685	4.88049
172.226	1690	3.2	3.618	4.83011
172.304	1691	3.2	3.551	4.78013
172.397	1692	3.2	3.484	4.73057
172.446	1693	3.2	3.417	4.68144
172.504	1694	3.2	3.35	4.63276
172.597	1695	3.2	3.283	4.58455
172.67	1696	3.2	3.216	4.53681
172.757	1697	3.2	3.149	4.48957
172.858	1698	3.2	3.082	4.44283
172.936	1699	3.2	3.015	4.39662
173.028	1700	3.2	2.948	4.35094
173.067	1701	3.2	2.881	4.30583
173.194	1702	3.2	2.814	4.26129
173.238	1703	3.2	2.747	4.21735
173.311	1704	3.2	2.68	4.17401
173.405	1705	3.2	2.613	4.13132
173.469	1706	3.2	2.546	4.08927
173.577	1707	3.2	2.479	4.04789
173.657	1708	3.2	2.412	4.00721
173.722	1709	3.2	2.345	3.96724
173.767	1710	3.2	2.278	3.92801
173.822	1711	3.2	2.211	3.88954
173.943	1712	3.2	2.144	3.85185
174.052	1713	3.2	2.077	3.81496
174.153	1714	3.2	2.01	3.7789
174.228	1715	3.2	1.943	3.74369
174.328	1716	3.2	1.876	3.70936
174.398	1717	3.2	1.809	3.67593
174.473	1718	3.2	1.742	3.64343
174.534	1719	3.2	1.675	3.61187
174.635	1720	3.2	1.608	3.58129
174.73	1721	3.2	1.541	3.55172
174.841	1722	3.2	1.474	3.52316
174.956	1723	3.2	1.407	3.49566
175.012	1724	3.2	1.34	3.46924
175.122	1725	3.2	1.273	3.44391
175.187	1726	3.2	1.206	3.41971
175.323	1727	3.2	1.139	3.39666
175.408	1728	3.2	1.072	3.37479
175.478	1729	3.3	1.005	3.44964
175.549	1730	3.3	0.938	3.43072
175.604	1731	3.3	0.871	3.41301
175.644	1732	3.3	0.804	3.39653
175.734	1733	3.3	0.737	3.3813
175.799	1734	3.3	0.67	3.36733
175.889	1735	3.3	0.603	3.35464
175.98	1736	3.3	0.536	3.34325
176.048	1737	3.3	0.469	3.33316
176.088	1738	3.3	0.402	3.3244
176.163	1739	3.3	0.335	3.31696
176.253	1740	3.3	0.268	3.31086
176.308	1741	3.3	0.201	3.30612
176.393	1742	3.3	0.134	3.30272
176.432	1743	3.3	0.067	3.30068
176.562	1744	3.3	0	3.3
176.667	1745	3.3	0.067	3.30068
176.738	1746	3.3	0.134	3.30272
176.807	1747	3.3	0.201	3.30612
176.892	1748	3.3	0.268	3.31086
176.957	1749	3.3	0.335	3.31696
177.017	1750	3.3	0.402	3.3244
177.106	1751	3.3	0.469	3.33316
177.181	1752	3.3	0.536	3.34325
177.266	1753	3.3	0.603	3.35464
177.355	1754	3.3	0.67	3.36733
177.429	1755	3.3	0.737	3.3813
177.499	1756	3.3	0.804	3.39653
177.588	1757	3.3	0.871	3.41301
177.672	1758	3.3	0.938	3.43072
177.757	1759	3.3	1.005	3.44964
177.871	1760	3.3	1.072	3.46975
177.981	1761	3.3	1.139	3.49103
178.037	1762	3.3	1.206	3.51346
178.116	1763	3.3	1.139	3.49103
178.197	1764	3.3	1.072	3.46975
178.286	1765	3.3	1.005	3.44964
178.41	1766	3.3	0.938	3.43072
178.504	1767	3.3	0.871	3.41301
178.599	1768	3.3	0.804	3.39653
178.688	1769	3.3	0.737	3.3813
178.733	1770	3.3	0.67	3.36733
178.808	1771	3.3	0.603	3.35464
178.888	1772	3.3	0.536	3.34325
178.982	1773	3.4	0.469	3.43219
179.062	1774	3.4	0.402	3.42368
179.12	1775	3.4	0.335	3.41646
179.192	1776	3.4	0.268	3.41055
179.26	1777	3.4	0.201	3.40594
179.317	1778	3.4	0.134	3.40264
179.368	1779	3.4	0.067	3.40066
179.478	1780	3.4	0	3.4
179.578	1781	3.4	0.067	3.40066
179.643	1782	3.4	0.134	3.40264
179.743	1783	3.4	0.201	3.40594
179.843	1784	3.4	0.268	3.41055
179.898	1785	3.4	0.335	3.41646
179.964	1786	3.4	0.402	3.42368
180.019	1787	3.4	0.469	3.43219
180.125	1788	3.4	0.536	3.44199
180.235	1789	3.4	0.603	3.45306
180.346	1790	3.4	0.67	3.46539
180.412	1791	3.4	0.737	3.47896
180.477	1792	3.4	0.804	3.49377
180.573	1793	3.4	0.871	3.50979
180.715	1794	3.4	0.938	3.52702
180.836	1795	3.4	1.005	3.54542
180.892	1796	3.4	1.072	3.56499
180.983	1797	3.4	1.139	3.58571
181.049	1798	3.4	1.206	3.60755
181.146	1799	3.4	1.273	3.6305
181.272	1800	3.4	1.34	3.65453
181.374	1801	3.4	1.407	3.67963
181.46	1802	3.4	1.474	3.70576
181.516	1803	3.4	1.541	3.73292
181.633	1804	3.4	1.608	3.76107
181.678	1805	3.4	1.675	3.7902
181.765	1806	3.4	1.742	3.82028
181.846	1807	3.4	1.809	3.8513
181.926	1808	3.4	1.876	3.88322
182.009	1809	3.4	1.943	3.91602
182.118	1810	3.4	2.01	3.9497
182.202	1811	3.4	2.077	3.98421
182.354	1812	3.4	2.144	4.01954
182.448	1813	3.4	2.211	4.05568
182.535	1814	3.4	2.278	4.09259
182.601	1815	3.4	2.345	4.13026
182.68	1816	3.4	2.412	4.16866
182.757	1817	3.5	2.479	4.28899
182.833	1818	3.5	2.546	4.32806
182.92	1819	3.5	2.613	4.36781
183.051	1820	3.5	2.68	4.40822
183.101	1821	3.5	2.747	4.44927
183.157	1822	3.5	2.814	4.49095
183.208	1823	3.5	2.881	4.53323
183.278	1824	3.5	2.948	4.5761
183.383	1825	3.5	3.015	4.61955
183.444	1826	3.5	3.082	4.66355
183.554	1827	3.5	3.149	4.7081
183.628	1828	3.5	3.216	4.75317
183.713	1829	3.5	3.283	4.79876
183.811	1830	3.5	3.35	4.84484
183.909	1831	3.5	3.417	4.89141
183.991	1832	3.5	3.484	4.93845
184.059	1833	3.5	3.551	4.98594
184.164	1834	3.5	3.618	5.03388
184.24	1835	3.5	3.685	5.08225
184.331	1836	3.5	3.752	5.13103
184.387	1837	3.5	3.819	5.18023
184.506	1838	3.5	3.886	5.22982
184.595	1839	3.5	3.953	5.27979
184.676	1840	3.5	4.02	5.33014
184.727	1841	3.5	4.087	5.38085
184.85	1842	3.5	4.154	5.43192
184.955	1843	3.5	4.221	5.48332
185.06	1844	3.5	4.288	5.53506
185.112	1845	3.5	4.355	5.58713
185.204	1846	3.5	4.422	5.63951
185.267	1847	3.5	4.489	5.6922
185.399	1848	3.5	4.556	5.74518
185.493	1849	3.5	4.623	5.79846
185.598	1850	3.5	4.69	5.85202
185.743	1851	3.5	4.757	5.90585
185.822	1852	3.5	4.824	5.95995
185.907	1853	3.5	4.891	6.01431
186.002	1854	3.5	4.958	6.06892
186.082	1855	3.5	5.025	6.12378
186.152	1856	3.5	5.092	6.17887
186.242	1857	3.5	5.159	6.2342
186.313	1858	3.5	5.226	6.28976
186.393	1859	3.5	5.293	6.34554
186.473	1860	3.5	5.36	6.40153
186.54	1861	3.6	5.427	6.51247
186.603	1862	3.6	5.494	6.56841
186.698	1863	3.6	5.561	6.62455
186.808	1864	3.6	5.628	6.6809
186.883	1865	3.6	5.695	6.73743
186.953	1866	3.6	5.762	6.79416
187.028	1867	3.6	5.829	6.85108
187.108	1868	3.6	5.896	6.90817
187.178	1869	3.6	5.963	6.96544
187.283	1870	3.6	6.03	7.02288
187.393	1871	3.6	6.097	7.08049
187.468	1872	3.6	6.164	7.13827
187.573	1873	3.6	6.231	7.1962
187.658	1874	3.6	6.298	7.2543
187.783	1875	3.6	6.365	7.31254
187.847	1876	3.6	6.432	7.37093
187.887	1877	3.6	6.499	7.42947
187.967	1878	3.6	6.566	7.48815
188.022	1879	3.6	6.633	7.54697
188.108	1880	3.6	6.7	7.60592
188.193	1881	3.6	6.767	7.665
188.248	1882	3.6	6.834	7.72422
188.332	1883	3.6	6.901	7.78356
188.392	1884	3.6	6.968	7.84302
188.432	1885	3.6	7.035	7.90261
188.492	1886	3.6	7.102	7.96231
188.592	1887	3.6	7.169	8.02213
188.682	1888	3.6	7.236	8.08206
188.772	1889	3.6	7.303	8.1421
188.853	1890	3.6	7.37	8.20225
188.927	1891	3.6	7.437	8.2625
188.993	1892	3.6	7.504	8.32286
189.048	1893	3.6	7.571	8.38332
189.158	1894	3.6	7.638	8.44388
189.258	1895	3.6	7.705	8.50453
189.353	1896	3.6	7.772	8.56528
189.493	1897	3.6	7.839	8.62612
189.603	1898	3.6	7.906	8.68705
189.717	1899	3.6	7.973	8.74807
189.806	1900	3.6	8.04	8.80918
189.871	1901	3.6	8.107	8.87037
189.906	1902	3.6	8.174	8.93164
189.966	1903	3.6	8.241	8.993
190.021	1904	3.6	8.308	9.05444
190.147	1905	3.7	8.375	9.15591
190.242	1906	3.7	8.442	9.21723
190.321	1907	3.7	8.509	9.27864
190.421	1908	3.7	8.576	9.34012
190.466	1909	3.7	8.643	9.40167
190.586	1910	3.7	8.71	9.4633
190.691	1911	3.7	8.777	9.52501
190.811	1912	3.7	8.844	9.58678
190.891	1913	3.7	8.911	9.64862
190.957	1914	3.7	8.978	9.71053
191.022	1915	3.7	9.045	9.77251
191.117	1916	3.7	9.112	9.83456
191.203	1917	3.7	9.179	9.89667
191.328	1918	3.7	9.246	9.95884
191.388	1919	3.7	9.313	10.0211
191.468	1920	3.7	9.38	10.0834
191.523	1921	3.7	9.447	10.1457
191.598	1922	3.7	9.514	10.2081
191.648	1923	3.7	9.581	10.2706
191.683	1924	3.7	9.648	10.3331
191.788	1925	3.7	9.715	10.3957
191.879	1926	3.7	9.782	10.4584
191.959	1927	3.7	9.849	10.5211
192.055	1928	3.7	9.916	10.5838
192.105	1929	3.7	9.983	10.6466
192.181	1930	3.7	10.05	10.7095
192.326	1931	3.7	10.117	10.7724
192.431	1932	3.7	10.184	10.8353
192.526	1933	3.7	10.251	10.8983
[truncated: 13,703 more rows]

## Sheet: Volcanic Tie Points
SPICEcoreDepth (m)	WD2014 Age (years BP)
10.58	-14
23.58	67
33.21	135
33.99	141
48.04	256
58.76	355
72.56	491
83.65	606
89.27	664
90.24	674
90.87	681
91.9	692
94.65	720
99.75	779
105.21	841
140.73	1268
148.94	1375
151.6	1410
159.31	1516
176.6	1744
179.55	1780
228.18	2376
275.67	3123
289.61	3311
302.57	3500
306.72	3561
309.55	3605
313.84	3668
325.2	3830
328.3	3874
332.13	3925
336.64	3989
353.11	4223
357.4	4284
358.83	4307
362.09	4354
382.98	4667
395.58	4860
402.65	4966
409.8	5070
411.85	5098
438.18	5468
447.6	5600
448.75	5617
474.5	5977
485.43	6126
488.35	6165
497.1	6283
499.3	6312
500.3	6327
511.66	6481
516.3	6544
516.97	6553
524.24	6654
524.91	6662
557.44	7177
581.41	7572
594.4	7794
598.82	7871
615.41	8178
618.34	8229
623.65	8321
625.98	8363
641.66	8613
663	8942
670.46	9065
687.38	9354
705.67	9682
707.95	9726
711.47	9790
713.8	9837
726.64	10081
728.41	10116
735.1	10237
739.91	10324
741.94	10360
743.51	10388
744.36	10402
746.02	10432
776.28	10957
784.17	11099
786.07	11131
787.61	11159
787.95	11166
788.38	11174
798.07	11343
798.56	11351
799.43	11365
803.43	11439
803.77	11445
836.78	12064
840.33	12137
840.73	12145
850.11	12342
870.61	12848
872.02	12884
873.18	12917
874.45	12949
881.43	13136
890.67	13381
895.25	13510
899.19	13618
902.32	13707
904.55	13772
925.24	14356
933.87	14583
939.54	14734
940.18	14751
941.29	14780
941.68	14793
943.96	14850
945.33	14885
945.99	14903
947.99	14954
951.83	15050
953.45	15093
956.07	15163
957.03	15185
965.42	15418
984.04	15951
984.64	15971
986.15	16019
990.86	16165
992.85	16236
996.42	16355
997.85	16407
1010.9	16872
1071.39	19348
1074.66	19484
1075.76	19535
1085.63	19947
1093.08	20241
1093.59	20258
1094.2	20281
1096.99	20392
1101.84	20586
1109.38	20866
1111.83	20990
1114.08	21087
1118.11	21270
1123.56	21533
1129.78	21837
1134.6	22082
1141.25	22441
1142.46	22503
1147.33	22767
1161.05	23497
1161.87	23545
1166.1	23775
1168.49	23913
1169.85	23986
1178.8	24552
1182.52	24792
1188.48	25159
1189.01	25193
1191.19	25317
1196.1	25622
1201.56	25966
1202.1	25997
1204.74	26166
1205.61	26219
1206.91	26295
1219.21	27083
1230.65	27790
1232.82	27916
1237.81	28217
1239.88	28337
1241.27	28420
1242.25	28485
1244.72	28634
1250.79	28979
1264.45	29673
1274.81	30207
1279.48	30461
1301.06	31579
1306.16	31929
1309.97	32209
1314.31	32506
1314.93	32548
1317.64	32724
1318.85	32794
1328.06	33282
1328.71	33314
1329.05	33328
1330.09	33380
1330.23	33388
1349.23	34383
1352.58	34565
1356.49	34764
1357.86	34832
1359.81	34924
1360.17	34942
1362.07	35029
1368.63	35313
1377.87	35709
1382.12	35883
1383.29	35931
1385.35	36015
1385.95	36044
1386.48	36063
1389.94	36205
1394.66	36400
1403.67	36768
1407.45	36931
1413.69	37196
1417.68	37370
1418.01	37385
1419.69	37459
1420.92	37512
1432.87	38051
1435.65	38174
1436.11	38194
1436.92	38230
1439.28	38333
1453.59	38936
1470.33	39589
1471.14	39624
1479.4	39966
1480.59	40022
1485.58	40253
1489.06	40426
1508.88	41295
1512.17	41421
1514.56	41512
1528.74	42057
1532.18	42200
1534.07	42280
1543.36	42697
1545.51	42797
1549.24	42973
1551.39	43074
1555.25	43259
1560.13	43498
1560.68	43525
1586.63	44888
1590.81	45146
1598.79	45624
1606.42	46060
1608.6	46179
1619.89	46792
1627.26	47173
1637.12	47658
1637.44	47675
1664.78	49171
1681.98	50229
1698.38	51077
1701.02	51227
1714.36	51971
1716.25	52064
1719.07	52215
1750.61	54283

## Sheet: Holocene Accumulation-Nitrate
Depth (m)	Age (Years Before 1950)	Layer Thickness (m)	Water Equivalent Annual Layer Thickness (m)	Accumulation Rate (m w.e./yr)	Nitrate Concentration (ppb)
0	-65
0.196	-64	0.196	0.0709149	0.070857	58.0963
0.461	-63	0.265	0.0965263	0.0964505	66.1519
0.674	-62	0.213	0.0780012	0.0779425	87.5463
0.84	-61	0.166	0.0610416	0.0609976	80.3692
1.053	-60	0.213	0.0787378	0.0786836	88.1645
1.28	-59	0.227	0.0843809	0.0843255	75.102
1.508	-58	0.228	0.0852229	0.0851696	83.6207
1.782	-57	0.274	0.103093	0.103032	109.421
1.901	-56	0.119	0.0449013	0.0448761	130.677
2.161	-55	0.26	0.0987087	0.0986566	109.594
2.346	-54	0.185	0.0705403	0.0705053	95.7146
2.545	-53	0.199	0.0762306	0.0761952	107.578
2.782	-52	0.237	0.0912849	0.0912454	76.0221
3.014	-51	0.232	0.0898341	0.0897981	75.6639
3.246	-50	0.232	0.0903073	0.090274	144.06
3.44	-49	0.194	0.0758454	0.0758198	142.096
3.686	-48	0.246	0.0967034	0.0966739	100.428
3.881	-47	0.195	0.0769859	0.0769649	124.234
4.094	-46	0.213	0.0844856	0.0844653	99.6526
4.316	-45	0.222	0.0884812	0.0884628	119.631
4.669	-44	0.353	0.141765	0.14174	131.015
5.034	-43	0.365	0.147723	0.147701	70.9896
5.165	-42	0.131	0.0531644	0.0531584	135.065
5.325	-41	0.16	0.065151	0.0651458	145.606
5.465	-40	0.14	0.0571732	0.0571705	141.96
5.745	-39	0.28	0.115008	0.115007	158.252
5.865	-38	0.12	0.0494105	0.0494113	154.61
6.025	-37	0.16	0.0660956	0.0660988	121.075
6.195	-36	0.17	0.0704686	0.0704743	148.957
6.385	-35	0.19	0.0790605	0.0790693	125.052
6.654	-34	0.269	0.112535	0.112551	121.961
6.874	-33	0.22	0.092437	0.0924533	108.65
7.059	-32	0.185	0.0780137	0.07803	110.028
7.209	-31	0.15	0.0634397	0.0634549	113.464
7.459	-30	0.25	0.106246	0.106275	105.142
7.665	-29	0.206	0.0878936	0.0879204	98.741
7.894	-28	0.229	0.0981343	0.0981673	122.83
8.054	-27	0.16	0.0687734	0.0687987	131.469
8.219	-26	0.165	0.0711431	0.0711716	118.146
8.324	-25	0.105	0.045362	0.0453816	112.19
8.539	-24	0.215	0.0932568	0.0933001	121.646
8.716	-23	0.177	0.077026	0.0770643	123.574
8.868	-22	0.152	0.0663318	0.0663669	149.977
9.063	-21	0.195	0.0854006	0.0854485	168.89
9.253	-20	0.19	0.0834985	0.083548	156.873
9.493	-19	0.24	0.105929	0.105995	131.337
9.653	-18	0.16	0.070822	0.0708685	134.44
9.813	-17	0.16	0.071024	0.071073	126.912
10.008	-16	0.195	0.0868598	0.0869224	136.746
10.218	-15	0.21	0.0938872	0.0939579	129.848
10.363	-14	0.145	0.0649913	0.0650423	115.592
10.693	-13	0.33	0.14876	0.148881	99.5328
10.888	-12	0.195	0.0881984	0.0882733	118.858
11.063	-11	0.175	0.0793893	0.0794593	117.17
11.213	-10	0.15	0.0682215	0.0682838	107.343
11.513	-9	0.3	0.137135	0.137264	99.3391
11.713	-8	0.2	0.0917292	0.0918189	95.1893
11.868	-7	0.155	0.0712735	0.0713455	87.4098
12.098	-6	0.23	0.106163	0.106274	84.8705
12.301	-5	0.203	0.0940129	0.0941139	78.7668
12.513	-4	0.212	0.0985205	0.0986295	82.6567
12.728	-3	0.215	0.100263	0.100377	87.9172
12.888	-2	0.16	0.0748062	0.0748938	81.6354
13.068	-1	0.18	0.0843995	0.084501	79.8509
13.183	0	0.115	0.0540207	0.0540874	75.364
13.393	1	0.21	0.0989748	0.0991002	80.0929
13.593	2	0.2	0.0945586	0.0946814	93.8016
13.808	3	0.215	0.101992	0.102128	88.4328
14.018	4	0.21	0.0999456	0.100082	77.2836
14.198	5	0.18	0.0859057	0.0860256	86.9127
14.368	6	0.17	0.0813449	0.081461	93.0675
14.514	7	0.146	0.0700167	0.0701189	75.3433
14.668	8	0.154	0.0740261	0.0741365	89.6819
14.859	9	0.191	0.0920769	0.0922171	83.4215
15.019	10	0.16	0.077318	0.0774383	83.0769
15.224	11	0.205	0.0993674	0.0995251	88.1126
15.409	12	0.185	0.0899196	0.0900652	79.4162
15.57	13	0.161	0.0784406	0.0785701	76.2997
15.7	14	0.13	0.0634582	0.0635651	87.9079
15.845	15	0.145	0.0709306	0.0710524	93.0242
16	16	0.155	0.0759938	0.0761266	88.4129
16.1	17	0.1	0.0490994	0.0491868	81.6857
16.365	18	0.265	0.130612	0.130849	84.168
16.526	19	0.161	0.0795362	0.0796829	89.6263
16.633	20	0.107	0.0529403	0.0530396	81.3282
16.756	21	0.123	0.0609631	0.0610795	80.8222
16.921	22	0.165	0.0819711	0.0821302	75.518
17.046	23	0.125	0.0622089	0.0623316	87.5135
17.176	24	0.13	0.0648154	0.0649454	82.5225
17.332	25	0.156	0.0779484	0.0781071	83.8023
17.572	26	0.24	0.120321	0.12057	93.292
17.692	27	0.12	0.0602605	0.0603871	92.9902
17.897	28	0.205	0.103236	0.103456	71.8343
18.038	29	0.141	0.0711432	0.0712973	77.7926
18.148	30	0.11	0.0555851	0.0557073	81.181
18.288	31	0.14	0.0708793	0.0710374	82.9765
18.438	32	0.15	0.0760964	0.0762685	89.6573
18.578	33	0.14	0.0711573	0.0713205	74.6364
18.759	34	0.181	0.0922197	0.0924341	83.1521
18.869	35	0.11	0.0561274	0.0562598	82.6977
18.98	36	0.111	0.0567213	0.0568569	81.7108
19.074	37	0.094	0.0480942	0.0482107	85.3065
19.214	38	0.14	0.0717623	0.0719384	90.7445
19.375	39	0.161	0.0827016	0.0829072	92.1179
19.49	40	0.115	0.0591617	0.0593107	83.7707
19.64	41	0.15	0.0773186	0.0775158	84.8048
19.754	42	0.114	0.0588493	0.0590013	82.0993
19.875	43	0.121	0.0625608	0.0627244	95.1048
20.005	44	0.13	0.067327	0.0675052	87.1138
20.166	45	0.161	0.0835546	0.0837785	82.5164
20.296	46	0.13	0.0675788	0.067762	83.6429
20.436	47	0.14	0.0729072	0.0731072	78.1109
20.606	48	0.17	0.0887214	0.0889676	80.6311
20.691	49	0.085	0.0444084	0.0445331	78.2069
20.891	50	0.2	0.104754	0.105051	73.5895
21.092	51	0.201	0.105543	0.105846	82.3079
21.312	52	0.22	0.115836	0.116173	96.9866
21.442	53	0.13	0.0685589	0.0687603	98.1173
21.582	54	0.14	0.0739603	0.0741799	105.082
21.757	55	0.175	0.0926492	0.0929272	97.4659
21.892	56	0.135	0.0715903	0.0718074	87.5767
22.002	57	0.11	0.0584111	0.0585901	85.0912
22.127	58	0.125	0.066477	0.0666829	76.564
22.348	59	0.221	0.117846	0.118214	79.7063
22.543	60	0.195	0.104225	0.104555	88.7443
22.683	61	0.14	0.0749536	0.075193	84.754
22.843	62	0.16	0.0858246	0.0861014	83.4096
22.948	63	0.105	0.0563926	0.0565763	76.9096
23.088	64	0.14	0.0753146	0.0755623	74.2284
23.173	65	0.085	0.0457725	0.0459246	78.9254
23.363	66	0.19	0.102543	0.102887	78.4999
23.558	67	0.195	0.105482	0.105839	101.068
23.763	68	0.205	0.111155	0.111535	103.757
23.923	69	0.16	0.0869157	0.0872156	102.836
24.074	70	0.151	0.0821692	0.0824553	94.8809
24.199	71	0.125	0.0681183	0.0683577	99.2033
24.364	72	0.165	0.0900855	0.0904051	89.4341
24.46	73	0.096	0.0524706	0.0526584	89.9173
24.61	74	0.15	0.0821247	0.0824213	83.6656
24.731	75	0.121	0.0663378	0.0665795	91.4651
24.876	76	0.145	0.0796254	0.0799181	91.2266
25.148	77	0.272	0.149821	0.150377	84.0574
25.259	78	0.111	0.0612158	0.0614447	88.1975
25.374	79	0.115	0.0635026	0.0637422	88.4116
25.574	80	0.2	0.110683	0.111105	99.486
25.761	81	0.187	0.103702	0.1041	104.561
25.906	82	0.145	0.080538	0.0808495	87.6262
26.051	83	0.145	0.0806652	0.0809799	81.9
26.172	84	0.121	0.0674021	0.0676672	81.3968
26.278	85	0.106	0.0591142	0.0593486	73.4095
26.449	86	0.171	0.0955393	0.0959212	73.7487
26.665	87	0.216	0.120961	0.121448	84.6839
26.866	88	0.201	0.112802	0.11326	96.1274
26.997	89	0.131	0.0736201	0.0739215	94.9721
27.122	90	0.125	0.0703411	0.0706313	89.4725
27.228	91	0.106	0.0597159	0.0599643	86.8393
27.364	92	0.136	0.0767262	0.0770477	83.9796
27.55	93	0.186	0.105139	0.105583	84.5256
27.806	94	0.256	0.145093	0.14571	88.0193
27.997	95	0.191	0.108467	0.108932	87.0613
28.163	96	0.166	0.0944307	0.0948386	76.1207
28.314	97	0.151	0.0860308	0.0864051	79.7344
28.459	98	0.145	0.0827347	0.0830973	89.6068
28.564	99	0.105	0.0599753	0.0602401	88.7528
28.785	100	0.221	0.126517	0.127079	99.7598
28.92	101	0.135	0.0773891	0.0777358	93.4804
29.056	102	0.136	0.0780689	0.0784212	92.7087
29.211	103	0.155	0.0891137	0.0895187	94.3307
29.327	104	0.116	0.0667687	0.0670743	93.6374
29.477	105	0.15	0.0864676	0.0868661	95.053
29.598	106	0.121	0.0698341	0.0701582	97.2232
29.843	107	0.245	0.141741	0.142404	113.163
29.948	108	0.105	0.0608089	0.061095	121.401
30.053	109	0.105	0.0608713	0.0611597	101.37
30.208	110	0.155	0.0899935	0.0904228	87.578
30.303	111	0.095	0.0552083	0.0554734	92.4475
30.403	112	0.1	0.0581703	0.0584515	89.9508
30.538	113	0.135	0.0786324	0.079015	96.8315
30.658	114	0.12	0.0699762	0.070319	81.681
30.762	115	0.104	0.0607067	0.061006	91.6478
30.872	116	0.11	0.0642766	0.0645956	76.9878
30.978	117	0.106	0.062002	0.0623117	77.7723
31.098	118	0.12	0.0702712	0.0706244	87.6807
31.203	119	0.105	0.0615486	0.06186	91.9824
31.402	120	0.199	0.116869	0.117464	94.1197
31.496	121	0.094	0.0552533	0.0555364	104.383
31.601	122	0.105	0.06178	0.0620986	97.4103
31.701	123	0.1	0.0588933	0.0591988	76.541
31.815	124	0.114	0.0672099	0.0675608	71.5672
31.96	125	0.145	0.0856018	0.0860514	78.8849
32.074	126	0.114	0.067372	0.067728	74.8559
32.204	127	0.13	0.0769201	0.0773291	72.0432
32.313	128	0.109	0.0645595	0.0649048	73.743
32.423	129	0.11	0.0652177	0.0655687	75.1931
32.518	130	0.095	0.0563735	0.0566787	77.9266
32.658	131	0.14	0.0831832	0.0836362	71.9276
32.753	132	0.095	0.0564947	0.0568042	82.3012
32.863	133	0.11	0.0654804	0.0658412	84.2627
32.963	134	0.1	0.0595816	0.0599119	73.6924
33.113	135	0.15	0.0894938	0.0899927	65.5382
33.228	136	0.115	0.068683	0.0690682	89.3578
33.351	137	0.123	0.0735422	0.073957	85.2148
33.427	138	0.076	0.0454717	0.0457296	76.6941
33.636	139	0.209	0.125281	0.125995	84.1622
33.763	140	0.127	0.0762136	0.0766508	98.2042
33.937	141	0.174	0.10458	0.105183	70.3416
34.029	142	0.092	0.05534	0.055661	75.6861
34.184	143	0.155	0.0933631	0.0939077	78.7494
34.279	144	0.095	0.0572703	0.0576062	83.2585
34.419	145	0.14	0.0845017	0.0850001	81.5291
34.543	146	0.124	0.0749254	0.0753696	72.6415
34.728	147	0.185	0.111964	0.112631	70.6916
34.858	148	0.13	0.0787657	0.0792378	66.9111
34.988	149	0.13	0.078854	0.0793292	70.6357
35.098	150	0.11	0.0667858	0.0671904	72.8066
35.217	151	0.119	0.0723238	0.0727643	69.3583
35.313	152	0.096	0.0583932	0.0587507	69.9219
35.403	153	0.09	0.0547856	0.0551229	68.2422
35.463	154	0.06	0.0365424	0.0367685	68.3211
35.613	155	0.15	0.0914725	0.0920415	67.2115
35.752	156	0.139	0.0848643	0.0853949	70.7714
35.957	157	0.205	0.125376	0.126164	80.8129
36.052	158	0.095	0.0581474	0.0585147	86.3556
36.133	159	0.081	0.049612	0.049927	82.3045
36.268	160	0.135	0.08278	0.0833082	74.7474
36.431	161	0.163	0.100085	0.100727	83.2553
36.527	162	0.096	0.0589926	0.0593729	81.419
36.646	163	0.119	0.0731984	0.0736725	86.9325
36.772	164	0.126	0.0775848	0.0780898	85.0656
36.911	165	0.139	0.0856874	0.086248	86.6042
37.091	166	0.18	0.111126	0.111856	83.7471
37.292	167	0.201	0.124294	0.125115	85.5189
37.495	168	0.203	0.125738	0.126573	88.7904
37.779	169	0.284	0.176312	0.177489	90.6641
37.889	170	0.11	0.0683503	0.0688085	81.4357
38.013	171	0.124	0.077126	0.0776455	84.412
38.118	172	0.105	0.065363	0.0658054	80.8089
38.242	173	0.124	0.0772669	0.0777923	77.7855
38.332	174	0.09	0.0561209	0.0565043	83.3302
38.438	175	0.106	0.0661534	0.0666075	84.5148
38.618	176	0.18	0.112496	0.113272	81.0548
38.733	177	0.115	0.0719373	0.0724358	82.3161
38.931	178	0.198	0.12405	0.124913	85.0706
39.051	179	0.12	0.075252	0.0757783	74.4809
39.191	180	0.14	0.0878896	0.0885071	72.4692
39.326	181	0.135	0.0848395	0.0854383	70.5415
39.42	182	0.094	0.0591164	0.0595355	75.3314
39.565	183	0.145	0.0912922	0.0919424	74.5119
39.72	184	0.155	0.0977044	0.0984035	75.4806
39.824	185	0.104	0.0656088	0.0660803	67.5389
39.893	186	0.069	0.0435519	0.0438663	72.0377
40.043	187	0.15	0.0947863	0.0954737	65.4695
40.108	188	0.065	0.0410944	0.0413937	58.7935
40.293	189	0.185	0.117125	0.117982	64.9458
40.412	190	0.119	0.0754076	0.0759618	62.7478
40.507	191	0.095	0.0602425	0.0606871	63.7991
40.642	192	0.135	0.0856946	0.0863299	62.1798
40.751	193	0.109	0.069247	0.0697625	67.6733
40.901	194	0.15	0.0954008	0.0961142	73.5026
41.026	195	0.125	0.0795747	0.0801723	78.0408
41.151	196	0.125	0.0796485	0.0802493	78.2809
41.275	197	0.124	0.0790839	0.0796829	76.4989
41.395	198	0.12	0.0766006	0.0771833	69.5787
41.48	199	0.085	0.0542927	0.0547075	70.3667
41.594	200	0.114	0.0728771	0.0734362	72.9367
41.709	201	0.115	0.0735783	0.0741451	77.3767
41.874	202	0.165	0.105696	0.106514	75.8312
41.959	203	0.085	0.0544832	0.0549064	68.3189
42.103	204	0.144	0.0923974	0.0931182	65.2707
42.218	205	0.115	0.073851	0.0744295	68.9711
42.287	206	0.069	0.0443327	0.0446814	64.2112
42.412	207	0.125	0.0803852	0.0810201	69.8789
42.496	208	0.084	0.0540515	0.0544801	70.3681
42.591	209	0.095	0.0611713	0.0616584	68.7632
42.786	210	0.195	0.125737	0.126742	72.4791
42.89	211	0.104	0.0671096	0.0676482	74.582
43.01	212	0.12	0.0775001	0.0781247	70.636
43.065	213	0.055	0.0355347	0.0358223	68.8111
43.194	214	0.129	0.0834212	0.0840989	72.4278
43.314	215	0.12	0.0776668	0.0783003	78.9332
43.394	216	0.08	0.051807	0.0522313	75.1066
43.459	217	0.065	0.0421124	0.0424586	74.0981
43.554	218	0.095	0.06159	0.0620983	70.6538
43.699	219	0.145	0.0941011	0.0948807	70.3326
43.804	220	0.105	0.068192	0.0687592	71.7579
43.908	221	0.104	0.0675915	0.0681558	70.9126
44.023	222	0.115	0.0748002	0.0754272	70.7972
44.153	223	0.13	0.0846328	0.085345	69.4161
44.292	224	0.139	0.0905788	0.0913439	69.7794
44.407	225	0.115	0.0749985	0.0756345	67.5143
44.497	226	0.09	0.0587307	0.0592306	68.695
44.567	227	0.07	0.0457014	0.0460918	73.2076
44.701	228	0.134	0.0875656	0.0883165	72.8025
44.801	229	0.1	0.065392	0.0659549	71.5236
44.886	230	0.085	0.0556153	0.0560958	71.3082
44.991	231	0.105	0.0687502	0.0693464	66.0764
45.141	232	0.15	0.0983142	0.0991701	66.1008
45.266	233	0.125	0.0819975	0.082714	69.8716
45.396	234	0.13	0.085352	0.0861005	66.7656
45.536	235	0.14	0.0920038	0.0928136	69.9399
45.636	236	0.1	0.0657609	0.0663419	63.6848
45.78	237	0.144	0.0947866	0.095627	61.4063
45.92	238	0.14	0.0922393	0.0930602	63.0428
46.009	239	0.089	0.0586724	0.0591965	66.261
46.149	240	0.14	0.0923791	0.0932072	68.1028
46.269	241	0.12	0.0792447	0.0799576	66.2629
46.354	242	0.085	0.056163	0.0566701	67.0634
46.474	243	0.12	0.0793513	0.0800703	72.2612
46.614	244	0.14	0.0926613	0.0935039	72.2248
46.769	245	0.155	0.102693	0.10363	76.4816
46.849	246	0.08	0.0530303	0.053516	68.0182
46.969	247	0.12	0.0796074	0.080339	69.8173
47.094	248	0.125	0.0829914	0.0837568	70.8786
47.209	249	0.115	0.0764087	0.0771159	75.764
47.349	250	0.14	0.093103	0.0939677	74.1856
47.439	251	0.09	0.0598865	0.0604446	79.6111
47.554	252	0.115	0.0765779	0.0772941	80.2448
47.689	253	0.135	0.0899732	0.0908176	80.8077
47.804	254	0.115	0.0766999	0.0774222	72.9683
47.904	255	0.1	0.0667379	0.0673685	75.125
48.039	256	0.135	0.0901731	0.0910281	79.5879
48.169	257	0.13	0.0869046	0.0877314	81.1396
48.244	258	0.075	0.050161	0.0506398	71.9711
48.37	259	0.126	0.0843371	0.0851449	77.5726
48.465	260	0.095	0.0636253	0.0642368	68.378
48.661	261	0.196	0.13143	0.132697	67.4975
48.731	262	0.07	0.0469597	0.047414	66.2114
48.847	263	0.116	0.077875	0.078631	65.6366
48.953	264	0.106	0.0712083	0.0719019	71.1365
49.028	265	0.075	0.0504066	0.0508992	74.8351
49.104	266	0.076	0.0511027	0.0516037	76.6504
49.184	267	0.08	0.0538188	0.0543483	74.5878
49.28	268	0.096	0.0646207	0.0652585	69.2882
49.401	269	0.121	0.0815095	0.0823166	73.4767
49.476	270	0.075	0.0505456	0.0510478	71.1554
49.552	271	0.076	0.0512433	0.0517541	65.2732
49.668	272	0.116	0.0782688	0.0790515	66.9681
49.804	273	0.136	0.0918394	0.0927607	61.6817
49.94	274	0.136	0.0919151	0.0928401	68.7666
50.076	275	0.136	0.0919907	0.0929194	66.0804
50.126	276	0.05	0.0338303	0.034173	59.7374
50.222	277	0.096	0.0649917	0.0656521	56.4701
50.353	278	0.131	0.0887564	0.0896611	62.0255
50.474	279	0.121	0.0820405	0.0828795	64.3688
50.56	280	0.086	0.0583398	0.0589382	63.7927
50.645	281	0.085	0.0576906	0.0582843	61.0193
50.736	282	0.091	0.0617964	0.0624343	56.3432
50.898	283	0.162	0.110117	0.111257	59.5236
50.983	284	0.085	0.0578065	0.0584069	59.0809
51.074	285	0.091	0.0619202	0.0625654	61.3851
51.176	286	0.102	0.0694468	0.0701727	63.6789
51.261	287	0.085	0.0579013	0.0585083	72.6371
51.402	288	0.141	0.0961275	0.0971385	68.4395
51.513	289	0.111	0.075724	0.0765228	62.8056
51.67	290	0.157	0.107203	0.108338	66.0232
51.74	291	0.07	0.0478171	0.0483246	63.9722
51.851	292	0.111	0.0758731	0.0766809	55.0168
52.037	293	0.186	0.127276	0.128635	53.3322
52.143	294	0.106	0.0725778	0.0733552	51.6935
52.249	295	0.106	0.0726221	0.0734023	55.2728
52.415	296	0.166	0.113837	0.115064	65.9233
52.525	297	0.11	0.0754819	0.0762977	72.0343
52.651	298	0.126	0.0865232	0.0874612	68.2318
52.761	299	0.11	0.0755835	0.0764053	63.3
52.832	300	0.071	0.0488054	0.0493376	58.1907
52.927	301	0.095	0.0653381	0.0660528	54.2542
53.057	302	0.13	0.0894758	0.0904574	55.0922
53.187	303	0.13	0.0895414	0.0905267	58.715
53.303	304	0.116	0.0799507	0.0808329	60.9391
53.443	305	0.14	0.096568	0.0976368	63.0089
53.518	306	0.075	0.0517545	0.052329	69.7775
53.604	307	0.086	0.0593737	0.0600347	60.8211
53.692	308	0.088	0.0607843	0.061463	58.9246
53.789	309	0.097	0.0670371	0.0677877	62.9706
53.925	310	0.136	0.0940611	0.0951174	73.3203
54.005	311	0.08	0.0553545	0.055978	73.0436
54.221	312	0.216	0.149636	0.151326	59.7737
54.281	313	0.06	0.0415791	0.0420501	66.6026
54.361	314	0.08	0.0554632	0.0560933	71.3641
54.511	315	0.15	0.104079	0.105265	65.9384
54.626	316	0.115	0.0798441	0.0807562	74.9468
54.766	317	0.14	0.0972757	0.0983901	76.6057
54.911	318	0.145	0.100829	0.101988	73.17
55.036	319	0.125	0.0869806	0.0879827	80.4794
55.177	320	0.141	0.0981888	0.0993233	93.0654
55.267	321	0.09	0.0627041	0.0634306	90.7024
55.377	322	0.11	0.0766836	0.0775746	81.4166
55.477	323	0.1	0.0697498	0.0705625	77.0135
55.632	324	0.155	0.108202	0.109466	81.1527
55.718	325	0.086	0.0600621	0.0607658	77.6103
55.813	326	0.095	0.0663812	0.0671611	74.0248
55.882	327	0.069	0.0482314	0.0487996	69.1067
55.992	328	0.11	0.0769355	0.0778444	67.3973
56.077	329	0.085	0.0594769	0.0601815	73.2282
56.137	330	0.06	0.041997	0.0424959	73.5283
56.257	331	0.12	0.0840472	0.0850483	77.0815
56.383	332	0.126	0.0883081	0.0893627	81.6515
56.488	333	0.105	0.0736306	0.0745124	78.5127
56.548	334	0.06	0.0420879	0.0425932	76.7821
56.663	335	0.115	0.0807169	0.0816888	75.8875
56.728	336	0.065	0.0456381	0.046189	79.8368
56.818	337	0.09	0.0632208	0.0639861	77.7604
56.888	338	0.07	0.0491896	0.0497867	78.2699
57.028	339	0.14	0.0984508	0.0996489	80.5231
57.108	340	0.08	0.0562809	0.0569676	81.4716
57.228	341	0.12	0.0844736	0.0855072	80.4521
57.378	342	0.15	0.105674	0.10697	83.03
57.443	343	0.065	0.0458072	0.0463706	87.1685
57.513	344	0.07	0.0493485	0.0499571	82.1587
57.608	345	0.095	0.0670056	0.0678341	82.3783
57.722	346	0.114	0.0804536	0.081451	84.6551
57.798	347	0.076	0.0536565	0.0543234	78.4192
57.89	348	0.092	0.064983	0.0657929	76.8015
57.993	349	0.103	0.0727908	0.0737003	85.1569
58.118	350	0.125	0.0883943	0.0895016	94.117
58.184	351	0.066	0.0466878	0.0472742	95.0041
58.254	352	0.07	0.0495349	0.0501586	87.4097
58.354	353	0.1	0.0707998	0.0716935	93.521
58.473	354	0.119	0.0843021	0.0853691	90.3711
58.638	355	0.165	0.116986	0.118471	88.2959
58.773	356	0.135	0.0957806	0.0969991	103.738
58.879	357	0.106	0.0752452	0.0762049	110.378
58.994	358	0.115	0.0816807	0.0827251	94.7344
59.069	359	0.075	0.0532898	0.053973	88.0819
59.174	360	0.105	0.0746446	0.0756039	92.0819
59.298	361	0.124	0.0882057	0.0893421	89.5516
59.388	362	0.09	0.0640487	0.064876	82.6348
59.474	363	0.086	0.061228	0.0620208	85.9619
59.583	364	0.109	0.0776445	0.0786524	80.9509
59.659	365	0.076	0.0541576	0.0548624	72.8211
59.784	366	0.125	0.0891294	0.0902922	63.5851
59.899	367	0.115	0.0820451	0.0831181	66.3711
59.979	368	0.08	0.0570971	0.0578457	69.5812
60.059	369	0.08	0.0571193	0.05787	66.7727
60.129	370	0.07	0.0499963	0.0506551	69.0855
60.244	371	0.115	0.0821826	0.0832681	72.7935
60.329	372	0.085	0.0607686	0.0615732	75.2457
60.449	373	0.12	0.0858406	0.08698	70.4749
60.574	374	0.125	0.0894711	0.0906615	70.252
60.689	375	0.115	0.0823588	0.0834573	65.0567
60.813	376	0.124	0.088857	0.090045	66.8349
60.908	377	0.095	0.0681068	0.0690196	60.8086
60.978	378	0.07	0.0502007	0.0508752	60.439
61.068	379	0.09	0.0645714	0.065441	75.6897
61.188	380	0.12	0.0861442	0.0873072	73.3732
61.283	381	0.095	0.0682282	0.0691515	73.5622
61.358	382	0.075	0.0538835	0.0546144	68.3831
61.438	383	0.08	0.0574974	0.0582792	71.5589
61.573	384	0.135	0.0970886	0.0984119	75.2878
61.703	385	0.13	0.0935498	0.0948279	77.8574
61.828	386	0.125	0.0900044	0.091237	72.3941
61.903	387	0.075	0.0540216	0.0547632	72.4327
61.998	388	0.095	0.0684576	0.0693996	71.1214
62.107	389	0.109	0.078586	0.0796699	69.9577
62.197	390	0.09	0.0649146	0.0658121	72.0953
62.297	391	0.1	0.0721608	0.0731608	80.0625
62.427	392	0.13	0.0938655	0.0951693	85.1833
62.522	393	0.095	0.0686241	0.0695795	85.6066
62.622	394	0.1	0.0722692	0.0732777	83.0403
62.742	395	0.12	0.0867708	0.0879845	78.2852
62.857	396	0.115	0.0831992	0.0843657	73.9113
63.012	397	0.155	0.112217	0.113794	75.5405
63.097	398	0.085	0.0615625	0.0624296	77.2623
63.162	399	0.065	0.0470911	0.0477559	81.952
63.312	400	0.15	0.108746	0.110285	75.3895
63.422	401	0.11	0.0797867	0.0809183	82.0735
63.487	402	0.065	0.0471605	0.0478309	77.0283
63.571	403	0.084	0.060969	0.0618377	76.1333
63.661	404	0.09	0.0653504	0.0662837	70.4361
63.756	405	0.095	0.0690105	0.0699982	69.9496
63.896	406	0.14	0.101764	0.103223	65.957
63.986	407	0.09	0.0654458	0.0663868	72.3702
64.105	408	0.119	0.0865799	0.0878275	71.9251
64.225	409	0.12	0.0873541	0.0886157	74.6178
64.335	410	0.11	0.0801137	0.0812734	92.5335
64.445	411	0.11	0.0801528	0.0813157	83.1639
64.54	412	0.095	0.069252	0.0702589	74.2913
64.65	413	0.11	0.0802254	0.0813946	73.9926
64.78	414	0.13	0.0948662	0.0962517	73.0149
64.89	415	0.11	0.0803102	0.0814857	73.7686
64.985	416	0.095	0.0693877	0.0704056	74.0512
65.095	417	0.11	0.0803823	0.0815641	68.1413
65.17	418	0.075	0.054824	0.0556319	71.0778
65.229	419	0.059	0.0431393	0.0437764	68.3538
65.344	420	0.115	0.0841273	0.0853724	68.6755
65.474	421	0.13	0.095154	0.0965655	78.8176
65.584	422	0.11	0.0805533	0.0817508	87.635
65.659	423	0.075	0.0549405	0.055759	83.2974
65.749	424	0.09	0.0659542	0.066939	81.9695
65.834	425	0.085	0.0623129	0.0632453	86.4198
65.949	426	0.115	0.0843474	0.0856122	82.1817
66.043	427	0.094	0.0689726	0.0700091	88.5217
66.133	428	0.09	0.066063	0.067058	84.8217
66.228	429	0.095	0.0697615	0.0708144	91.6926
66.363	430	0.135	0.0991918	0.100692	94.0788
66.468	431	0.105	0.0771836	0.0783536	93.5918
66.528	432	0.06	0.0441162	0.0447863	95.3869
66.603	433	0.075	0.0551627	0.0560025	87.2648
66.708	434	0.105	0.0772622	0.0784408	83.8351
66.802	435	0.094	0.0691955	0.0702534	82.8567
66.897	436	0.095	0.0699596	0.0710314	84.118
67.012	437	0.115	0.0847289	0.0860298	76.3634
67.102	438	0.09	0.0663346	0.0673552	74.5445
67.197	439	0.095	0.0700477	0.0711277	79.0537
67.292	440	0.095	0.0700755	0.0711583	79.8105
67.452	441	0.16	0.118101	0.119929	81.6532
67.542	442	0.09	0.0664565	0.0674876	80.2969
67.697	443	0.155	0.114526	0.116307	78.6188
67.782	444	0.085	0.0628269	0.0638058	84.5209
67.876	445	0.094	0.0695062	0.0705914	78.3877
67.975	446	0.099	0.0732332	0.074379	82.9879
68.05	447	0.075	0.0554968	0.0563669	70.7296
68.161	448	0.111	0.0821727	0.0834637	73.6809
68.251	449	0.09	0.0666511	0.0677004	85.5981
68.316	450	0.065	0.0481497	0.0489093	86.2993
68.391	451	0.075	0.0555744	0.0564529	81.9052
68.501	452	0.11	0.0815456	0.0828375	75.1605
68.601	453	0.1	0.0741626	0.0753398	72.2132
68.661	454	0.06	0.0445084	0.0452164	69.8069
68.766	455	0.105	0.0779229	0.0791649	71.5643
68.895	456	0.129	0.0957838	0.0973136	72.0771
68.996	457	0.101	0.0750241	0.0762248	67.8981
69.111	458	0.115	0.085463	0.0868336	73.1307
69.216	459	0.105	0.0780644	0.0793188	69.9817
69.295	460	0.079	0.0587528	0.0596988	68.0165
69.37	461	0.075	0.0557947	0.0566949	70.7371
69.47	462	0.1	0.0744227	0.0756259	65.4763
69.56	463	0.09	0.0670045	0.0680899	65.2688
69.685	464	0.125	0.0931081	0.0946194	70.9085
69.805	465	0.12	0.0894264	0.0908809	71.892
69.885	466	0.08	0.0596365	0.0606084	63.8947
70	467	0.115	0.0857664	0.087167	68.4677
70.095	468	0.095	0.0708771	0.0720368	68.4157
70.22	469	0.125	0.0933053	0.094835	73.3274
70.335	470	0.115	0.0858796	0.0872904	77.2819
70.41	471	0.075	0.0560249	0.0569471	76.2966
70.505	472	0.095	0.0709913	0.0721622	73.6408
70.62	473	0.115	0.0859755	0.0873962	73.8695
70.706	474	0.086	0.0643162	0.0653812	70.3579
70.862	475	0.156	0.116737	0.118674	81.5494
70.948	476	0.086	0.0643767	0.0654469	84.6513
71.099	477	0.151	0.1131	0.114983	78.6435
71.185	478	0.086	0.0644358	0.0655111	69.8202
71.324	479	0.139	0.104202	0.105944	77.0612
71.463	480	0.139	0.104258	0.106004	80.4386
71.584	481	0.121	0.0907987	0.0923228	72.9016
71.664	482	0.08	0.0600505	0.0610605	82.4186
71.735	483	0.071	0.0533093	0.0542076	82.5017
71.863	484	0.128	0.0961538	0.0977772	84.3052
71.942	485	0.079	0.0593627	0.0603669	73.6418
72.015	486	0.073	0.0548694	0.0557994	78.0752
72.093	487	0.078	0.0586449	0.0596408	80.6387
72.145	488	0.052	0.0391043	0.0397696	83.3919
72.26	489	0.115	0.0865182	0.0879931	87.733
72.35	490	0.09	0.0677329	0.0688897	69.8653
72.48	491	0.13	0.0978843	0.0995593	63.8638
72.575	492	0.095	0.0715563	0.0727831	74.0084
72.705	493	0.13	0.0979669	0.0996497	84.3943
72.775	494	0.07	0.0527652	0.0536733	79.5871
72.889	495	0.114	0.0859685	0.0874507	70.3503
72.979	496	0.09	0.0678926	0.0690654	65.7499
73.049	497	0.07	0.0528191	0.0537332	64.254
73.114	498	0.065	0.0490581	0.0499088	70.2931
73.199	499	0.085	0.0641732	0.065288	65.6205
73.25	500	0.051	0.0385112	0.0391815	61.3024
73.33	501	0.08	0.0604275	0.0614813	68.561
73.39	502	0.06	0.0453307	0.0461226	70.8904
73.44	503	0.05	0.0377825	0.0384439	69.1061
73.54	504	0.1	0.0755929	0.0769185	67.2315
73.639	505	0.099	0.0748642	0.0761794	60.0546
73.749	506	0.11	0.083216	0.0846807	62.4734
73.799	507	0.05	0.0378324	0.0384995	65.8872
73.899	508	0.1	0.0756924	0.0770296	61.4443
74.075	509	0.176	0.133304	0.135664	72.2543
74.185	510	0.11	0.0833485	0.0848263	82.7653
74.255	511	0.07	0.0530534	0.0539958	85.2377
74.39	512	0.135	0.102367	0.104189	85.8366
74.515	513	0.125	0.0948274	0.096518	87.2091
74.645	514	0.13	0.0986666	0.100429	87.0678
74.78	515	0.135	0.102511	0.104346	81.6001
74.86	516	0.08	0.0607648	0.0618542	75.1869
74.955	517	0.095	0.0721828	0.0734791	83.901
75.055	518	0.1	0.076009	0.0773766	83.2773
75.185	519	0.13	0.0988575	0.100639	93.5908
75.246	520	0.061	0.0463971	0.0472349	96.721
75.361	521	0.115	0.0875056	0.0890886	95.7631
75.491	522	0.13	0.0989649	0.100758	101.207
75.561	523	0.07	0.053302	0.0542697	97.9172
75.656	524	0.095	0.0723627	0.0736788	89.765
75.746	525	0.09	0.0685759	0.0698253	88.1233
75.816	526	0.07	0.0533499	0.0543237	93.2742
75.961	527	0.145	0.110567	0.112589	87.1199
76.111	528	0.15	0.11444	0.116536	81.686
76.211	529	0.1	0.0763196	0.0777202	95.4636
76.281	530	0.07	0.0534368	0.0544192	96.082
76.411	531	0.13	0.0992846	0.101113	94.1183
76.586	532	0.175	0.133734	0.136201	104.692
76.661	533	0.075	0.0573292	0.0583888	97.4049
76.775	534	0.114	0.0871748	0.0887887	92.3416
76.88	535	0.105	0.0803216	0.0818113	88.7069
76.981	536	0.101	0.0772886	0.0787245	84.5949
77.062	537	0.081	0.0620011	0.0631551	79.5537
77.112	538	0.05	0.0382789	0.0389926	89.0649
77.271	539	0.159	0.121793	0.124068	80.1674
77.331	540	0.06	0.045969	0.0468291	71.9699
77.446	541	0.115	0.0881418	0.0897939	78.1228
77.587	542	0.141	0.108121	0.110151	79.7377
77.687	543	0.1	0.0767078	0.0781506	77.81
77.762	544	0.075	0.0575455	0.0586297	75.3623
77.852	545	0.09	0.0690756	0.0703793	82.4063
77.992	546	0.14	0.107502	0.109534	78.9355
78.062	547	0.07	0.0537635	0.0547817	73.006
78.118	548	0.056	0.0430189	0.043835	69.5425
78.203	549	0.085	0.0653151	0.0665564	74.3042
78.263	550	0.06	0.0461141	0.0469919	66.6609
78.327	551	0.064	0.0491989	0.0501371	76.9152
78.392	552	0.065	0.0499785	0.0509332	75.8652
78.432	553	0.04	0.0307601	0.0313487	77.7721
78.497	554	0.065	0.049996	0.0509543	80.0559
78.587	555	0.09	0.069246	0.0705755	87.5527
78.628	556	0.041	0.0315497	0.0321565	88.7549
78.683	557	0.055	0.0423305	0.043146	88.9754
78.758	558	0.075	0.0577378	0.058852	85.0785
78.833	559	0.075	0.0577521	0.0588685	75.0049
78.913	560	0.08	0.0616186	0.0628117	72.2933
78.983	561	0.07	0.0539287	0.0549747	72.0367
79.058	562	0.075	0.0577951	0.0589179	78.3216
79.218	563	0.16	0.123361	0.125762	73.1188
79.318	564	0.1	0.077126	0.0786295	71.9237
79.393	565	0.075	0.0578587	0.0589885	81.1633
79.498	566	0.105	0.0810301	0.082615	84.3935
79.653	567	0.155	0.119676	0.122021	82.8475
79.778	568	0.125	0.0965525	0.0984473	83.2644
79.883	569	0.105	0.0811317	0.0827265	89.712
79.993	570	0.11	0.0850254	0.0866996	89.3187
80.113	571	0.12	0.092791	0.0946211	76.994
80.183	572	0.07	0.0541403	0.0552099	81.1781
80.253	573	0.07	0.0541525	0.0552241	77.1832
80.343	574	0.09	0.0696449	0.0710253	83.8858
80.458	575	0.115	0.0890235	0.0907909	87.8292
80.583	576	0.125	0.0968035	0.0987285	95.2312
80.663	577	0.08	0.0619701	0.0632044	92.2914
80.748	578	0.085	0.0658611	0.0671751	92.8256
80.833	579	0.085	0.0658789	0.0671954	96.9058
80.923	580	0.09	0.0697741	0.0711708	87.2859
81.028	581	0.105	0.0814303	0.0830629	89.0296
81.123	582	0.095	0.0736972	0.0751772	97.9667
81.244	583	0.121	0.0939029	0.0957917	88.3084
81.359	584	0.115	0.089279	0.0910777	93.7803
81.479	585	0.12	0.0931959	0.0950766	94.7217
81.584	586	0.105	0.0815733	0.0832221	89.3478
81.694	587	0.11	0.0854872	0.0872179	88.8079
81.819	588	0.125	0.0971825	0.0991532	80.6413
81.939	589	0.12	0.0933302	0.0952258	83.2844
82.04	590	0.101	0.0785776	0.0801761	87.9854
82.115	591	0.075	0.0583633	0.0595525	71.8717
82.23	592	0.115	0.0895223	0.0913494	80.668
82.335	593	0.105	0.0817643	0.0834357	72.8975
82.43	594	0.095	0.073999	0.0755141	84.9651
82.51	595	0.08	0.0623303	0.0636085	89.0133
82.615	596	0.105	0.081835	0.0835159	76.7455
82.724	597	0.109	0.084981	0.0867292	80.5416
82.814	598	0.09	0.0701871	0.0716334	77.3711
82.915	599	0.101	0.0787899	0.080416	77.9265
83	600	0.085	0.0663256	0.0676966	82.1925
83.09	601	0.09	0.0702464	0.0717007	73.5446
83.225	602	0.135	0.105413	0.107599	77.046
83.376	603	0.151	0.11796	0.12041	71.6836
83.485	604	0.109	0.0851782	0.0869501	80.5322
83.565	605	0.08	0.0625312	0.063834	73.3541
83.649	606	0.084	0.0656744	0.0670449	71.154
83.729	607	0.08	0.0625622	0.0638697	83.7501
83.824	608	0.095	0.0743138	0.0758694	84.9409
83.908	609	0.084	0.0657256	0.0671036	74.5178
83.993	610	0.085	0.066525	0.0679219	80.0003
84.11	611	0.117	0.0916018	0.0935282	71.8504
84.225	612	0.115	0.0900668	0.0919639	81.767
84.35	613	0.125	0.0979352	0.100001	94.5151
84.45	614	0.1	0.0783714	0.0800273	96.3663
84.554	615	0.104	0.0815314	0.0832567	96.1459
84.703	616	0.149	0.116861	0.119338	106.166
84.772	617	0.069	0.0541278	0.0552768	97.2744
84.877	618	0.105	0.0823939	0.0841456	86.5188
84.966	619	0.089	0.069857	0.0713444	83.3147
85.081	620	0.115	0.0902951	0.0922206	86.8331
85.161	621	0.08	0.0628287	0.0641706	93.2413
85.276	622	0.115	0.0903466	0.0922792	94.2896
85.38	623	0.104	0.0817296	0.0834805	98.3042
85.519	624	0.139	0.109279	0.111624	103.094
85.594	625	0.075	0.0589763	0.0602436	102.113
85.678	626	0.084	0.0660696	0.0674915	97.3777
85.797	627	0.119	0.0936308	0.095649	95.3578
85.847	628	0.05	0.0393464	0.0401957	92.7504
85.981	629	0.134	0.105489	0.10777	92.6322
86.149	630	0.168	0.132319	0.135184	85.8411
86.278	631	0.129	0.10164	0.103844	90.9864
86.367	632	0.089	0.0701413	0.0716646	91.6965
86.437	633	0.07	0.0551784	0.0563785	86.4688
86.511	634	0.074	0.0583438	0.0596147	91.2079
86.611	635	0.1	0.0788654	0.0805859	86.8575
86.685	636	0.074	0.0583727	0.059648	80.9882
86.77	637	0.085	0.0670659	0.0685334	75.5205
86.874	638	0.104	0.0820813	0.08388	73.6549
86.934	639	0.06	0.0473626	0.0484021	76.0889
86.993	640	0.059	0.046581	0.0476049	80.1683
87.068	641	0.075	0.0592257	0.0605294	79.2864
87.167	642	0.099	0.0781998	0.0799237	90.6082
87.237	643	0.07	0.0553037	0.0565247	91.7621
87.322	644	0.085	0.0671705	0.0686557	91.0255
87.386	645	0.064	0.0505845	0.0517046	84.1893
87.461	646	0.075	0.0592912	0.0606061	82.5313
87.565	647	0.104	0.0822411	0.0840676	82.5374
87.759	648	0.194	0.153494	0.156908	78.0626
87.893	649	0.134	0.106061	0.108424	79.9506
88.023	650	0.13	0.102932	0.105229	84.4661
88.083	651	0.06	0.0475152	0.0485767	74.6524
88.168	652	0.085	0.067329	0.0688354	86.1675
88.297	653	0.129	0.102218	0.104508	93.8025
88.382	654	0.085	0.0673688	0.0688804	87.2968
88.467	655	0.085	0.0673845	0.0688987	92.2333
88.561	656	0.094	0.0745386	0.076216	97.0617
88.631	657	0.07	0.0555181	0.0567693	95.4574
88.696	658	0.065	0.0515617	0.0527254	86.7999
88.746	659	0.05	0.0396683	0.0405649	88.1228
88.825	660	0.079	0.0626894	0.0641084	84.9662
88.925	661	0.1	0.0793753	0.0811746	85.02
89.055	662	0.13	0.103224	0.105568	84.8016
89.16	663	0.105	0.0833973	0.0852932	78.3402
89.265	664	0.105	0.0834211	0.0853202	73.1522
89.35	665	0.085	0.0675469	0.0690868	81.7279
89.45	666	0.1	0.0794883	0.0813032	86.929
89.544	667	0.094	0.074738	0.0764468	78.5811
89.617	668	0.073	0.0580526	0.0593818	70.622
89.687	669	0.07	0.0556773	0.056954	74.6802
89.731	670	0.044	0.0350013	0.035805	83.192
89.844	671	0.113	0.089917	0.0919846	86.5182
89.939	672	0.095	0.0756131	0.0773543	82.8693
90.06	673	0.121	0.0963383	0.09856	74.1559
90.185	674	0.125	0.0995562	0.101855	73.3428
90.275	675	0.09	0.0716976	0.0733557	94.7716
90.379	676	0.104	0.0828734	0.0847927	95.2756
90.462	677	0.083	0.0661539	0.0676882	94.102
90.545	678	0.083	0.0661684	0.0677052	96.0045
90.625	679	0.08	0.0637903	0.0652739	97.5371
90.705	680	0.08	0.0638037	0.0652897	90.8702
90.779	681	0.074	0.0590299	0.0604067	80.1731
90.873	682	0.094	0.0750025	0.0767542	88.5463
90.939	683	0.066	0.0526704	0.0539023	107.988
91.049	684	0.11	0.0878094	0.089866	90.9534
91.142	685	0.093	0.0742569	0.0759985	92.6803
91.241	686	0.099	0.0790681	0.0809251	84.5249
91.312	687	0.071	0.0567159	0.0580498	81.0596
91.385	688	0.073	0.0583246	0.0596983	85.5301
91.5	689	0.115	0.0919086	0.0940763	89.1977
91.562	690	0.062	0.0495587	0.0507292	86.2466
91.755	691	0.193	0.154348	0.157999	79.9226
91.838	692	0.083	0.066392	0.0679645	81.8387
91.965	693	0.127	0.101621	0.104031	106.323
92.125	694	0.16	0.128079	0.131121	106.437
92.225	695	0.1	0.0800699	0.0819742	106.443
92.37	696	0.145	0.116144	0.11891	111.752
92.435	697	0.065	0.0520734	0.0533152	106.08
92.525	698	0.09	0.0721181	0.0738404	104.642
92.625	699	0.1	0.0801516	0.0820683	105.958
92.67	700	0.045	0.0360724	0.0369362	108.855
92.765	701	0.095	0.0761711	0.0779976	93.1374
92.895	702	0.13	0.104268	0.106772	89.4311
93.011	703	0.116	0.0930667	0.0953045	85.383
93.106	704	0.095	0.0762367	0.0780723	85.9975
93.166	705	0.06	0.0481567	0.0493178	87.4592
93.216	706	0.05	0.0401357	0.0411047	87.3516
93.305	707	0.089	0.0714574	0.073185	94.3855
93.415	708	0.11	0.0883425	0.0904812	92.1997
93.546	709	0.131	0.105242	0.107794	93.7684
93.646	710	0.1	0.0803577	0.0823084	98.3941
93.781	711	0.135	0.108519	0.111157	93.3282
93.951	712	0.17	0.136712	0.140039	86.403
94.021	713	0.07	0.0563028	0.057675	89.2143
94.081	714	0.06	0.0482667	0.0494447	83.1751
94.161	715	0.08	0.0643683	0.0659414	83.2698
94.201	716	0.04	0.0321873	0.032975	85.7563
94.287	717	0.086	0.0692174	0.0709135	87.7498
94.362	718	0.075	0.0603751	0.0618566	83.9979
94.442	719	0.08	0.0644128	0.0659954	71.5925
94.566	720	0.124	0.0998702	0.102327	73.6693
94.658	721	0.092	0.0741139	0.0759398	93.1319
94.716	722	0.058	0.0467306	0.0478834	95.0562
94.816	723	0.1	0.0805897	0.0825803	98.4406
94.881	724	0.065	0.0523916	0.0536874	96.944
95.004	725	0.123	0.0991706	0.101627	99.9184
95.073	726	0.069	0.0556416	0.0570215	97.1884
95.158	727	0.085	0.0685581	0.0702606	103.136
95.268	728	0.11	0.0887459	0.0909526	104.392
95.387	729	0.119	0.0960345	0.0984256	94.728
95.491	730	0.104	0.0839503	0.0860433	93.0188
95.561	731	0.07	0.0565146	0.0579254	90.7066
95.635	732	0.074	0.0597546	0.0612482	90.1943
95.723	733	0.088	0.0710745	0.0728535	84.8194
95.821	734	0.098	0.0791697	0.0811539	80.1516
95.89	735	0.069	0.0557511	0.0571502	78.2473
95.989	736	0.099	0.0800096	0.0820201	78.7332
96.063	737	0.074	0.0598157	0.0613208	78.3848
96.138	738	0.075	0.0606349	0.0621625	76.2005
96.256	739	0.118	0.0954256	0.0978329	79.0722
96.335	740	0.079	0.0638986	0.0655126	84.1256
96.424	741	0.089	0.0720022	0.0738233	81.9938
96.488	742	0.064	0.0517847	0.0530961	77.9189
96.602	743	0.114	0.0922663	0.094606	84.4536
96.7	744	0.098	0.0793349	0.0813493	83.1619
96.774	745	0.074	0.0599164	0.0614397	79.6428
96.888	746	0.114	0.0923283	0.0946787	80.4784
96.982	747	0.094	0.0761471	0.0780881	84.1229
97.11	748	0.128	0.103721	0.106368	81.6697
97.18	749	0.07	0.0567315	0.0581813	73.4391
97.234	750	0.054	0.0437698	0.0448898	75.5795
97.318	751	0.084	0.0680997	0.0698445	75.3192
97.378	752	0.06	0.0486494	0.0498975	72.457
97.432	753	0.054	0.04379	0.0449148	72.4345
97.502	754	0.07	0.056774	0.0582342	77.7134
97.601	755	0.099	0.080313	0.0823813	82.2707
97.76	756	0.159	0.129035	0.132362	73.5007
97.864	757	0.104	0.0844205	0.0866001	79.6308
97.939	758	0.075	0.0608906	0.0624647	74.6478
97.994	759	0.055	0.0446588	0.0458147	63.7277
98.089	760	0.095	0.0771547	0.0791543	65.5232
98.184	761	0.095	0.0771715	0.0791741	71.9509
98.276	762	0.092	0.0747502	0.0766924	71.4032
98.333	763	0.057	0.0463187	0.0475237	66.784
98.455	764	0.122	0.0991658	0.101749	76.374
98.535	765	0.08	0.0650386	0.0667349	80.6811
98.6	766	0.065	0.0528516	0.0542318	76.5546
98.698	767	0.098	0.0797017	0.0817857	71.3838
98.807	768	0.109	0.0886697	0.0909911	73.0701
98.882	769	0.075	0.0610216	0.0626212	67.4831
98.981	770	0.099	0.0805665	0.082681	73.0671
99.123	771	0.142	0.115597	0.118635	68.4084
99.171	772	0.048	0.0390793	0.0401075	78.9505
99.228	773	0.057	0.0464126	0.0476353	75.0666
99.301	774	0.073	0.0594504	0.0610185	72.5879
99.42	775	0.119	0.0969381	0.0994982	77.8085
99.467	776	0.047	0.0382905	0.039303	73.4476
99.512	777	0.045	0.0366648	0.0376355	70.1502
99.582	778	0.07	0.057043	0.0585552	66.5038
99.662	779	0.08	0.0652036	0.0669343	60.4437
99.766	780	0.104	0.0847843	0.0870374	71.7123
99.87	781	0.104	0.0848039	0.0870603	81.5084
99.97	782	0.1	0.0815603	0.0837331	77.9485
100.075	783	0.105	0.0856582	0.087943	78.7399
100.164	784	0.089	0.0726198	0.0745592	83.2268
100.259	785	0.095	0.0775317	0.0796048	80.9571
100.328	786	0.069	0.0563211	0.0578289	75.1814
100.433	787	0.105	0.0857257	0.0880236	76.6283
100.502	788	0.069	0.0563426	0.0578547	77.9716
100.557	789	0.055	0.0449162	0.0461231	75.5709
100.675	790	0.118	0.0963904	0.0989837	67.4934
100.774	791	0.099	0.0808874	0.0830662	75.8506
100.887	792	0.113	0.0923488	0.0948394	86.3557
100.99	793	0.103	0.0841952	0.0864686	87.1184
101.045	794	0.055	0.0449639	0.0461796	81.0234
101.114	795	0.069	0.0564177	0.0579449	82.9095
101.242	796	0.128	0.104688	0.107525	81.6495
101.301	797	0.059	0.0482608	0.0495703	75.7125
101.419	798	0.118	0.0965461	0.099169	79.1781
101.517	799	0.098	0.0801993	0.0823807	76.5957
101.67	800	0.153	0.12525	0.128661	77.8465
101.743	801	0.073	0.0597693	0.0613989	78.5475
101.832	802	0.089	0.0728833	0.0748729	81.335
101.945	803	0.113	0.0925595	0.0950893	89.4526
102.05	804	0.105	0.0860259	0.0883799	82.7816
102.179	805	0.129	0.105718	0.108614	86.9637
102.248	806	0.069	0.0565551	0.0581064	81.1787
102.371	807	0.123	0.100842	0.103611	78.5374
102.44	808	0.069	0.0565781	0.0581338	82.2005
102.509	809	0.069	0.0565863	0.0581441	76.3723
102.578	810	0.069	0.0565946	0.0581544	76.6255
102.656	811	0.078	0.063987	0.0657527	79.1673
102.715	812	0.059	0.0484064	0.0497438	82.5006
102.77	813	0.055	0.0451299	0.0463782	75.7277
102.883	814	0.113	0.0927433	0.0953117	78.562
102.971	815	0.088	0.0722382	0.0742411	77.2509
103.055	816	0.084	0.0689668	0.0708813	76.8209
103.164	817	0.109	0.089513	0.0920008	80.7932
103.223	818	0.059	0.0484579	0.0498063	76.2691
103.306	819	0.083	0.0681814	0.0700809	76.4731
103.365	820	0.059	0.0484723	0.0498242	78.9113
103.458	821	0.093	0.0764202	0.0785542	76.3991
103.542	822	0.084	0.0690367	0.0709668	72.9312
103.646	823	0.104	0.0854924	0.0878854	67.2527
103.73	824	0.084	0.0690636	0.0709989	70.0645
103.789	825	0.059	0.0485148	0.049876	74.0587
103.863	826	0.074	0.0608584	0.0625678	73.9499
103.968	827	0.105	0.0863718	0.0888007	71.9508
104.053	828	0.085	0.0699322	0.0719011	73.9614
104.113	829	0.06	0.04937	0.0507616	77.2147
104.177	830	0.064	0.0526682	0.0541546	76.8247
104.272	831	0.095	0.0781946	0.0804039	76.0127
104.331	832	0.059	0.0485688	0.0499427	75.568
104.426	833	0.095	0.0782192	0.0804343	75.551
104.516	834	0.09	0.074116	0.0762173	76.6618
104.611	835	0.095	0.0782486	0.0804698	79.5275
104.681	836	0.07	0.0576651	0.0593038	82.1607
104.761	837	0.08	0.0659136	0.067789	76.7656
104.941	838	0.18	0.14836	0.152586	78.9307
105.015	839	0.074	0.0610014	0.062741	74.7985
105.087	840	0.072	0.0593613	0.0610561	71.9113
105.176	841	0.089	0.0733904	0.0754881	89.1004
105.261	842	0.085	0.0701039	0.07211	91.6323
105.331	843	0.07	0.0577407	0.0593949	89.429
105.401	844	0.07	0.0577488	0.0594052	95.0248
105.487	845	0.086	0.0709608	0.0729984	95.6635
105.592	846	0.105	0.0866563	0.0891475	93.7276
105.692	847	0.1	0.0825463	0.084922	87.2295
105.777	848	0.085	0.0701762	0.0721982	87.2869
105.872	849	0.095	0.078447	0.08071	84.6206
105.927	850	0.055	0.0454216	0.0467334	87.6601
106.052	851	0.125	0.103257	0.106242	79.0501
106.143	852	0.091	0.0751843	0.0773606	73.8349
106.238	853	0.095	0.0785038	0.0807788	68.1156
106.389	854	0.151	0.124817	0.128438	69.4328
106.48	855	0.091	0.0752342	0.0774194	66.8448
106.545	856	0.065	0.0537456	0.0553084	64.7439
106.616	857	0.071	0.0587149	0.0604241	60.0277
106.701	858	0.085	0.0703041	0.0723531	60.3005
106.812	859	0.111	0.0918288	0.0945081	64.7168
106.902	860	0.09	0.0744689	0.0766441	65.2422
106.983	861	0.081	0.0670326	0.0689928	72.0128
107.033	862	0.05	0.0413821	0.0425936	68.3256
107.114	863	0.081	0.0670496	0.0690147	77.7416
107.2	864	0.086	0.0712004	0.0732895	78.1566
107.296	865	0.096	0.0794942	0.0818293	84.272
107.351	866	0.055	0.0455484	0.0468879	81.4357
107.492	867	0.141	0.116801	0.12024	85.6942
107.593	868	0.101	0.0836825	0.0861489	86.6936
107.659	869	0.066	0.0546905	0.0563043	91.6856
107.744	870	0.085	0.0704463	0.0725272	95.777
107.881	871	0.137	0.113573	0.116931	88.6641
107.931	872	0.05	0.0414538	0.0426811	76.8055
107.987	873	0.056	0.0464333	0.0478095	73.9874
108.068	874	0.081	0.0671728	0.0691659	70.1034
108.154	875	0.086	0.0713309	0.0734498	71.0416
108.23	876	0.076	0.0630457	0.0649206	70.6949
108.321	877	0.091	0.075502	0.0777497	63.5923
108.442	878	0.121	0.100416	0.103409	72.0537
108.563	879	0.121	0.100439	0.103436	82.0881
108.679	880	0.116	0.0963095	0.0991862	89.0667
108.739	881	0.06	0.0498209	0.0513107	91.4584
108.83	882	0.091	0.0755747	0.077837	79.9034
108.895	883	0.065	0.0539885	0.0556064	81.7133
108.955	884	0.06	0.0498411	0.0513364	78.2815
109.001	885	0.046	0.0382148	0.0393626	75.5576
109.071	886	0.07	0.0581606	0.0599094	65.9069
109.172	887	0.101	0.0839334	0.0864598	66.579
109.267	888	0.095	0.0789612	0.0813406	72.8998
109.353	889	0.086	0.0714921	0.0736488	76.5358
109.424	890	0.071	0.0590304	0.0608131	80.7127
109.504	891	0.08	0.066523	0.0685342	90.5368
109.61	892	0.106	0.0881603	0.0908285	85.1693
109.726	893	0.116	0.096498	0.0994218	82.9096
109.816	894	0.09	0.0748816	0.0771529	86.9051
109.887	895	0.071	0.059081	0.060875	85.9976
109.972	896	0.085	0.0707419	0.0728923	79.1356
110.057	897	0.085	0.070753	0.072906	77.0252
110.168	898	0.111	0.0924139	0.0952291	81.1207
110.309	899	0.141	0.117421	0.121002	83.6517
110.404	900	0.095	0.0791271	0.0815429	88.529
110.485	901	0.081	0.0674763	0.0695385	92.304
110.59	902	0.105	0.087486	0.0901627	92.047
110.675	903	0.085	0.0708329	0.0730025	94.0453
110.81	904	0.135	0.112527	0.115977	90.5215
110.91	905	0.1	0.0833684	0.0859274	84.2004
110.98	906	0.07	0.0583653	0.0601587	75.4736
111.098	907	0.118	0.0984082	0.101435	88.4081
111.254	908	0.156	0.130136	0.134143	95.2654
111.334	909	0.08	0.0667458	0.0688033	94.7575
111.4	910	0.066	0.0550718	0.0567713	92.3669
111.465	911	0.065	0.0542437	0.0559194	90.0029
111.555	912	0.09	0.0751187	0.0774419	87.7918
111.607	913	0.052	0.043406	0.0447498	84.5994
111.701	914	0.094	0.0784778	0.08091	81.3857
111.791	915	0.09	0.0751504	0.0774819	72.9855
111.886	916	0.095	0.0793388	0.081803	74.2268
111.965	917	0.079	0.0659858	0.0680373	79.2007
112.025	918	0.06	0.0501211	0.0516811	75.0031
112.15	919	0.125	0.104442	0.107696	79.7369
112.225	920	0.075	0.0626736	0.0646284	87.1185
112.275	921	0.05	0.0417861	0.0430908	91.887
112.405	922	0.13	0.108669	0.112065	90.8445
112.49	923	0.085	0.0710633	0.0732868	89.5875
112.54	924	0.05	0.0418056	0.0431151	87.6292
112.65	925	0.11	0.0919901	0.0948745	86.9688
112.795	926	0.145	0.12129	0.125098	83.5412
112.865	927	0.07	0.0585612	0.0604013	81.9983
112.944	928	0.079	0.0660996	0.0681787	91.8146
112.994	929	0.05	0.0418388	0.0431562	92.0929
113.059	930	0.065	0.0543966	0.0561113	78.5378
113.099	931	0.04	0.0334772	0.0345335	80.7679
113.174	932	0.075	0.0627779	0.0647609	77.1331
113.238	933	0.064	0.0535764	0.0552705	85.3899
113.268	934	0.03	0.0251153	0.0259102	79.2471
113.402	935	0.134	0.112208	0.115763	90.4803
113.537	936	0.135	0.113071	0.116658	93.8338
113.622	937	0.085	0.0712035	0.0734644	96.5835
113.737	938	0.115	0.0963532	0.0994158	99.7363
113.812	939	0.075	0.0628472	0.0648468	93.2014
113.877	940	0.065	0.0544736	0.0562087	87.139
113.987	941	0.11	0.0922035	0.0951434	84.3416
114.087	942	0.1	0.0838357	0.0865115	87.4857
114.147	943	0.06	0.0503066	0.0519139	86.3525
114.197	944	0.05	0.0419257	0.0432667	89.435
114.287	945	0.09	0.0754779	0.0778944	86.0959
114.406	946	0.119	0.0998187	0.103018	89.3527
114.471	947	0.065	0.0545289	0.0562783	93.2436
114.57	948	0.099	0.0830656	0.0857333	90.3056
114.62	949	0.05	0.0419559	0.0433047	90.324
114.665	950	0.045	0.0377632	0.0389785	86.2505
114.725	951	0.06	0.050356	0.0519782	83.7954
114.779	952	0.054	0.0453245	0.0467862	80.4856
114.859	953	0.08	0.0671565	0.0693244	77.6938
114.969	954	0.11	0.0923573	0.0953418	80.5345
115.049	955	0.08	0.067178	0.069351	77.6249
115.199	956	0.15	0.12599	0.13007	79.8808
115.264	957	0.065	0.0546018	0.0563716	84.3232
115.333	958	0.069	0.0579686	0.0598495	81.466
115.448	959	0.115	0.0966329	0.0997715	86.9683
115.483	960	0.035	0.0294117	0.030368	83.0522
115.537	961	0.054	0.0453822	0.0468592	84.1193
115.632	962	0.095	0.0798516	0.0824531	81.8311
115.677	963	0.045	0.0378273	0.0390609	82.8106
115.747	964	0.07	0.0588493	0.0607704	88.0827
115.851	965	0.104	0.0874483	0.0903059	87.0164
115.921	966	0.07	0.0588662	0.0607918	81.8837
116.016	967	0.095	0.0799024	0.0825188	74.8435
116.096	968	0.08	0.0672951	0.0695009	79.9668
116.151	969	0.055	0.0462696	0.0477877	75.2585
116.206	970	0.055	0.0462738	0.0477936	71.563
116.301	971	0.095	0.0799399	0.0825681	80.7736
116.475	972	0.174	0.146458	0.151278	85.7107
116.54	973	0.065	0.0547172	0.0565197	80.6975
116.625	974	0.085	0.0715632	0.073923	76.7985
116.685	975	0.06	0.0505201	0.0521877	79.8575
116.745	976	0.06	0.0505251	0.0521945	81.7949
116.863	977	0.118	0.099385	0.102672	88.2933
116.954	978	0.091	0.0766557	0.0791937	92.8642
117.014	979	0.06	0.0505472	0.0522224	82.0078
117.079	980	0.065	0.0547652	0.056582	82.5664
117.185	981	0.106	0.0893247	0.092291	86.9944
117.245	982	0.06	0.050566	0.0522469	94.0011
117.313	983	0.068	0.0573145	0.0592216	92.1722
117.349	984	0.036	0.0303447	0.0313554	97.0931
117.47	985	0.121	0.102012	0.105413	86.8727
117.583	986	0.113	0.0952846	0.0984645	83.688
117.695	987	0.112	0.0944583	0.0976138	103.69
117.774	988	0.079	0.0666353	0.0688635	100.106
117.889	989	0.115	0.0970185	0.100266	100.835
117.983	990	0.094	0.079314	0.0819715	100.34
118.068	991	0.085	0.0717298	0.0741355	87.5565
118.152	992	0.084	0.0708954	0.0732755	84.2135
118.236	993	0.084	0.0709048	0.0732876	79.7441
118.331	994	0.095	0.0802021	0.0828999	75.6279
118.425	995	0.094	0.0793696	0.0820421	74.9734
118.519	996	0.094	0.0793814	0.0820569	77.4518
118.588	997	0.069	0.0582757	0.0602418	75.3248
118.658	998	0.07	0.0591268	0.0611235	71.7971
118.748	999	0.09	0.0760309	0.0786011	79.8671
118.833	1000	0.085	0.0718166	0.0742466	80.4577
118.996	1001	0.163	0.137754	0.14242	70.9751
119.081	1002	0.085	0.0718445	0.0742802	87.3397
119.179	1003	0.098	0.0828451	0.0856566	88.6886
119.258	1004	0.079	0.0667915	0.0690604	85.7095
119.347	1005	0.089	0.0752566	0.0778155	78.896
119.421	1006	0.074	0.0625801	0.06471	74.8513
119.51	1007	0.089	0.0752756	0.0778402	81.3372
119.613	1008	0.103	0.0871306	0.090102	81.4479
119.668	1009	0.055	0.04653	0.0481183	83.419
119.717	1010	0.049	0.0414572	0.0428737	87.2088
119.821	1011	0.104	0.0880048	0.0910147	87.7296
119.904	1012	0.083	0.0702436	0.0726484	83.3215
120.003	1013	0.099	0.0837973	0.0866689	84.7526
120.106	1014	0.103	0.0871968	0.0901878	89.9145
120.18	1015	0.074	0.0626534	0.0648045	96.4208
120.24	1016	0.06	0.0508047	0.0525507	82.4313
120.343	1017	0.103	0.0872285	0.0902292	77.037
120.422	1018	0.079	0.0669115	0.0692155	83.9195
120.501	1019	0.079	0.0669195	0.069226	89.936
120.57	1020	0.069	0.0584548	0.0604715	81.5901
120.609	1021	0.039	0.0330416	0.0341827	81.921
120.688	1022	0.079	0.0669386	0.0692524	78.8902
120.831	1023	0.143	0.121194	0.125387	78.5062
120.93	1024	0.099	0.0839158	0.086822	77.8479
121.004	1025	0.074	0.0627319	0.0649066	77.3254
121.063	1026	0.059	0.0500205	0.0517561	78.8525
121.167	1027	0.104	0.0881855	0.0912483	81.6523
121.226	1028	0.059	0.0500327	0.0517721	88.777
121.281	1029	0.055	0.0466445	0.0482677	93.2508
121.36	1030	0.079	0.0670065	0.0693404	91.4531
121.424	1031	0.064	0.0542889	0.0561817	77.7995
121.483	1032	0.059	0.050052	0.0517987	74.334
121.558	1033	0.075	0.0636326	0.0658553	76.1755
121.637	1034	0.079	0.0670342	0.069378	89.1037
121.761	1035	0.124	0.105238	0.108921	85.8433
121.835	1036	0.074	0.0628101	0.0650104	80.9966
121.91	1037	0.075	0.063666	0.0658983	79.7699
122.009	1038	0.099	0.0840514	0.0870014	83.0427
122.109	1039	0.1	0.084913	0.087896	82.1414
122.178	1040	0.069	0.058596	0.0606564	82.9308
122.278	1041	0.1	0.0849342	0.0879236	84.8877
122.368	1042	0.09	0.076451	0.0791443	78.4539
122.423	1043	0.055	0.0467238	0.0483714	82.6632
122.493	1044	0.07	0.0594728	0.0615719	83.2666
122.588	1045	0.095	0.0807243	0.0835763	82.7847
122.638	1046	0.05	0.0424896	0.0439921	86.4072
122.774	1047	0.136	0.115595	0.119686	83.5593
122.859	1048	0.085	0.0722557	0.0748156	93.9241
122.944	1049	0.085	0.0722647	0.0748273	96.5802
123.065	1050	0.121	0.102889	0.106541	103.036
123.155	1051	0.09	0.076539	0.0792583	102.792
123.246	1052	0.091	0.0773997	0.0801521	99.6764
123.327	1053	0.081	0.0689023	0.0713549	97.0545
123.408	1054	0.081	0.0689104	0.0713655	98.1032
123.473	1055	0.065	0.0553037	0.0572758	98.4192
123.589	1056	0.116	0.0987123	0.102236	95.8446
123.66	1057	0.071	0.0604249	0.0625837	87.2006
123.771	1058	0.111	0.0944822	0.0978609	82.3402
123.842	1059	0.071	0.0604407	0.0626041	88.1606
123.927	1060	0.085	0.0723674	0.0749601	89.9674
124.089	1061	0.162	0.137956	0.142903	87.8579
124.185	1062	0.096	0.0817628	0.0846975	78.7709
124.311	1063	0.126	0.107333	0.111189	79.2309
124.402	1064	0.091	0.0775283	0.0803161	75.2268
124.493	1065	0.091	0.0775383	0.0803291	76.9365
124.554	1066	0.061	0.0519807	0.0538533	79.3854
124.614	1067	0.06	0.0511329	0.0529767	74.3673
124.66	1068	0.046	0.0392044	0.0406194	77.7458
124.736	1069	0.076	0.0647795	0.0671197	84.5553
124.816	1070	0.08	0.0681967	0.0706626	80.2307
124.892	1071	0.076	0.0647938	0.0671388	81.0826
124.978	1072	0.086	0.0733281	0.0759845	80.2873
125.058	1073	0.08	0.0682199	0.0706934	75.9405
125.129	1074	0.071	0.0605512	0.0627487	78.4663
125.265	1075	0.136	0.116007	0.120221	76.0978
125.325	1076	0.06	0.0511841	0.053045	75.2865
125.401	1077	0.076	0.06484	0.0671996	69.0629
125.497	1078	0.096	0.0819142	0.0848978	70.4765
125.572	1079	0.075	0.0640021	0.0663355	76.0691
125.693	1080	0.121	0.103274	0.107043	79.6951
125.763	1081	0.07	0.0597512	0.0619335	80.0798
125.864	1082	0.101	0.0862245	0.0893766	78.5344
125.959	1083	0.095	0.0811129	0.0840808	90.513
126.034	1084	0.075	0.0640431	0.0663886	91.4869
126.114	1085	0.08	0.0683202	0.0708246	85.0596
126.21	1086	0.096	0.0819951	0.0850035	81.4026
126.304	1087	0.094	0.0802972	0.083246	70.0373
126.354	1088	0.05	0.0427142	0.0442843	72.2196
126.399	1089	0.045	0.0384452	0.0398596	77.3611
126.468	1090	0.069	0.0589548	0.0611257	80.3832
126.531	1091	0.063	0.053833	0.0558171	68.4441
126.602	1092	0.071	0.0606748	0.0629131	61.6936
126.734	1093	0.132	0.112824	0.11699	67.1402
126.834	1094	0.1	0.0854845	0.0886437	77.7724
126.969	1095	0.135	0.115425	0.119695	78.1911
127.064	1096	0.095	0.0812357	0.0842432	81.181
127.148	1097	0.084	0.0718376	0.0744996	105.539
127.277	1098	0.129	0.110341	0.114434	110.279
127.376	1099	0.099	0.0846918	0.0878358	108.465
127.45	1100	0.074	0.0633113	0.0656637	100.375
127.515	1101	0.065	0.0556161	0.0576844	97.5651
127.584	1102	0.069	0.0590442	0.0612419	93.0259
127.649	1103	0.065	0.0556262	0.0576985	90.8895
127.728	1104	0.079	0.0676143	0.0701356	82.6121
127.787	1105	0.059	0.0505008	0.0523855	83.1515
127.871	1106	0.084	0.0719075	0.0745936	82.6365
127.94	1107	0.069	0.0590723	0.0612809	81.7843
127.999	1108	0.059	0.0505151	0.0524054	87.9029
128.034	1109	0.035	0.029968	0.0310904	92.2392
128.098	1110	0.064	0.0548032	0.0568577	82.2803
128.178	1111	0.08	0.0685113	0.0710819	86.7891
128.316	1112	0.138	0.118204	0.122643	85.6252
128.395	1113	0.079	0.0676744	0.0702181	86.8947
128.489	1114	0.094	0.080534	0.0835637	88.0438
128.583	1115	0.094	0.080544	0.0835768	96.0157
128.682	1116	0.099	0.0848393	0.0880367	94.1142
128.771	1117	0.089	0.0762786	0.0791559	98.9983
128.869	1118	0.098	0.084003	0.0871744	102.088
128.949	1119	0.08	0.0685811	0.0711726	101.799
129.038	1120	0.089	0.0763054	0.0791912	108.585
129.128	1121	0.09	0.0771718	0.080093	112.387
129.197	1122	0.069	0.0591704	0.0614122	119.862
129.262	1123	0.065	0.0557449	0.0578588	118.995
129.342	1124	0.08	0.0686163	0.0712205	117.435
129.402	1125	0.06	0.0514663	0.0534213	127.023
129.467	1126	0.065	0.0557598	0.0578798	126.982
129.552	1127	0.085	0.0729247	0.0756997	132.895
129.632	1128	0.08	0.0686422	0.0712565	127.818
129.732	1129	0.1	0.0858138	0.089085	130.09
129.807	1130	0.075	0.0643666	0.0668224	133.276
129.912	1131	0.105	0.0901254	0.093567	133.931
129.998	1132	0.086	0.0738252	0.0766467	111.901
130.048	1133	0.05	0.0429244	0.0445664	101.764
130.103	1134	0.055	0.0472202	0.049028	91.1314
130.168	1135	0.065	0.0558103	0.0579489	84.1641
130.249	1136	0.081	0.0695554	0.0722231	82.8148
130.314	1137	0.065	0.0558207	0.0579635	77.2253
130.42	1138	0.106	0.0910431	0.0945409	75.9179
130.545	1139	0.125	0.107379	0.111508	82.6351
130.631	1140	0.086	0.073885	0.0767285	83.6574
130.696	1141	0.065	0.055848	0.0579991	83.8145
130.772	1142	0.076	0.0653054	0.0678231	86.621
130.883	1143	0.111	0.0953938	0.0990745	82.5443
130.973	1144	0.09	0.0773551	0.0803424	84.9115
131.054	1145	0.081	0.0696267	0.0723179	80.938
131.124	1146	0.07	0.0601766	0.0625045	80.0777
131.215	1147	0.091	0.0782385	0.0812678	77.2727
131.286	1148	0.071	0.0610487	0.0634144	71.67
131.351	1149	0.065	0.0558942	0.0580621	77.9612
131.437	1150	0.086	0.0739603	0.0768313	79.4796
131.533	1151	0.096	0.0825703	0.0857783	84.2621
131.633	1152	0.1	0.0860215	0.0893664	92.3464
131.749	1153	0.116	0.0997994	0.103683	93.7839
131.835	1154	0.086	0.0739971	0.0768794	91.1365
131.921	1155	0.086	0.0740051	0.0768901	94.2647
132.003	1156	0.082	0.0705702	0.0733237	87.0305
132.068	1157	0.065	0.0559443	0.058129	93.7658
132.16	1158	0.092	0.0791917	0.0822869	93.2165
132.21	1159	0.05	0.0430416	0.0447253	94.0429
132.281	1160	0.071	0.0611245	0.0635176	89.5499
132.357	1161	0.076	0.0654352	0.0679992	85.9125
132.423	1162	0.066	0.0568299	0.0590586	86.6373
132.498	1163	0.075	0.0645854	0.0671204	90.4804
132.579	1164	0.081	0.0697592	0.0724996	81.9924
132.68	1165	0.101	0.0869945	0.0904149	79.3121
132.751	1166	0.071	0.0611599	0.0635666	74.1775
132.822	1167	0.071	0.0611652	0.0635741	78.9062
132.877	1168	0.055	0.0473847	0.0492525	80.2639
132.968	1169	0.091	0.0784088	0.0815021	80.7965
133.084	1170	0.116	0.0999638	0.103911	80.585
133.19	1171	0.106	0.091358	0.0949683	81.3182
133.276	1172	0.086	0.0741284	0.0770603	84.7711
133.377	1173	0.101	0.0870685	0.090515	81.9195
133.443	1174	0.066	0.0569008	0.0591551	84.2114
133.519	1175	0.076	0.0655281	0.0681264	79.9672
133.604	1176	0.085	0.0732956	0.0762043	77.3156
133.67	1177	0.066	0.0569164	0.059177	82.1107
133.766	1178	0.096	0.0827971	0.0860883	80.3411
133.841	1179	0.075	0.0646911	0.0672647	82.5721
133.932	1180	0.091	0.0785004	0.0816261	84.127
134.007	1181	0.075	0.064704	0.0672824	90.9559
134.073	1182	0.066	0.056944	0.0592151	93.3212
134.174	1183	0.101	0.0871521	0.090631	88.5804
134.234	1184	0.06	0.0517772	0.0538458	88.6768
134.314	1185	0.08	0.0690429	0.0718035	91.7396
134.43	1186	0.116	0.100126	0.104133	90.9106
134.511	1187	0.081	0.0699223	0.0727228	92.4817
134.581	1188	0.07	0.0604317	0.0628541	86.9119
134.657	1189	0.076	0.0656175	0.0682499	87.3022
134.757	1190	0.1	0.0863491	0.089816	87.3916
134.862	1191	0.105	0.0906778	0.0943216	92.7026
134.928	1192	0.066	0.0570019	0.0592944	88.5529
134.998	1193	0.07	0.0604615	0.0628952	90.1606
135.038	1194	0.04	0.0345511	0.0359429	71.1536
135.098	1195	0.06	0.0518303	0.0539199	69.1549
135.143	1196	0.045	0.0388748	0.0404434	73.4943
135.199	1197	0.056	0.0483807	0.0503345	74.6859
135.268	1198	0.069	0.0596167	0.0620263	80.4217
135.363	1199	0.095	0.0820902	0.0854108	69.9755
135.423	1200	0.06	0.0518501	0.0539492	70.4602
135.483	1201	0.06	0.0518537	0.0539547	79.733
135.573	1202	0.09	0.0777887	0.0809431	99.2512
135.678	1203	0.105	0.0907646	0.0944482	98.3299
135.708	1204	0.03	0.0259337	0.026987	105.646
135.773	1205	0.065	0.0561938	0.0584781	99.9805
135.857	1206	0.084	0.0726268	0.0755816	91.4594
135.957	1207	0.1	0.0864705	0.0899914	87.1656
136.017	1208	0.06	0.0518859	0.0540003	91.2538
136.112	1209	0.095	0.0821617	0.0855126	85.6129
136.142	1210	0.03	0.0259467	0.0270058	74.223
136.236	1211	0.094	0.0813085	0.08463	76.8696
136.326	1212	0.09	0.0778566	0.0810397	71.2361
136.391	1213	0.065	0.056234	0.058535	70.1602
136.465	1214	0.074	0.0640257	0.0666476	67.4325
136.545	1215	0.08	0.0692233	0.0720604	76.9624
136.624	1216	0.079	0.0683642	0.0711684	74.5957
136.694	1217	0.07	0.0605807	0.0630676	74.1076
136.768	1218	0.074	0.0640479	0.0666793	77.3517
136.843	1219	0.075	0.064919	0.0675883	77.3406
136.922	1220	0.079	0.0683875	0.0712017	81.3056
136.977	1221	0.055	0.0476145	0.0495755	80.2574
137.08	1222	0.103	0.0891795	0.0928553	80.5249
137.164	1223	0.084	0.0727358	0.0757363	81.6365
137.224	1224	0.06	0.0519577	0.0541028	74.4864
137.313	1225	0.089	0.0770784	0.0802631	73.5332
137.402	1226	0.089	0.0770861	0.0802737	74.0936
137.536	1227	0.134	0.11608	0.120884	81.979
137.581	1228	0.045	0.038984	0.0405986	86.0575
137.734	1229	0.153	0.132568	0.138064	86.0256
137.833	1230	0.099	0.0857891	0.089348	86.5828
137.907	1231	0.074	0.0641305	0.0667931	85.034
138.011	1232	0.104	0.0901399	0.0938853	91.5529
138.081	1233	0.07	0.0606758	0.063199	84.7249
138.136	1234	0.055	0.0476768	0.049661	83.7001
138.205	1235	0.069	0.0598173	0.0623088	84.4884
138.289	1236	0.084	0.0728278	0.0758637	85.4504
138.338	1237	0.049	0.0424852	0.0442576	84.8001
138.423	1238	0.085	0.0737058	0.0767832	81.5597
138.477	1239	0.054	0.0468277	0.0487844	79.649
138.547	1240	0.07	0.0607073	0.0632459	77.9991
138.591	1241	0.044	0.0381607	0.0397578	79.0669
138.646	1242	0.055	0.0477038	0.0497019	75.4616
138.731	1243	0.085	0.073731	0.0768217	73.4251
138.825	1244	0.094	0.0815462	0.0849672	70.8298
138.914	1245	0.089	0.0772162	0.0804582	70.5492
139.038	1246	0.124	0.107597	0.112118	70.9628
139.088	1247	0.05	0.0433882	0.0452128	71.0142
139.173	1248	0.085	0.0737668	0.0768713	75.7809
139.262	1249	0.089	0.0772457	0.0804992	77.0367
139.361	1250	0.099	0.0859343	0.0895566	79.1763
139.451	1251	0.09	0.0781298	0.0814257	74.6653
139.525	1252	0.074	0.0642452	0.0669576	75.5747
139.589	1253	0.064	0.0555673	0.0579152	70.3933
139.669	1254	0.08	0.0694652	0.0724026	76.2164
139.768	1255	0.099	0.0859724	0.0896107	77.7446
139.833	1256	0.065	0.0564505	0.0588413	79.2099
139.893	1257	0.06	0.0521115	0.0543203	88.627
139.973	1258	0.08	0.069488	0.0724357	81.6596
140.038	1259	0.065	0.056463	0.05886	72.6879
140.138	1260	0.1	0.0868755	0.0905665	79.4639
140.208	1261	0.07	0.0608174	0.0634034	84.0195
140.253	1262	0.045	0.0390988	0.0407626	88.7223
140.358	1263	0.105	0.0912409	0.0951265	84.8057
140.443	1264	0.085	0.0738684	0.0770167	75.4108
140.518	1265	0.075	0.0651832	0.0679635	79.7464
140.618	1266	0.1	0.0869203	0.0906306	70.5483
140.673	1267	0.055	0.047809	0.0498514	59.8386
140.708	1268	0.035	0.030425	0.0317258	61.5977
140.808	1269	0.1	0.0869379	0.0906577	79.7174
140.898	1270	0.09	0.0782516	0.0816024	70.0297
140.958	1271	0.06	0.0521711	0.0544068	67.7662
141.018	1272	0.06	0.0521744	0.054412	77.1962
141.123	1273	0.105	0.0913153	0.0952346	77.3658
141.188	1274	0.065	0.0565324	0.0589607	72.3184
141.262	1275	0.074	0.064365	0.0671319	71.3089
141.322	1276	0.06	0.0521912	0.0544365	71.9105
141.402	1277	0.08	0.0695941	0.0725904	72.3024
141.487	1278	0.085	0.0739503	0.0771367	66.8152
141.587	1279	0.1	0.0870095	0.0907615	70.6432
141.657	1280	0.07	0.0609112	0.0635398	70.7859
141.706	1281	0.049	0.04264	0.0444815	62.8767
141.766	1282	0.06	0.0522155	0.0544724	64.4362
141.841	1283	0.075	0.0652745	0.068098	70.2914
141.906	1284	0.065	0.0565751	0.0590241	76.3999
141.996	1285	0.09	0.0783421	0.081736	66.1389
142.08	1286	0.084	0.0731257	0.0762961	69.1742
142.14	1287	0.06	0.0522359	0.0545024	69.3958
142.225	1288	0.085	0.0740074	0.077221	68.296
142.3	1289	0.075	0.0653057	0.0681436	67.5008
142.384	1290	0.084	0.0731488	0.07633	79.1909
142.454	1291	0.07	0.0609618	0.063615	69.6353
142.518	1292	0.064	0.0557402	0.058168	78.6891
142.623	1293	0.105	0.0914586	0.0954452	80.7883
142.678	1294	0.055	0.0479096	0.0499996	76.6829
142.762	1295	0.084	0.0731774	0.076372	81.6372
142.837	1296	0.075	0.065342	0.0681967	79.8051
142.916	1297	0.079	0.0688325	0.071842	67.8852
142.981	1298	0.065	0.0566381	0.0591164	76.9912
143.041	1299	0.06	0.0522845	0.0545741	78.8213
143.15	1300	0.109	0.0949941	0.0991571	69.159
143.22	1301	0.07	0.0610098	0.0636855	63.5443
143.319	1302	0.099	0.086294	0.0900814	66.1927
143.374	1303	0.055	0.0479438	0.0500497	64.5202
143.473	1304	0.099	0.0863075	0.0901013	78.9245
143.568	1305	0.095	0.0828283	0.086472	75.418
143.637	1306	0.069	0.0601637	0.0628124	77.0177
143.722	1307	0.085	0.0741211	0.0773867	78.6937
143.786	1308	0.064	0.0558125	0.0582733	82.0867
143.901	1309	0.115	0.1003	0.104725	80.974
143.985	1310	0.084	0.0732686	0.076504	83.6947
144.075	1311	0.09	0.0785092	0.0819786	82.4336
144.165	1312	0.09	0.0785163	0.0819886	79.0414
144.214	1313	0.049	0.0427498	0.0446419	74.8444
144.299	1314	0.085	0.0741642	0.0774491	79.5087
144.413	1315	0.114	0.0994786	0.103888	73.1904
144.482	1316	0.069	0.0602149	0.062886	77.7591
144.552	1317	0.07	0.0610919	0.0638039	77.0353
144.632	1318	0.08	0.0698248	0.0729269	73.2921
144.696	1319	0.064	0.0558634	0.0583471	67.0912
144.766	1320	0.07	0.0611049	0.0638236	65.062
144.871	1321	0.105	0.0916669	0.0957484	60.975
144.971	1322	0.1	0.0873105	0.091201	65.1303
145.026	1323	0.055	0.0480234	0.0501649	70.8448
145.091	1324	0.065	0.0567585	0.0592915	66.8149
145.161	1325	0.07	0.0611288	0.0638588	65.9116
145.24	1326	0.079	0.0689936	0.0720772	68.8377
145.315	1327	0.075	0.0655051	0.0684349	68.3973
145.36	1328	0.045	0.0393048	0.0410641	69.1807
145.459	1329	0.099	0.086479	0.0903527	72.422
145.524	1330	0.065	0.0567827	0.0593282	64.6712
145.614	1331	0.09	0.0786292	0.0821566	67.5263
145.693	1332	0.079	0.0690243	0.0721231	80.6448
145.777	1333	0.084	0.0733989	0.0766966	80.4592
145.87	1334	0.093	0.0812705	0.0849245	85.1867
145.955	1335	0.085	0.0742856	0.0776281	80.5835
146.095	1336	0.14	0.122369	0.12788	89.3297
146.2	1337	0.105	0.0917865	0.0959225	84.1032
146.265	1338	0.065	0.0568238	0.0593862	83.7136
146.315	1339	0.05	0.0437127	0.0456854	78.5291
146.39	1340	0.075	0.0655738	0.0685353	81.3792
146.435	1341	0.045	0.039346	0.0411243	74.4487
146.505	1342	0.07	0.061209	0.0639775	69.4841
146.576	1343	0.071	0.0620877	0.0648979	76.5606
146.646	1344	0.07	0.0612173	0.0639903	69.6604
146.707	1345	0.061	0.0533497	0.055768	73.9498
146.753	1346	0.046	0.0402327	0.0420578	73.1121
146.83	1347	0.077	0.067351	0.0704085	79.55
146.877	1348	0.047	0.0411122	0.0429799	82.4463
146.938	1349	0.061	0.0533615	0.0557875	81.7336
146.989	1350	0.051	0.0446159	0.0466458	79.007
147.04	1351	0.051	0.0446181	0.0466495	78.9859
147.136	1352	0.096	0.0839946	0.0878218	83.7583
147.212	1353	0.076	0.0665006	0.0695328	82.6695
147.309	1354	0.097	0.0848836	0.0887569	89.5723
147.39	1355	0.081	0.0708876	0.0741247	86.4918
147.456	1356	0.066	0.0577639	0.0604036	76.7544
147.598	1357	0.142	0.124297	0.129981	74.1439
147.664	1358	0.066	0.0577753	0.0604194	76.0207
147.796	1359	0.132	0.115565	0.120858	73.3095
147.856	1360	0.06	0.0525325	0.0549402	77.1306
147.932	1361	0.076	0.0665459	0.0695981	75.9661
148.024	1362	0.092	0.0805626	0.0842603	77.3283
148.069	1363	0.045	0.0394073	0.0412174	80.5849
148.125	1364	0.056	0.0490427	0.051297	76.6537
148.196	1365	0.071	0.0621833	0.0650437	75.9027
148.257	1366	0.061	0.0534282	0.0558876	75.8839
148.332	1367	0.075	0.065695	0.0687213	76.1996
148.393	1368	0.061	0.0534349	0.0558983	79.6964
148.463	1369	0.07	0.0613228	0.0641519	82.2602
148.548	1370	0.085	0.0744693	0.0779073	87.3598
148.633	1371	0.085	0.0744752	0.077916	93.3925
148.688	1372	0.055	0.0481923	0.0504204	102.275
148.773	1373	0.085	0.0744849	0.0779311	97.6543
148.833	1374	0.06	0.0525805	0.055015	82.0951
148.898	1375	0.065	0.0569656	0.0596051	77.7842
148.973	1376	0.075	0.0657341	0.0687821	93.4297
149.028	1377	0.055	0.0482075	0.0504444	94.3899
149.083	1378	0.055	0.0482099	0.0504486	91.9337
149.168	1379	0.085	0.0745121	0.0779746	82.913
149.302	1380	0.134	0.117481	0.122944	82.0075
149.411	1381	0.109	0.0955721	0.10002	82.9318
149.485	1382	0.074	0.0648882	0.06791	83.9174
149.575	1383	0.09	0.0789246	0.0826028	86.6625
149.654	1384	0.079	0.0692833	0.0725144	84.0405
149.738	1385	0.084	0.0736739	0.0771123	86.8806
149.87	1386	0.132	0.115787	0.121195	84.6678
149.965	1387	0.095	0.0833389	0.087234	81.7955
150.035	1388	0.07	0.0614115	0.0642838	83.6493
150.124	1389	0.089	0.0780867	0.0817415	97.3075
150.178	1390	0.054	0.0473808	0.0496	97.0174
150.208	1391	0.03	0.0263234	0.0275572	94.6385
150.286	1392	0.078	0.0684456	0.071656	94.2893
150.345	1393	0.059	0.0517757	0.054206	92.3111
150.424	1394	0.079	0.0693317	0.0725884	93.2234
150.454	1395	0.03	0.0263292	0.0275668	95.3808
150.578	1396	0.124	0.10884	0.113959	91.844
150.692	1397	0.114	0.100072	0.104783	87.0084
150.771	1398	0.079	0.0693533	0.0726203	86.0733
150.85	1399	0.079	0.0693582	0.0726278	83.5537
150.939	1400	0.089	0.078144	0.0818303	82.7718
151.029	1401	0.09	0.0790283	0.082759	83.5933
151.073	1402	0.044	0.0386376	0.0404629	80.8006
151.113	1403	0.04	0.0351263	0.0367869	83.6304
151.197	1404	0.084	0.0737708	0.0772608	88.6612
151.277	1405	0.08	0.0702629	0.0735893	93.066
151.312	1406	0.035	0.030741	0.0321973	99.9003
151.367	1407	0.055	0.0483096	0.0505999	97.4879
151.43	1408	0.063	0.0553396	0.057965	91.6847
151.507	1409	0.077	0.0676418	0.0708532	82.6952
151.575	1410	0.068	0.0597392	0.0625774	78.5875
151.666	1411	0.091	0.0799516	0.0837527	92.072
151.755	1412	0.089	0.0782006	0.081921	91.6816
151.83	1413	0.075	0.0659037	0.0690414	85.1028
151.91	1414	0.08	0.0703022	0.0736517	89.5693
151.975	1415	0.065	0.0571238	0.0598473	89.071
152.093	1416	0.118	0.103712	0.108661	86.3761
152.184	1417	0.091	0.079988	0.0838069	69.3619
152.244	1418	0.06	0.0527421	0.055262	70.9394
152.34	1419	0.096	0.0843944	0.0884294	68.5249
152.405	1420	0.065	0.0571453	0.0598794	70.8965
152.466	1421	0.061	0.0536315	0.0561993	67.0187
152.561	1422	0.095	0.0835314	0.0875335	64.2607
152.632	1423	0.071	0.0624326	0.0654259	67.6128
152.717	1424	0.085	0.0747487	0.0783351	65.4026
152.763	1425	0.046	0.0404539	0.0423962	71.2915
152.843	1426	0.08	0.0703594	0.0737399	70.5486
152.904	1427	0.061	0.0536519	0.0562315	66.3795
152.995	1428	0.091	0.0800443	0.0838955	70.2139
153.045	1429	0.05	0.0439823	0.0460999	68.7189
153.121	1430	0.076	0.0668575	0.0700787	61.4556
153.195	1431	0.074	0.0651022	0.0682411	74.6695
153.243	1432	0.048	0.0422302	0.0442677	76.5093
153.354	1433	0.111	0.0976666	0.102382	80.9794
153.455	1434	0.101	0.0888755	0.0931695	81.6928
153.506	1435	0.051	0.0448797	0.0470496	85.3816
153.592	1436	0.086	0.075685	0.0793469	87.2337
153.647	1437	0.055	0.0484055	0.0507491	87.5238
153.703	1438	0.056	0.049288	0.0516759	89.2535
153.805	1439	0.102	0.0897823	0.0941352	91.1455
153.875	1440	0.07	0.061619	0.0646085	95.9172
153.962	1441	0.087	0.0765892	0.0803076	94.8869
154.063	1442	0.101	0.0889215	0.0932417	108.105
154.109	1443	0.046	0.0405005	0.0424695	99.2664
154.17	1444	0.061	0.0537099	0.056323	85.2786
154.251	1445	0.081	0.0713246	0.074797	88.8159
154.332	1446	0.081	0.0713295	0.0748046	87.7371
154.428	1447	0.096	0.0845455	0.0886673	86.1415
154.494	1448	0.066	0.0581283	0.0609641	82.0316
154.57	1449	0.076	0.0669398	0.0702078	79.4302
154.636	1450	0.066	0.0581352	0.0609752	78.1319
154.702	1451	0.066	0.0581384	0.0609806	78.5664
154.799	1452	0.097	0.0854528	0.0896331	76.2545
154.829	1453	0.03	0.0264294	0.0277232	74.9863
154.91	1454	0.081	0.0713641	0.07486	70.6683
155.002	1455	0.092	0.0810617	0.0850354	68.2042
155.083	1456	0.081	0.0713744	0.0748756	74.387
155.165	1457	0.082	0.0722605	0.0758076	83.2987
155.247	1458	0.082	0.0722654	0.0758152	85.6975
155.323	1459	0.076	0.0669819	0.0702744	84.375
155.384	1460	0.061	0.0537645	0.0564091	87.17
155.466	1461	0.082	0.0722785	0.0758362	95.1524
155.542	1462	0.076	0.066994	0.0702939	96.9034
155.593	1463	0.051	0.0449584	0.0471744	99.2143
155.684	1464	0.091	0.0802259	0.0841829	98.2398
155.72	1465	0.036	0.0317387	0.0333052	99.0517
155.755	1466	0.035	0.0308579	0.032382	94.3624
155.811	1467	0.056	0.049375	0.0518153	89.9944
155.892	1468	0.081	0.0714221	0.0749545	86.2555
155.973	1469	0.081	0.0714268	0.0749619	75.0067
156.044	1470	0.071	0.0626123	0.0657132	77.4393
156.125	1471	0.081	0.0714357	0.074976	80.5133
156.186	1472	0.061	0.0538	0.056468	77.4224
156.227	1473	0.041	0.0361618	0.0379564	76.1292
156.288	1474	0.061	0.0538044	0.0564763	77.1224
156.364	1475	0.076	0.0670392	0.0703706	79.615
156.395	1476	0.031	0.0273456	0.0287054	80.7116
156.435	1477	0.04	0.0352858	0.0370417	83.157
156.476	1478	0.041	0.0361692	0.0379702	77.619
156.532	1479	0.056	0.049404	0.0518657	76.3048
156.613	1480	0.081	0.0714641	0.0750274	70.5674
156.658	1481	0.045	0.0397037	0.0416847	67.8048
156.729	1482	0.071	0.0626472	0.0657751	65.908
156.815	1483	0.086	0.0758879	0.0796794	66.1841
156.876	1484	0.061	0.0538301	0.0565214	70.8268
156.972	1485	0.096	0.0847228	0.0889614	70.6045
157.038	1486	0.066	0.05825	0.0611662	69.3574
157.145	1487	0.107	0.0944437	0.099175	62.2078
157.251	1488	0.106	0.093569	0.0982597	78.7907
157.333	1489	0.082	0.0723883	0.0760196	82.0158
157.388	1490	0.055	0.0485553	0.0509927	80.5768
157.414	1491	0.026	0.0229539	0.0241069	84.2838
157.5	1492	0.086	0.0759296	0.0797462	81.5934
157.545	1493	0.045	0.039732	0.0417305	80.9216
157.601	1494	0.056	0.0494465	0.0519353	82.7072
157.697	1495	0.096	0.0847719	0.0890416	87.4206
157.752	1496	0.055	0.0485694	0.0510173	83.8704
157.798	1497	0.046	0.0406231	0.0426719	90.2613
157.878	1498	0.08	0.0706534	0.0742191	88.4936
157.933	1499	0.055	0.0485763	0.0510295	85.0071
157.974	1500	0.041	0.0362126	0.0380426	80.6575
158.049	1501	0.075	0.0662466	0.0695965	83.9702
158.109	1502	0.06	0.0529998	0.0556816	69.0143
158.2	1503	0.091	0.0803887	0.0844593	67.8576
158.25	1504	0.05	0.0441714	0.0464095	65.0378
158.376	1505	0.126	0.111323	0.116967	66.0508
158.472	1506	0.096	0.0848239	0.0891275	66.85
158.557	1507	0.085	0.0751095	0.0789228	67.0784
158.658	1508	0.101	0.0892548	0.0937893	61.8091
158.708	1509	0.05	0.0441873	0.0464336	67.1783
158.753	1510	0.045	0.0397699	0.0417931	68.726
158.883	1511	0.13	0.114903	0.120752	70.8832
158.958	1512	0.075	0.0662938	0.0696707	67.8033
159.004	1513	0.046	0.0406617	0.0427343	67.3532
159.053	1514	0.049	0.0433152	0.0455245	86.2065
159.183	1515	0.13	0.114929	0.120795	86.6033
159.288	1516	0.105	0.0928351	0.0975765	83.272
159.352	1517	0.064	0.056588	0.0594801	102.917
159.416	1518	0.064	0.0565908	0.0594849	112.924
159.505	1519	0.089	0.078702	0.0827295	105.113
159.573	1520	0.068	0.060135	0.0632144	96.9747
159.687	1521	0.114	0.100823	0.10599	85.4838
159.726	1522	0.039	0.0344933	0.0362619	84.124
159.834	1523	0.108	0.0955277	0.100429	80.0785
159.913	1524	0.079	0.069881	0.0734689	76.8352
159.977	1525	0.064	0.0566152	0.0595239	78.7681
160.061	1526	0.084	0.0743123	0.0781326	78.7305
160.13	1527	0.069	0.0610454	0.0641858	67.5351
160.209	1528	0.079	0.0698968	0.0734949	63.4315
160.258	1529	0.049	0.0433553	0.0455886	60.3226
160.317	1530	0.059	0.0522057	0.0548966	63.7421
160.362	1531	0.045	0.0398193	0.0418731	69.3922
160.431	1532	0.069	0.0610594	0.0642108	67.5223
160.51	1533	0.079	0.0699128	0.0735235	68.0749
160.559	1534	0.049	0.0433652	0.0456063	69.5128
160.643	1535	0.084	0.0743451	0.0781898	67.5898
160.717	1536	0.074	0.0654982	0.0688875	70.4792
160.781	1537	0.064	0.0566498	0.0595832	74.3578
160.826	1538	0.045	0.0398333	0.0418972	77.3369
160.885	1539	0.059	0.0522281	0.0549361	65.3779
160.959	1540	0.074	0.0655101	0.0689089	62.7723
161.014	1541	0.055	0.048692	0.0512198	70.3821
161.093	1542	0.079	0.0699435	0.073577	71.4358
161.163	1543	0.07	0.0619785	0.0652004	78.2442
161.272	1544	0.109	0.0965173	0.101538	83.7356
161.346	1545	0.074	0.0655291	0.06894	86.4692
161.465	1546	0.119	0.105387	0.110876	90.6043
161.51	1547	0.045	0.0398537	0.0419308	94.0878
161.589	1548	0.079	0.0699695	0.0736185	94.7245
161.653	1549	0.064	0.0566868	0.059645	89.2359
161.763	1550	0.11	0.0974384	0.102527	92.0176
161.822	1551	0.059	0.0522647	0.0549957	86.7365
161.911	1552	0.089	0.0788452	0.0829677	86.8512
161.966	1553	0.055	0.0487265	0.0512759	88.8768
162.056	1554	0.09	0.0797396	0.0839143	89.1697
162.15	1555	0.094	0.0832894	0.0876527	90.0105
162.195	1556	0.045	0.0398739	0.0419641	83.8658
162.269	1557	0.074	0.065574	0.0690137	82.9222
162.354	1558	0.085	0.0753262	0.07928	83.7553
162.409	1559	0.055	0.0487424	0.0513025	87.1309
162.478	1560	0.069	0.0611527	0.0643667	86.5783
162.568	1561	0.09	0.0797697	0.0839647	88.3703
162.628	1562	0.06	0.0531821	0.0559807	79.3293
162.687	1563	0.059	0.052298	0.0550519	77.7185
162.742	1564	0.055	0.0487543	0.0513232	76.5023
162.827	1565	0.085	0.0753523	0.0793252	71.1652
162.901	1566	0.074	0.0656043	0.0690655	76.4357
162.981	1567	0.08	0.0709277	0.0746722	83.3207
163.051	1568	0.07	0.0620649	0.0653436	84.0506
163.111	1569	0.06	0.0532008	0.056013	84.1339
163.186	1570	0.075	0.0665046	0.0700223	85.7778
163.24	1571	0.054	0.0478852	0.0504196	93.9121
163.315	1572	0.075	0.0665108	0.0700333	96.5239
163.375	1573	0.06	0.053211	0.0560309	99.1597
163.445	1574	0.07	0.0620826	0.0653747	103.728
163.49	1575	0.045	0.0399115	0.0420293	108.971
163.57	1576	0.08	0.0709579	0.0747255	103.676
163.654	1577	0.084	0.0745103	0.078469	98.5188
163.724	1578	0.07	0.0620951	0.0653962	96.6214
163.824	1579	0.1	0.0887136	0.0934329	91.8801
163.889	1580	0.065	0.0576665	0.0607362	85.6866
163.969	1581	0.08	0.0709782	0.0747589	87.6521
164.039	1582	0.07	0.0621091	0.0654194	86.3858
164.129	1583	0.09	0.0798596	0.0841187	88.6109
164.209	1584	0.08	0.0709904	0.0747788	87.6246
164.248	1585	0.039	0.0346088	0.0364569	83.1136
164.353	1586	0.105	0.0931844	0.0981636	88.0318
164.452	1587	0.099	0.0878658	0.0925637	95.0416
164.522	1588	0.07	0.0621304	0.0654544	93.3908
164.603	1589	0.081	0.0718978	0.0757469	93.716
164.658	1590	0.055	0.0488214	0.0514367	94.4633
164.778	1591	0.12	0.106528	0.112239	90.3947
164.887	1592	0.109	0.0967708	0.101961	99.3342
164.963	1593	0.076	0.0674768	0.0710983	97.8906
165.028	1594	0.065	0.0577131	0.0608125	98.034
165.078	1595	0.05	0.0443962	0.046782	106.225
165.178	1596	0.1	0.0887987	0.0935735	97.4261
165.233	1597	0.055	0.0488412	0.051469	90.254
165.333	1598	0.1	0.0888083	0.0935896	85.1012
165.383	1599	0.05	0.0444057	0.0467979	95.8888
165.461	1600	0.078	0.0692767	0.0730111	95.8605
165.553	1601	0.092	0.0817162	0.0861239	94.5402
165.593	1602	0.04	0.0355298	0.0374474	97.1878
165.65	1603	0.057	0.0506319	0.0533664	115.498
165.73	1604	0.08	0.0710663	0.0749068	115.545
165.81	1605	0.08	0.0710702	0.0749133	106.286
165.887	1606	0.077	0.0684087	0.0721102	95.758
165.941	1607	0.054	0.0479767	0.0505743	94.6119
165.998	1608	0.057	0.0506441	0.0533878	102.263
166.088	1609	0.09	0.0799693	0.0843045	92.0007
166.18	1610	0.092	0.0817516	0.0861861	87.2393
166.266	1611	0.086	0.0764245	0.0805726	82.6534
166.345	1612	0.079	0.0702077	0.0740208	82.2158
166.444	1613	0.099	0.0879878	0.0927695	82.3602
166.516	1614	0.072	0.0639943	0.0674742	84.9314
166.618	1615	0.102	0.0906649	0.0955982	80.2024
166.698	1616	0.08	0.0711136	0.0749855	81.1625
166.768	1617	0.07	0.0622274	0.0656175	83.3179
166.842	1618	0.074	0.0657865	0.0693728	83.3816
166.921	1619	0.079	0.0702353	0.0740665	83.5754
166.975	1620	0.054	0.0480107	0.0506312	88.3635
167.025	1621	0.05	0.0444559	0.0468839	89.263
167.079	1622	0.054	0.0480141	0.050638	87.6596
167.172	1623	0.093	0.0826962	0.0872183	95.6807
167.284	1624	0.112	0.0995986	0.105048	106.218
167.352	1625	0.068	0.0604734	0.0637843	113.421
167.42	1626	0.068	0.0604761	0.0637893	109.232
167.507	1627	0.087	0.0773784	0.0816202	108.434
167.618	1628	0.111	0.0987316	0.104147	101.194
167.667	1629	0.049	0.0435856	0.0459779	99.2278
167.72	1630	0.053	0.0471453	0.0497345	101.485
167.779	1631	0.059	0.0524846	0.0553688	98.609
167.895	1632	0.116	0.103198	0.108873	101.275
167.968	1633	0.073	0.0649468	0.0685202	99.3336
168.056	1634	0.088	0.0782966	0.0826072	102.745
168.124	1635	0.068	0.0605047	0.0638378	106.464
168.178	1636	0.054	0.0480495	0.0506982	94.5876
168.252	1637	0.074	0.0658489	0.0694809	95.2372
168.306	1638	0.054	0.0480536	0.0507057	94.8606
168.38	1639	0.074	0.0658545	0.0694913	102.024
168.454	1640	0.074	0.0658577	0.0694969	98.1295
168.548	1641	0.094	0.0836623	0.0882881	97.5891
168.593	1642	0.045	0.0400523	0.0422682	96.645
168.658	1643	0.065	0.0578558	0.0610587	101.935
168.718	1644	0.06	0.0534075	0.0563659	103.255
168.788	1645	0.07	0.0623116	0.0657653	98.8404
168.858	1646	0.07	0.0623145	0.0657705	90.0552
169.023	1647	0.165	0.1469	0.155052	95.1414
169.078	1648	0.055	0.0489684	0.0516876	96.4884
169.149	1649	0.071	0.0632167	0.0667292	93.6989
169.25	1650	0.101	0.089934	0.0949339	89.4951
169.315	1651	0.065	0.0578807	0.0611006	90.9907
169.432	1652	0.117	0.104193	0.109993	96.3444
169.514	1653	0.082	0.0730282	0.0770957	99.8238
169.57	1654	0.056	0.0498748	0.0526544	99.5718
169.673	1655	0.103	0.0917401	0.096856	97.9518
169.745	1656	0.072	0.064132	0.0677105	99.0577
169.817	1657	0.072	0.064135	0.0677158	95.369
169.889	1658	0.072	0.0641379	0.0677211	95.132
169.972	1659	0.083	0.0739408	0.0780741	98.8095
170.039	1660	0.067	0.0596897	0.0630284	88.6234
170.116	1661	0.077	0.068602	0.0724415	81.8304
170.178	1662	0.062	0.0552402	0.0583337	87.229
170.255	1663	0.077	0.0686081	0.0724527	89.0417
170.369	1664	0.114	0.101583	0.107279	87.5645
170.415	1665	0.046	0.0409909	0.0432906	88.5249
170.487	1666	0.072	0.0641626	0.0677645	83.9512
170.554	1667	0.067	0.0597094	0.0630634	85.2571
170.652	1668	0.098	0.0873416	0.0922507	88.2855
170.729	1669	0.077	0.0686289	0.0724886	85.9806
170.801	1670	0.072	0.0641755	0.0677868	93.7223
170.867	1671	0.066	0.05883	0.0621425	92.0204
170.913	1672	0.046	0.0410039	0.0433141	90.9787
171.015	1673	0.102	0.0909276	0.0960536	91.7271
171.076	1674	0.061	0.0543804	0.0574479	91.5139
171.131	1675	0.055	0.0490332	0.0518007	100.415
171.243	1676	0.112	0.0998564	0.105496	98.7759
171.293	1677	0.05	0.0445802	0.0470994	98.0753
171.378	1678	0.085	0.0757904	0.0800758	98.5446
171.438	1679	0.06	0.0535011	0.0565281	97.5704
171.515	1680	0.077	0.0686631	0.0725502	94.1896
171.583	1681	0.068	0.0606401	0.0640751	87.9097
171.647	1682	0.064	0.0570753	0.0603103	81.3284
171.743	1683	0.096	0.0856181	0.0904738	93.7468
171.808	1684	0.065	0.057973	0.0612628	93.7841
171.902	1685	0.094	0.0838428	0.0886034	94.7848
171.976	1686	0.074	0.0660069	0.0697571	97.9946
172.054	1687	0.078	0.0695783	0.0735337	96.8145
172.133	1688	0.079	0.0704737	0.0744824	93.0966
172.167	1689	0.034	0.0303311	0.0320574	96.0584
172.226	1690	0.059	0.0526353	0.0556329	94.9431
172.304	1691	0.078	0.0695891	0.0735545	88.5435
172.397	1692	0.093	0.0829764	0.0877075	91.7949
172.446	1693	0.049	0.04372	0.0462143	87.6648
172.504	1694	0.058	0.0517521	0.0547064	85.3652
172.597	1695	0.093	0.0829866	0.0877267	93.3546
172.67	1696	0.073	0.065143	0.0688661	89.4177
172.757	1697	0.087	0.0776403	0.0820803	85.556
172.858	1698	0.101	0.0901397	0.0952976	95.8723
172.936	1699	0.078	0.0696162	0.073602	87.5728
173.028	1700	0.092	0.082116	0.0868203	89.4117
173.067	1701	0.039	0.0348109	0.0368063	89.332
173.194	1702	0.127	0.113367	0.11987	85.2315
173.238	1703	0.044	0.0392779	0.0415321	86.5989
173.311	1704	0.073	0.0651686	0.0689108	80.2463
173.405	1705	0.094	0.0839205	0.0887424	83.5514
173.469	1706	0.064	0.0571396	0.0604246	90.6453
173.577	1707	0.108	0.0964293	0.101977	91.2154
173.657	1708	0.08	0.0714326	0.0755443	99.1696
173.722	1709	0.065	0.0580413	0.0613841	100.093
173.767	1710	0.045	0.0401835	0.0424992	97.31
173.822	1711	0.055	0.0491148	0.0519469	95.1627
173.943	1712	0.121	0.108061	0.114295	92.4352
174.052	1713	0.109	0.0973502	0.10297	102.246
174.153	1714	0.101	0.0902107	0.0954215	105.681
174.228	1715	0.075	0.0669911	0.070863	103.294
174.328	1716	0.1	0.0893269	0.0944927	100.004
174.398	1717	0.07	0.0625314	0.0661498	100.379
174.473	1718	0.075	0.067001	0.0708802	100.132
174.534	1719	0.061	0.0544961	0.0576532	93.1414
174.635	1720	0.101	0.0902367	0.0954674	97.2949
174.73	1721	0.095	0.0848809	0.089804	97.2805
174.841	1722	0.111	0.0991832	0.104939	93.5976
174.956	1723	0.115	0.102764	0.108732	95.52
175.012	1724	0.056	0.0500434	0.0529511	94.7675
175.122	1725	0.11	0.098306	0.104021	92.5437
175.187	1726	0.065	0.0580921	0.0614714	92.0993
175.323	1727	0.136	0.121556	0.128631	96.8204
175.408	1728	0.085	0.0759765	0.0804012	93.1941
175.478	1729	0.07	0.0625715	0.0662176	108.385
175.549	1730	0.071	0.063468	0.0671685	111.613
175.604	1731	0.055	0.0491669	0.0520353	109.711
175.644	1732	0.04	0.0357586	0.037846	92.1766
175.734	1733	0.09	0.0804611	0.0851606	94.8567
175.799	1734	0.065	0.058113	0.0615092	96.4291
175.889	1735	0.09	0.0804684	0.0851738	101.779
175.98	1736	0.091	0.0813668	0.0861275	95.2422
176.048	1737	0.068	0.060804	0.0643636	92.5089
176.088	1738	0.04	0.0357679	0.0378631	90.7249
176.163	1739	0.075	0.0670677	0.0709986	89.3247
176.253	1740	0.09	0.0804855	0.0852055	95.5891
176.308	1741	0.055	0.0491871	0.0520734	91.9036
176.393	1742	0.085	0.0760202	0.0804835	84.7899
176.432	1743	0.039	0.0348806	0.0369298	76.6667
176.562	1744	0.13	0.116278	0.123112	71.8243
176.667	1745	0.105	0.0939222	0.0994461	88.953
176.738	1746	0.071	0.0635119	0.0672494	94.9675
176.807	1747	0.069	0.0617253	0.0653598	95.2863
176.892	1748	0.085	0.0760421	0.0805222	99.8624
176.957	1749	0.065	0.058152	0.06158	102.045
177.017	1750	0.06	0.0536806	0.0568469	93.8724
177.106	1751	0.089	0.0796303	0.0843299	89.236
177.181	1752	0.075	0.067107	0.0710698	84.3391
177.266	1753	0.085	0.0760583	0.0805523	90.9446
177.355	1754	0.089	0.0796416	0.08435	88.7485
177.429	1755	0.074	0.0662216	0.0701389	86.9882
177.499	1756	0.07	0.0626446	0.0663524	83.1717
177.588	1757	0.089	0.0796521	0.0843692	84.9758
177.672	1758	0.084	0.0751809	0.0796357	93.3743
177.757	1759	0.085	0.0760795	0.0805902	90.9885
177.871	1760	0.114	0.102043	0.108096	97.4513
177.981	1761	0.11	0.0984683	0.104313	96.8497
178.037	1762	0.056	0.0501309	0.0531082	101.528
178.116	1763	0.079	0.0707235	0.0749263	95.1063
178.197	1764	0.081	0.0725173	0.0768291	87.1729
178.286	1765	0.089	0.0796835	0.0844241	79.7485
178.41	1766	0.124	0.111027	0.117636	91.2636
178.504	1767	0.094	0.0841703	0.0891836	92.5663
178.599	1768	0.095	0.0850703	0.09014	89.4474
178.688	1769	0.089	0.0797013	0.0844539	86.3816
178.733	1770	0.045	0.0402994	0.0427038	83.0919
178.808	1771	0.075	0.0671685	0.0711783	78.2609
178.888	1772	0.08	0.0716496	0.0759293	83.5959
178.982	1773	0.094	0.0841927	0.0892244	89.801
179.062	1774	0.08	0.0716565	0.0759415	91.865
179.12	1775	0.058	0.0519526	0.0550611	84.6231
179.192	1776	0.072	0.0644955	0.0683566	90.0993
179.26	1777	0.068	0.0609147	0.0645635	98.5297
179.317	1778	0.057	0.0510625	0.0541229	98.4393
179.368	1779	0.051	0.0456887	0.0484286	77.927
179.478	1780	0.11	0.0985503	0.104464	75.7914
179.578	1781	0.1	0.0895961	0.0949751	91.3765
179.643	1782	0.065	0.0582395	0.061738	104.128
179.743	1783	0.1	0.0896042	0.0949898	90.5038
179.843	1784	0.1	0.0896091	0.094998	86.5914
179.898	1785	0.055	0.0492865	0.0522522	95.8935
179.964	1786	0.066	0.0591459	0.0627069	86.4102
180.019	1787	0.055	0.0492897	0.052259	92.3936
180.125	1788	0.106	0.0950002	0.100726	101.444
180.235	1789	0.11	0.098591	0.104537	93.9334
180.346	1790	0.111	0.0994933	0.105497	97.0308
180.412	1791	0.066	0.0591603	0.0627322	89.0723
180.477	1792	0.065	0.058266	0.0617858	88.7579
180.573	1793	0.096	0.0860588	0.0912605	90.5056
180.715	1794	0.142	0.127305	0.135004	88.8134
180.836	1795	0.121	0.108485	0.11505	90.4514
180.892	1796	0.056	0.0502096	0.0532496	92.1909
180.983	1797	0.091	0.0815945	0.0865375	93.2886
181.049	1798	0.066	0.0591805	0.0627677	100.649
181.146	1799	0.097	0.086982	0.0922573	88.1045
181.272	1800	0.126	0.112994	0.119851	87.8172
181.374	1801	0.102	0.0914767	0.0970308	89.6664
181.46	1802	0.086	0.0771309	0.0818166	91.7213
181.516	1803	0.056	0.0502263	0.0532792	83.2225
181.633	1804	0.117	0.104944	0.111326	86.7839
181.678	1805	0.045	0.0403639	0.0428201	86.2402
181.765	1806	0.087	0.0780404	0.082792	86.2646
181.846	1807	0.081	0.0726614	0.077088	100.297
181.926	1808	0.08	0.0717674	0.0761419	101.847
182.009	1809	0.083	0.0744619	0.0790032	101.289
182.118	1810	0.109	0.0977929	0.10376	105.281
182.202	1811	0.084	0.0753667	0.0799683	98.3322
182.354	1812	0.152	0.136389	0.144721	100.449
182.448	1813	0.094	0.0843498	0.0895056	97.9024
182.535	1814	0.087	0.078072	0.0828467	91.8305
182.601	1815	0.066	0.059229	0.0628534	90.3283
182.68	1816	0.079	0.0708983	0.0752391	83.5836
182.757	1817	0.077	0.0691062	0.0733396	83.1219
182.833	1818	0.076	0.0682114	0.0723923	82.6302
182.92	1819	0.087	0.0780876	0.0828765	86.213
183.051	1820	0.131	0.117588	0.124804	87.2699
183.101	1821	0.05	0.0448821	0.0476377	88.9867
183.157	1822	0.056	0.0502694	0.0533575	86.3154
183.208	1823	0.051	0.0457823	0.0485963	100.376
183.278	1824	0.07	0.0628407	0.0667053	97.0351
183.383	1825	0.105	0.0942662	0.100067	112.131
183.444	1826	0.061	0.0547659	0.0581376	113.83
183.554	1827	0.11	0.0987637	0.104848	97.4189
183.628	1828	0.074	0.0664435	0.0705387	97.9838
183.713	1829	0.085	0.0763236	0.0810303	110.382
183.811	1830	0.098	0.088001	0.0934309	107.382
183.909	1831	0.098	0.0880054	0.0934386	106.527
183.991	1832	0.082	0.0736403	0.078189	99.8324
184.059	1833	0.068	0.0610697	0.064844	99.581
184.164	1834	0.105	0.0943038	0.100135	101.823
184.24	1835	0.076	0.0682606	0.072484	106.342
184.331	1836	0.091	0.0817368	0.0867969	106.319
184.387	1837	0.056	0.050301	0.0534167	109.375
184.506	1838	0.119	0.106896	0.113521	109.772
184.595	1839	0.089	0.0799511	0.0849087	111.152
184.676	1840	0.081	0.0727674	0.0772821	110.328
184.727	1841	0.051	0.0458177	0.0486619	107.51
184.85	1842	0.123	0.110508	0.117372	103.947
184.955	1843	0.105	0.0943414	0.100204	110.764
185.06	1844	0.105	0.0943463	0.100213	112.244
185.112	1845	0.052	0.0467251	0.049632	99.1313
185.204	1846	0.092	0.0826713	0.0878173	97.8998
185.267	1847	0.063	0.0566136	0.0601396	100.596
185.399	1848	0.132	0.118627	0.126019	103.739
185.493	1849	0.094	0.0844806	0.0897479	114.103
185.598	1850	0.105	0.0943716	0.100259	115.436
185.743	1851	0.145	0.130332	0.138467	108.898
185.822	1852	0.079	0.0710112	0.0754459	113.729
185.907	1853	0.085	0.0764077	0.081182	121.974
186.002	1854	0.095	0.0854008	0.09074	118.828
186.082	1855	0.08	0.0719193	0.0764181	104.735
186.152	1856	0.07	0.0629316	0.0668703	106.538
186.242	1857	0.09	0.0809156	0.0859826	100.419
186.313	1858	0.071	0.0638356	0.0678353	92.9175
186.393	1859	0.08	0.0719303	0.0764395	87.3103
186.473	1860	0.08	0.0719331	0.076445	91.237
186.54	1861	0.067	0.0602459	0.0640268	89.9407
186.603	1862	0.063	0.0566509	0.0602081	99.5805
186.698	1863	0.095	0.0854299	0.0907971	104.597
186.808	1864	0.11	0.0989241	0.105142	104.775
186.883	1865	0.075	0.0674507	0.0716929	100.47
186.953	1866	0.07	0.0629561	0.0669178	85.5894
187.028	1867	0.075	0.0674554	0.0717026	91.6882
187.108	1868	0.08	0.0719553	0.0764881	81.3772
187.178	1869	0.07	0.062963	0.0669315	81.7851
187.283	1870	0.105	0.0944492	0.100406	84.0414
187.393	1871	0.11	0.0989521	0.105196	91.9551
187.468	1872	0.075	0.0674697	0.0717292	93.784
187.573	1873	0.105	0.0944624	0.100429	97.2078
187.658	1874	0.085	0.0764727	0.0813058	99.7347
187.783	1875	0.125	0.112467	0.119578	96.8289
187.847	1876	0.064	0.0575846	0.0612279	103.04
187.887	1877	0.04	0.0359911	0.0382694	98.1128
187.967	1878	0.08	0.0719849	0.0765442	101.095
188.022	1879	0.055	0.0494909	0.0526272	100.527
188.108	1880	0.086	0.0773889	0.0822958	90.7467
188.193	1881	0.085	0.0764922	0.0813447	85.4234
188.248	1882	0.055	0.0494962	0.0526379	82.4716
188.332	1883	0.084	0.0755972	0.0803982	83.567
188.392	1884	0.06	0.0539996	0.0574307	82.6831
188.432	1885	0.04	0.0360004	0.0382891	86.1981
188.492	1886	0.06	0.0540021	0.0574371	86.1279
188.592	1887	0.1	0.0900077	0.0957361	89.7547
188.682	1888	0.09	0.0810104	0.0861689	92.3776
188.772	1889	0.09	0.0810138	0.0861753	94.1637
188.853	1890	0.081	0.0729152	0.0775632	90.439
188.927	1891	0.074	0.0666162	0.070865	81.7004
188.993	1892	0.066	0.0594163	0.0632079	80.7397
189.048	1893	0.055	0.0495148	0.0526763	79.6381
189.158	1894	0.11	0.0990348	0.105361	91.6928
189.258	1895	0.1	0.0900358	0.0957905	85.979
189.353	1896	0.095	0.0855378	0.0910079	99.6776
189.493	1897	0.14	0.126064	0.13413	104.536
189.603	1898	0.11	0.0990553	0.105397	96.0588
189.717	1899	0.114	0.102663	0.109238	100.554
189.806	1900	0.089	0.0801522	0.0852889	104.21
189.871	1901	0.065	0.0585399	0.0622935	101.214
189.906	1902	0.035	0.031522	0.0335443	86.8816
189.966	1903	0.06	0.0540392	0.0575079	93.9919
190.021	1904	0.055	0.0495372	0.0527186	101.565
190.147	1905	0.126	0.113492	0.120784	102.397
190.242	1906	0.095	0.0855729	0.0910745	107.785
190.321	1907	0.079	0.0711632	0.0757408	105.317
190.421	1908	0.1	0.0900841	0.0958818	103.191
190.466	1909	0.045	0.0405387	0.0431491	103.248
190.586	1910	0.12	0.108109	0.115074	102.766
190.691	1911	0.105	0.0946	0.100698	107.512
190.811	1912	0.12	0.10812	0.115093	109.786
190.891	1913	0.08	0.0720827	0.0767342	107.885
190.957	1914	0.066	0.05947	0.0633096	99.106
191.022	1915	0.065	0.0585707	0.0623542	98.3083
191.117	1916	0.095	0.085607	0.0911399	107.221
191.203	1917	0.086	0.0774998	0.0825114	108.084
191.328	1918	0.125	0.112651	0.11994	99.6262
191.388	1919	0.06	0.0540741	0.0575746	99.9258
191.468	1920	0.08	0.0721015	0.0767713	111.104
191.523	1921	0.055	0.049571	0.0527833	105.343
191.598	1922	0.075	0.067599	0.0719819	109.499
191.648	1923	0.05	0.045067	0.0479906	103.104
191.683	1924	0.035	0.0315474	0.033595	104.967
191.788	1925	0.105	0.0946467	0.100793	100.911
191.879	1926	0.091	0.0820305	0.0873603	101.883
191.959	1927	0.08	0.0721173	0.0768054	94.2505
192.055	1928	0.096	0.0865444	0.0921734	90.8392
192.105	1929	0.05	0.0450762	0.0480096	91.5795
192.181	1930	0.076	0.0685182	0.0729794	92.0849
192.326	1931	0.145	0.130734	0.13925	93.3169
192.431	1932	0.105	0.0946737	0.100844	98.2663
192.526	1933	0.095	0.0856608	0.0912469	103.417
[truncated: 9,408 more rows]

## Sheet: 100-yr Nitrate Calcium
Top Year (before 1950)	Bottom Year (before 1950)	Median Nitrate Concentration (ppb)	Median Calcium Concentration (ppb)
-65	-1	119.858	7.30167
0	99	84.6792	4.07998
100	199	78.8171	4.30909
200	299	69.1296	4.27561
300	399	75.7886	4.36894
400	499	75.275	3.04234
500	599	83.0559	2.52163
600	699	86.4935	2.51608
700	799	79.8972	1.28904
800	899	78.0015	1.14096
900	999	85.5503	0.720744
1000	1099	81.6212	1.12038
1100	1199	86.9033	0.696389
1200	1299	77.014	0.663291
1300	1399	79.6232	0.77907
1400	1499	81.8543	0.96571
1500	1599	84.6176	1.4362
1600	1699	94.6983	1.40679
1700	1799	92.2922	0.998604
1800	1899	97.9431	0.805074
1900	1999	99.1416	0.691026
2000	2099	97.4755	0.643352
2100	2199	95.6233	1.30332
2200	2299	77.071	0.910952
2300	2399	66.0451	0.838381
2400	2499	64.4763	0.696964
2500	2599	60.1205	0.493707
2600	2699	73.3295	0.469922
2700	2799	79.731	0.758053
2800	2899	83.1705	0.696966
2900	2999	80.614	0.426658
3000	3099	83.1911	0.471073
3100	3199	89.2756	0.696083
3200	3299	93.8667	0.477314
3300	3399	86.6855	0.759765
3400	3499	87.6306	0.740161
3500	3599	80.5667	0.721746
3600	3699	91.7303	0.629408
3700	3799	96.8034	0.610958
3800	3899	93.1803	0.676991
3900	3999	90.0509	0.88475
4000	4099	86.38	0.79751
4100	4199	86.1661	1.00755
4200	4299	86.7729	0.871324
4300	4399	86.0244	0.611878
4400	4499	81.8635	0.707952
4500	4599	85.6762	1.29979
4600	4699	81.7526	0.899706
4700	4799	77.671	0.616851
4800	4899	73.7114	0.740595
4900	4999	85.7895	1.0472
5000	5099	84.0275	0.706885
5100	5199	96.5097	2.77366
5200	5299	88.4137	2.35556
5300	5399	86.4382	1.38312
5400	5499	78.2793	1.67938
5500	5599	79.1043	1.72863
5600	5699	82.898	1.20464
5700	5799	84.9757	1.20658
5800	5899	79.8962	1.10393
5900	5999	86.1392	1.13507
6000	6099	92.7861	1.0799
6100	6199	89.1539	1.13224
6200	6299	87.2512	1.84814
6300	6399	92.0736	1.24486
6400	6499	88.3546	1.43987
6500	6599	92.859	1.1776
6600	6699	89.6103	0.960337
6700	6799	84.589	1.07928
6800	6899	79.2149	0.796118
6900	6999	74.9038	1.2625
7000	7099	70.9217	1.05427
7100	7199	67.9329	1.02432
7200	7299	66.9249	1.40561
7300	7399	71.2754	1.43074
7400	7499	64.3537	1.63219
7500	7599	68.5999	1.20238
7600	7699	65.4812	1.07198
7700	7799	64.0986	1.17845
7800	7899	63.0938	1.01108
7900	7999	60.4851	1.59316
8000	8099	55.3011	0.910953
8100	8199	60.8443	0.895677
8200	8299	65.7435	0.619282
8300	8399	63.7688	0.68896
8400	8499	90.2605	0.909669
8500	8599	79.4248	1.45578
8600	8699	69.2209	1.09769
8700	8799	79.8643	0.535574
8800	8899	69.3912	0.699834
8900	8999	66.0254	0.778252
9000	9099	62.422	0.914194
9100	9199	72.1693	0.719151
9200	9299	63.4215	0.465465
9300	9399	64.4646	0.827069
9400	9499	64.7546	0.510425
9500	9599	66.3883	0.648028
9600	9699	62.0827	0.610334
9700	9799	61.3008	0.614607
9800	9899	58.4733	0.58663
9900	9999	75.0262	0.612823
10000	10099	67.6133	0.739559
10100	10199	63.2349	0.739208
10200	10299	67.8791	1.16083
10300	10399	70.1489	1.21408
10400	10499	72.8747	1.72622
10500	10599	77.9921	1.57983
10600	10699	68.3973	1.16912
10700	10799	74.1798	0.751012
10800	10899	70.8286	0.777561
10900	10999	70.4904	0.800895
11000	11099	75.4673	1.88735
11100	11199	68.6215	1.42293
11200	11299	72.3079	0.713942
11300	11399	77.5707	0.590049
11400	11499	80.2282	0.703415
11500	11599	67.4323	0.59015
11600	11699	66.6494	0.504434
11700	11799	62.4654	1.23013
11800	11899	58.5575	1.33487
11900	11999	56.7002	0.431968
12000	12099	55.6561	0.488568
12100	12199	54.2376	0.879017
12200	12299	54.9059	1.12025
12300	12399	47.3139	0.996793
12400	12499	40.0193	0.784517
12500	12599	38.5666	1.04986
12600	12699	36.8328	1.10107
12700	12799	39.7955	1.45914
12800	12899	41.402	1.35044
12900	12999	45.4625	1.43826
13000	13099	40.5149	1.36373
13100	13199	39.9346	1.50819
13200	13299	35.5213	1.6718
13300	13399	41.0261	1.44364
13400	13499	39.9605	1.53181
13500	13599	33.8246	1.33123
13600	13699	37.601	1.42112
13700	13799	37.1392	1.65608
13800	13899	34.8446	1.54587
13900	13999	32.7577	1.34717
14000	14099	39.6043	1.51548
14100	14199	41.7439	1.55344
14200	14299	44.2764	1.58206
14300	14399	46.7633	1.56337
14400	14499	48.1923	1.73163
14500	14599	40.6555	2.01124
14600	14699	36.9516	1.94154
14700	14799	57.129	2.32611
14800	14899	50.2094	2.20418
14900	14999	44.2107	2.00823
15000	15099	56.0484	2.75649
15100	15199	49.4386	2.52283
15200	15299	57.2072	2.86039
15300	15399	60.3044	2.88571
15400	15499	60.0783	3.34361
15500	15599	58.4431	2.83391
15600	15699	67.7584	3.48008
15700	15799	80.1688	4.48897
15800	15899	65.2185	4.04658
15900	15999	81.0418	5.42221
16000	16099	82.1855	6.68844
16100	16199	88.1537	5.97351
16200	16299	88.6765	6.95014
16300	16399	83.216	9.73895
16400	16499	96.8995	12.234
16500	16599	98.2318	7.72479
16600	16699	99.5676	7.57809
16700	16799	101.311	12.6976
16800	16899	86.9835	11.3472
16900	16999	83.8576	12.8013
17000	17099	103.99	16.4169
17100	17199	101.451	19.0518
17200	17299	95.7479	18.8997
17300	17399	101.635	21.903
17400	17499	106.332	19.6597
17500	17599	99.2044	18.9304
17600	17699	88.7911	21.5613
17700	17799	111.096	23.6382
17800	17899	108.394	24.1447
17900	17999	116.993	29.1961
18000	18099	115.247	34.4017
18100	18199	112.693	25.0209
18200	18299	121.215	23.3576
18300	18399	126.865	24.7406
18400	18499	120.708	35.1739
18500	18599	138.67	28.0396
18600	18699	130.075	28.1381
18700	18799	121.798	25.1052
18800	18899	133.333	28.2115
18900	18999	131.698	28.5839
19000	19099	119.92	28.6187
19100	19199	125.266	26.9613
19200	19299	134.441	27.746
19300	19399	134.004	26.9838
19400	19499	128.082	25.5664
19500	19599	128.665	31.0295
19600	19699	144.741	26.628
19700	19799	135.522	24.8866
19800	19899	134.114	32.1072
19900	19999	141.381	35.8403
20000	20099	147.992	34.9737
20100	20199	140.963	37.5607
20200	20299	162.965	30.8883
20300	20399	140.97	23.8787
20400	20499	133.135	27.9573
20500	20599	142.459	30.8453
20600	20699	141.713	34.5142
20700	20799	130.704	26.189
20800	20899	139.86	32.0119
20900	20999	125.5	34.0094
21000	21099	131.54	35.5388
21100	21199	121.903	34.6145
21200	21299	128.226	34.0814
21300	21399	114.225	35.2443
21400	21499	128.251	36.0961
21500	21599	117.379	33.9003
21600	21699	124.585	35.5014
21700	21799	122.468	39.4927
21800	21899	133.699	39.9889
21900	21999	117.961	37.1845
22000	22099	131.894	37.9019
22100	22199	110.371	32.9561
22200	22299	111.566	34.7053
22300	22399	118.815	31.6649
22400	22499	118.68	32.8021
22500	22599	102.702	31.4522
22600	22699	103.031	28.774
22700	22799	111.918	30.0202
22800	22899	111.495	29.8299
22900	22999	109.639	27.5083
23000	23099	115.855	29.7834
23100	23199	97.1617	27.4385
23200	23299	109.219	22.9497
23300	23399	102.77	24.42
23400	23499	101.84	25.6844
23500	23599	98.457	25.9756
23600	23699	74.4084	21.9078
23700	23799	95.1831	25.5215
23800	23899	89.9809	26.5891
23900	23999	118.821	38.0181
24000	24099	101.476	32.4709
24100	24199	108.95	32.0432
24200	24299	102.766	33.7201
24300	24399	90.0368	33.77
24400	24499	116.018	34.688
24500	24599	110.82	34.5662
24600	24699	119.489	32.6443
24700	24799	115.3	38.3609
24800	24899	97.2951	37.4479
24900	24999	103.924	39.5834
25000	25099	97.6197	36.3863
25100	25199	91.2626	41.5898
25200	25299	101.174	35.8741
25300	25399	112.305	37.7127
25400	25499	100.621	41.8165
25500	25599	91.5137	51.9995
25600	25699	100.958	48.723
25700	25799	109.258	53.6582
25800	25899	105.936	47.8517
25900	25999	114.589	50.2851
26000	26099	104.806	44.5717
26100	26199	118.408	41.5626
26200	26299	112.198	39.878
26300	26399	109.736	36.2487
26400	26499	125.015	37.4472
26500	26599	110.76	25.315
26600	26699	126.151	35.2986
26700	26799	127.304	35.2798
26800	26899	116.61	32.7141
26900	26999	128.715	30.1366
27000	27099	136.716	31.7875
27100	27199	121.351	30.484
27200	27299	122.402	29.2131
27300	27399	135.46	28.9689
27400	27499	128.279	26.5811
27500	27599	124.378	23.1073
27600	27699	107.823	20.6687
27700	27799	117.249	22.2366
27800	27899	102.302	28.5547
27900	27999	109.9	27.3568
28000	28099	92.4509	27.0486
28100	28199	100.073	32.2713
28200	28299	97.9148	34.7262
28300	28399	93.6895	35.1303
28400	28499	108.87	44.7687
28500	28599	111.025	45.1887
28600	28699	112.008	36.4897
28700	28799	103.504	25.7161
28800	28899	112.434	26.5397
28900	28999	112.128	23.7401
29000	29099	95.3669	16.0628
29100	29199	87.8022	17.9676
29200	29299	86.4005	19.4159
29300	29399	94.1152	20.6985
29400	29499	95.7928	22.4693
29500	29599	94.7874	21.1659
29600	29699	98.7853	21.1917
29700	29799	91.6219	22.8299
29800	29899	92.7158	22.5292
29900	29999	97.893	NaN
30000	30099	99.7583	32.0622
30100	30199	108.431	37.0654
30200	30299	109.785	37.7049
30300	30399	110.984	37.5958
30400	30499	114.607	29.0025
30500	30599	122.906	30.7526
30600	30699	116.579	27.7535
30700	30799	114.555	28.3715
30800	30899	112.123	24.3467
30900	30999	104.792	24.9705
31000	31099	116.317	30.7596
31100	31199	111.679	24.6904
31200	31299	108.388	24.5177
31300	31399	111.174	24.7855
31400	31499	104.957	22.0173
31500	31599	117.74	24.9248
31600	31699	111.578	34.4543
31700	31799	108.424	31.9332
31800	31899	114.268	33.5098
31900	31999	116.857	24.3352
32000	32099	100.04	19.8914
32100	32199	112.069	17.3716
32200	32299	94.0369	16.3679
32300	32399	99.0691	13.3385
32400	32499	84.173	11.5207
32500	32599	84.4096	15.6515
32600	32699	91.7425	14.9085
32700	32799	81.5698	14.0415
32800	32899	80.9261	14.8342
32900	32999	88.6393	16.3772
33000	33099	95.7063	19.003
33100	33199	109.908	20.8223
33200	33299	91.862	23.2494
33300	33399	105.589	22.398
33400	33499	100.215	18.5584
33500	33599	97.4994	14.8045
33600	33699	99.1274	13.0738
33700	33799	94.0527	13.0235
33800	33899	99.4964	14.0143
33900	33999	98.3811	16.9904
34000	34099	102.188	17.2653
34100	34199	100.16	18.3322
34200	34299	99.4702	18.1539
34300	34399	96.0212	17.1796
34400	34499	108.985	18.7816
34500	34599	105.778	19.5839
34600	34699	110.654	19.9871
34700	34799	110.185	19.9732
34800	34899	110.771	18.3226
34900	34999	124.556	18.411
35000	35099	118.694	17.2973
35100	35199	96.0296	12.8489
35200	35299	102.9	13.1304
35300	35399	98.9469	10.5858
35400	35499	86.215	8.48421
35500	35599	97.2613	10.1789
35600	35699	91.916	10.5881
35700	35799	84.54	11.1516
35800	35899	81.886	9.77284
35900	35999	81.7184	10.3833
36000	36099	80.8849	9.94133
36100	36199	78.7291	9.72477
36200	36299	86.3942	13.1278
36300	36399	96.4901	15.622
36400	36499	98.4225	15.6193
36500	36599	100.692	15.6877
36600	36699	94.8923	14.7907
36700	36799	99.9193	12.7506
36800	36899	101.994	13.5912
36900	36999	105.31	14.3142
37000	37099	95.8799	13.9816
37100	37199	88.1698	10.6963
37200	37299	85.8119	7.9654
37300	37399	88.5496	8.37917
37400	37499	88.7805	8.81984
37500	37599	81.0393	8.09615
37600	37699	74.2375	9.42376
37700	37799	77.9067	8.00356
37800	37899	67.6889	8.67757
37900	37999	69.0382	6.98049
38000	38099	72.232	8.50837
38100	38199	62.2777	7.51665
38200	38299	54.35	3.99359
38300	38399	50.0196	5.4555
38400	38499	54.0579	6.53318
38500	38599	51.8505	6.90819
38600	38699	39.4859	4.97049
38700	38799	39.1547	5.79768
38800	38899	44.2179	5.2029
38900	38999	43.8454	5.84863
39000	39099	47.7055	5.56307
39100	39199	55.126	5.45567
39200	39299	45.9383	6.34516
39300	39399	47.6324	6.18071
39400	39499	62.6034	9.0792
39500	39599	63.896	8.97138
39600	39699	76.6088	10.2769
39700	39799	93.02	13.7079
39800	39899	83.2562	13.7471
39900	39999	95.1118	16.2169
40000	40099	89.8019	13.7922
40100	40199	103.49	13.4556
40200	40299	96.4794	15.5656
40300	40399	99.4323	15.2294
40400	40499	96.6835	14.0802
40500	40599	103.7	14.5928
40600	40699	99.5993	14.8893
40700	40799	98.1286	16.6949
40800	40899	118.558	14.6045
40900	40999	109.881	15.1192
41000	41099	134.735	17.4671
41100	41199	115.46	14.4502
41200	41299	108.956	13.3045
41300	41399	121.941	11.4967
41400	41499	133.234	10.563
41500	41599	104.918	9.42035
41600	41699	106.856	12.6607
41700	41799	102.185	12.8658
41800	41899	88.257	11.0291
41900	41999	82.8567	13.3325
42000	42099	102.277	13.9262
42100	42199	110.392	15.2534
42200	42299	103.117	17.2951
42300	42399	99.7733	16.528
42400	42499	108.099	14.911
42500	42599	104.371	17.2101
42600	42699	94.5297	14.8493
42700	42799	100.109	13.6675
42800	42899	81.0311	12.4112
42900	42999	65.3373	10.4055
43000	43099	75.6579	9.51554
43100	43199	75.3502	8.53044
43200	43299	64.6442	8.06809
43300	43399	62.5123	6.30076
43400	43499	59.207	8.23198
43500	43599	64.558	9.19328
43600	43699	59.4099	9.7058
43700	43799	57.3825	9.49016
43800	43899	50.3611	10.9139
43900	43999	60.501	12.6656
44000	44099	55.5851	14.2873
44100	44199	58.8927	14.2033
44200	44299	62.6194	12.4687
44300	44399	65.0569	15.8785
44400	44499	71.2842	14.8855
44500	44599	65.5244	13.325
44600	44699	65.8463	10.0795
44700	44799	56.1844	10.896
44800	44899	69.3055	10.6126
44900	44999	43.778	8.33956
45000	45099	44.8231	9.2287
45100	45199	47.2627	9.31288
45200	45299	46.8915	8.44805
45300	45399	45.3692	8.81169
45400	45499	47.466	6.46587
45500	45599	40.4172	5.61507
45600	45699	49.7947	5.48594
45700	45799	59.523	6.92116
45800	45899	42.2895	4.69683
45900	45999	43.3911	5.79887
46000	46099	38.4796	5.1205
46100	46199	42.1279	6.49964
46200	46299	42.6047	5.99846
46300	46399	41.078	5.05944
46400	46499	35.0898	5.24488
46500	46599	41.6683	5.07415
46600	46699	37.8517	3.2853
46700	46799	50.2451	4.70247
46800	46899	45.3675	5.08553
46900	46999	42.5546	5.46181
47000	47099	33.683	3.853
47100	47199	43.4226	3.80958
47200	47299	38.8284	4.28868
47300	47399	42.8516	5.41623
47400	47499	47.2071	7.52462
47500	47599	48.5309	7.98042
47600	47699	47.5128	7.61416
47700	47799	42.5811	7.23118
47800	47899	39.5501	7.52277
47900	47999	32.4896	7.12743
48000	48099	39.0355	8.16377
48100	48199	48.3301	5.57724
48200	48299	43.1266	7.48532
48300	48399	52.7334	10.0384
48400	48499	60.1247	13.1492
48500	48599	55.5791	12.1485
48600	48699	50.4964	14.0099
48700	48799	47.9099	14.7834
48800	48899	NaN	16.5365
48900	48999	NaN	15.1881
49000	49099	NaN	12.9034
49100	49199	NaN	12.4002
49200	49299	NaN	10.0683
49300	49399	NaN	10.3213
49400	49499	60.0338	13.8741
49500	49599	56.2586	15.4001
49600	49699	64.65	16.5397
49700	49799	62.2201	15.3963
49800	49899	69.5791	13.0245
49900	49999	73.1018	12.9682
50000	50099	71.0544	11.7747
50100	50199	73.9277	13.3256
50200	50299	90.9754	13.8132
50300	50399	68.6987	12.0744
50400	50499	71.5771	11.1525
50500	50599	70.3281	11.0376
50600	50699	69.1855	9.78031
50700	50799	71.1876	11.0961
50800	50899	82.4485	9.09248
50900	50999	74.2175	9.58808
51000	51099	77.221	7.69177
51100	51199	79.1725	7.52689
51200	51299	76.5032	6.27188
51300	51399	63.8556	6.52119
51400	51499	68.4234	6.99012
51500	51599	72.8962	7.06449
51600	51699	67.2488	6.69371
51700	51799	60.0799	5.51706
51800	51899	58.9256	7.52418
51900	51999	51.6673	5.92592
52000	52099	57.4691	4.9916
52100	52199	64.6686	5.36305
52200	52299	65.0541	5.61892
52300	52399	51.3351	4.54063
52400	52499	56.5426	4.92518
52500	52599	45.4643	4.59997
52600	52699	60.2368	6.07665
52700	52799	51.7932	5.63651
52800	52899	58.8462	4.9825
52900	52999	62.967	5.35301
53000	53099	65.9814	5.95867
53100	53199	49.7353	5.12582
53200	53299	49.5742	4.956
53300	53399	46.6709	4.27651
53400	53499	55.7883	5.03206
53500	53599	55.0874	3.78062
53600	53699	57.4826	4.59837
53700	53799	45.664	4.38813
53800	53899	49.7333	4.08389
53900	53999	40.9943	3.78149
54000	54099	34.5209	3.56564
54100	54199	38.5045	3.86809

## Sheet: d15N
SPICE d15N of N2 data from Scripps Institution of Oceanography (Severinghaus, Beaudette)
Depth	Ice age	d15N
(m)	(yr BP)	permil
125.3	68.7166	0.579498
130.56	131.064	0.579123
135.52	192.249	0.56676
140.3	251.236	0.554133
165.52	575.548	0.561267
175.3	700.639	0.58032
195.49	968.746	0.572244
230.38	1423.12	0.563501
245.29	1620.66	0.559931
255.5	1759.16	0.582036
275.03	2042.04	0.579295
285.55	2198.4	0.554176
295.31	2350.48	0.53241
305.3	2497.86	0.553805
315.27	2646.26	0.569566
326.04	2810.28	0.582015
335.04	2942.97	0.591385
346.14	3103.21	0.581101
355.32	3234.87	0.590298
370.14	3448.49	0.589502
395.04	3811.7	0.592868
405.26	3963.17	0.59471
415.3	4111.86	0.594907
426.27	4273.9	0.574976
435.26	4404.89	0.584638
465.6	4838.5	0.593808
475.3	4978.4	0.608497
480.75	5055.88	0.593763
485.43	5121.83	0.588366
490.89	5200.24	0.598055
495.74	5269.81	0.601486
500.74	5342.88	0.592776
505.04	5404.2	0.586628
511.18	5487.77	0.593452
515.26	5545.86	0.594102
522	5643.49	0.598754
525.26	5686.61	0.602854
551.03	6043.75	0.59996
557.7	6136.61	0.598374
561.04	6187.29	0.60803
565.26	6251.12	0.600133
569.3	6310.88	0.600344
577.52	6436.16	0.601541
581.04	6493.15	0.592427
585.3	6559.91	0.604674
597.24	6745.33	0.574826
601.28	6807.67	0.571431
605.3	6880.04	0.573379
609.75	6957.07	0.575106
613.04	7017.96	0.57841
617.04	7086.06	0.569407
621.19	7159.77	0.564726
625.28	7230.9	0.576028
629.04	7294.26	0.570369
633.31	7370.72	0.57404
637.54	7441.24	0.570932
645.74	7585.98	0.57807
649.26	7645.59	0.579569
653.16	7712.48	0.58298
657.24	7781.44	0.574139
661.41	7849.39	0.576566
669.2	7977.09	0.590913
673.51	8049.13	0.587973
677.22	8107.24	0.599153
685.26	8233.84	0.593134
694.04	8371.12	0.601499
697.27	8420.41	0.605339
705.1	8537	0.59958
713.24	8669.34	0.602934
721.29	8802.58	0.604272
730.04	8949.97	0.596647
735.07	9043.41	0.600047
740.15	9140.12	0.583821
745.12	9231.39	0.595128
751	9346.49	0.591747
755.15	9430.31	0.604486
760.07	9530.02	0.598404
765.09	9626.79	0.594477
770.16	9725.9	0.595489
775.04	9826.75	0.586693
776.98	9864.97	0.594219
779.97	9925.56	0.601786
785.32	10032.1	0.604031
791.09	10145.1	0.595277
795.13	10225.5	0.609496
800.08	10320.5	0.611663
805.15	10420	0.609005
810.14	10518.5	0.626918
815.18	10621.9	0.627279
820.15	10717.9	0.619919
825.14	10813.9	0.627857
830.16	10907.9	0.625769
835.14	10996.6	0.613707
840.17	11085.2	0.620037
845.16	11168.4	0.615856
850.86	11262.1	0.621166
855.14	11333.7	0.619631
860.15	11419.9	0.617365
865.21	11506.9	0.618305
871.09	11607.5	0.622204
875.17	11680	0.624907
880.25	11767.8	0.615724
885.15	11853.3	0.615627
890.17	11945.9	0.601941
895.82	12059.9	0.611371
900.24	12158.1	0.610823
905.22	12276.7	0.60054
910.18	12402.1	0.595108
915.21	12533.4	0.589735
920.24	12673.4	0.575246
926.07	12844.6	0.583748
930.27	12972.3	0.590771
935.23	13127.4	0.57531
940.25	13276.4	0.572295
946.01	13449.7	0.568944
950.34	13579.4	0.569164
955.22	13730.2	0.576025
960.29	13890.1	0.570323
966.01	14065.2	0.56637
970.28	14186.4	0.578569
975.29	14313.7	0.583076
980.17	14439.9	0.591795
985.24	14581.2	0.592339
990.23	14721.2	0.578125
995.3	14869.1	0.58095
1000.17	15012.4	0.571083
1005.15	15160.8	0.578022
1010.15	15306.3	0.57846
1015.22	15453.2	0.55921
1020.27	15599.6	0.572877
1025.21	15734.3	0.582966
1030.25	15870.9	0.572386
1035.17	15996.3	0.576027
1040.2	16132.8	0.57248
1045.2	16278.7	0.564638
1050.6	16436.5	0.565258
1055.22	16570.7	0.564255
1060.21	16725.6	0.550894
1065.21	16893.2	0.526044
1070.29	17078.1	0.527089
1076.22	17318.9	0.521144
1078.07	17403.4	0.518414
1080.01	17492.7	0.520056
1082.09	17586.9	0.524703
1086.07	17765.9	0.520676
1090.09	17952.8	0.517376
1092.09	18037.3	0.517961
1094.11	18128.8	0.517824
1096.05	18220	0.531711
1098.08	18313.6	0.529769
1101.08	18449.9	0.528292
1102.14	18494.3	0.523906
1103.08	18532.6	0.532164
1104.07	18572.2	0.531685
1105.08	18613.9	0.540698
1106.1	18658.9	0.546035
1107.1	18703.7	0.546095
1108.14	18745.4	0.542154
1109.11	18786.3	0.537985
1111.11	18875.3	0.542828
1112.13	18921.1	0.545717
1113.11	18961.6	0.54763
1114.08	18999.2	0.541335
1115.08	19039	0.546033
1117.08	19132.2	0.547389
1118.07	19178.8	0.543342
1119.08	19223.7	0.551946
1120.13	19272.5	0.559911
1121.11	19319.9	0.538266
1122.1	19367.3	0.548068
1124.06	19460.1	0.55188
1125.07	19507	0.553757
1126.09	19551.5	0.547148
1128.07	19638.5	0.5411
1129.05	19681.6	0.545286
1130.08	19723.7	0.543653
1131.08	19763.9	0.544711
1132.08	19809.7	0.540308
1134.08	19900.3	0.553661
1136.08	19986.5	0.556055
1138.08	20068	0.545955
1139.18	20115.9	0.551048
1143.11	20278.1	0.533895
1144.1	20316.3	0.551118
1145.09	20358.5	0.557595
1146.08	20400.3	0.552266
1147.07	20441.2	0.565384
1148.08	20479.7	0.560489
1150.07	20556.5	0.552759
1151.16	20604.4	0.538184
1152.05	20643.1	0.54154
1154.03	20727.1	0.542403
1157.07	20871.3	0.543598
1158.08	20919.1	0.531964
1159.08	20965.9	0.532609
1161.11	21074.7	0.524874
1162.09	21127.2	0.505116
1163.08	21179	0.528039
1164.08	21233.5	0.531602
1165.06	21289.3	0.525491
1166.08	21349.5	0.514976
1167.09	21411.6	0.519395
1168.09	21472.5	0.509542
1169.11	21530.1	0.514466
1170.11	21585	0.504125
1171.1	21637.2	0.50588
1172.12	21693.5	0.50551
1173.15	21754	0.509063
1174.11	21814.8	0.505899
1175.1	21877.7	0.504459
1176.09	21941.9	0.497992
1177.13	22012.3	0.504332
1178.08	22074.2	0.498069
1179.09	22145.8	0.505358
1180.1	22216.6	0.502374
1181.09	22280.1	0.493022
1182.08	22344.6	0.493135
1183.08	22411.5	0.497705
1184.08	22479.7	0.49125
1185.08	22545.5	0.500242
1186.09	22613.6	0.503154
1187.08	22676.9	0.494907
1188.07	22740.1	0.499439
1189.08	22809.7	0.496026
1190.1	22876	0.496431
1191.08	22936.4	0.495016
1192.11	23004.3	0.500994
1193.08	23069.7	0.500709
1194.07	23138.6	0.495221
1195.08	23204.7	0.492249
1196.08	23262.6	0.493252
1197.08	23317.6	0.494534
1198.08	23375.2	0.496116
1199.08	23431.1	0.503827
1200.11	23486.1	0.513321
1201.08	23539.1	0.51041
1202.03	23594	0.504169
1203.05	23656.1	0.509376
1204.07	23718.5	0.502403
1205.08	23778	0.505308
1206.08	23832.5	0.514271
1207.09	23888.2	0.515685
1208.09	23940.4	0.520499
1209.11	23996.2	0.512759
1210.49	24076.3	0.514258
1211.13	24111.5	0.51052
1212.16	24169.6	0.511888
1213.16	24222.4	0.51915
1214.18	24275.1	0.50369
1215.18	24332.8	0.517602
1216.14	24387.5	0.518065
1217.14	24439.9	0.511225
1218.17	24495.2	0.525504
1219.13	24547.5	0.522545
1220.18	24606.1	0.519594
1221.18	24664.4	0.521809
1222.18	24719.3	0.522634
1223.16	24771.1	0.528069
1224.15	24824.8	0.520629
1225.13	24878.6	0.523632
1226.14	24938	0.529025
1227.11	25000.2	0.530419
1228.11	25067.3	0.52882
1229.09	25132.8	0.538387
1230.09	25198.7	0.543194
1231.07	25266.9	0.537573
1231.96	25327.8	0.530279
1232.96	25395.9	0.536521
1233.96	25469.8	0.542392
1234.98	25540.5	0.545419
1236.01	25613.8	0.545009
1237.04	25689	0.550684
1238.32	25778.9	0.540526
1239.08	25831.5	0.543635
1240.14	25901.4	0.539002
1241.08	25958.3	0.535081
1242.05	26012	0.534914
1243.05	26064.9	0.54003
1244.03	26115.7	0.526209
1245.07	26171.3	0.539158
1246.09	26228.1	0.544336
1247.08	26283.7	0.541795
1248.05	26343.1	0.53899
1249	26400.5	0.543407
1249.96	26453.5	0.535735
1250.98	26510.4	0.535804
1253.03	26629.5	0.539459
1254.05	26688.5	0.532369
1255.05	26745.1	0.544368
1256.07	26800.8	0.534309
1257.08	26856.8	0.547122
1258.12	26915.2	0.540659
1260.07	27024.8	0.54963
1261.06	27080.1	0.547568
1262.06	27134.8	0.540268
1263.06	27191.9	0.542535
1264.1	27255.5	0.538186
1267.08	27436.2	0.536145
1268.11	27500.2	0.541475
1269.1	27565.3	0.552642
1270.12	27633.4	0.543541
1271.08	27699.8	0.545089
1272.05	27767.4	0.548706
1273.05	27838	0.543625
1274.06	27908.2	0.542984
1275.09	27981	0.533764
1276.13	28054.1	0.538349
1277.08	28118.3	0.513504
1278.08	28185	0.530148
1279.08	28253.4	0.52642
1280.11	28326.6	0.538231
1281.08	28391.6	0.524541
1282.1	28463.6	0.538534
1283.07	28532.6	0.522986
1284.09	28603.4	0.539563
1285.05	28668.6	0.534193
1286.05	28732	0.534882
1287.04	28791.6	0.54112
1288.05	28852.1	0.549096
1289.08	28907.9	0.543937
1290.12	28958.2	0.548434
1290.97	28999.4	0.542325
1291.87	29045.3	0.550265
1292.89	29094.6	0.556483
1293.93	29147.7	0.545653
1294.95	29200.8	0.551386
1295.98	29255.8	0.554416
1297	29308.1	0.543534
1298.03	29357.8	0.54726
1299.06	29408.3	0.551475
1300.09	29457.6	0.547789
1301.1	29506.5	0.545321
1302.16	29555.3	0.549097
1303.12	29598.9	0.549399
1304.09	29642.9	0.556826
1305.09	29688.8	0.553155
1306.1	29736.6	0.549872
1307.12	29785	0.553303
1308.16	29835.7	0.560144
1309.12	29884	0.558979
1310.09	29934.2	0.560424
1311.08	29987.8	0.565029
1312.1	30043.6	0.562885
1313.21	30105.6	0.559171
1314.09	30158.2	0.566707
1315.06	30215.3	0.560168
1316.11	30276.9	0.542812
1317.01	30328.7	0.542596
1318.12	30391.9	0.551018
1319.1	30446.8	0.547784
1320.11	30502.6	0.547051
1321.1	30559	0.543324
1322.11	30617	0.544935
1323.09	30671.8	0.539758
1324.11	30731.3	0.543732
1325.1	30789.3	0.539645
1326.11	30844.6	0.545186
1327.08	30894.8	0.534218
1329.18	31006	0.534626
1330.19	31062.1	0.544257
1331.06	31112.1	0.537336
1332.06	31171.9	0.54218
1333.06	31232.7	0.546996
1334.07	31297.6	0.541765
1335.08	31363	0.551244
1336.12	31431.2	0.547309
1337.08	31497.3	0.549293
1338.08	31565.2	0.554319
1339.11	31635.8	0.552166
1340.25	31714	0.551514
1341.12	31776.9	0.541086
1341.12	31776.9	0.541086
1342.1	31847.4	0.546111
1343.1	31917.9	0.538146
1344.12	31985.9	0.540312
1345.1	32055.2	0.540594
1346.09	32124.1	0.54082
1347.04	32187.5	0.545844
1348.01	32253.3	0.536936
1349.18	32332.9	0.548647
1349.97	32384.3	0.540462
1351	32444.2	0.552266
1352.05	32500.2	0.552264
1353.05	32554.8	0.54516
1354.06	32609.2	0.552339
1355	32657.3	0.553334
1356.09	32712.3	0.552843
1357.11	32760.7	0.553542
1358.14	32806.8	0.543217
1359.14	32851.4	0.547941
1360.15	32896.9	0.545717
1361.15	32941.5	0.552916
1362.17	32986.3	0.545213
1363.11	33027.4	0.553069
1364.06	33068.2	0.53887
1365.05	33110.9	0.552628
1366.04	33154.6	0.557878
1367.08	33202.1	0.544986
1368.11	33248.3	0.555992
1368.11	33248.3	0.555992
1369.08	33290.6	0.54596
1370.1	33336.5	0.546972
1371.06	33380.2	0.551727
1372.07	33426	0.551479
1373.08	33472	0.548786
1374.11	33520.5	0.559189
1375.08	33564	0.553653
1376.06	33605.7	0.568642
1377.08	33648	0.564901
1378.16	33693.8	0.565089
1379.1	33734.7	0.569585
1380.11	33778.9	0.572158
1381.08	33819.9	0.568147
1382.1	33863.9	0.550948
1383.08	33905.1	0.567097
1384.11	33946.9	0.561354
1385.03	33983.1	0.560555
1386.15	34026.4	0.559725
1387.08	34064.2	0.560918
1388.05	34105.2	0.565006
1389.04	34147.9	0.561939
1390.04	34190.5	0.565569
1391.09	34234.4	0.565665
1392.13	34280.6	0.546865
1393.1	34326.1	0.547831
1394.08	34371	0.548504
1395.11	34419.1	0.540908
1396.14	34467.5	0.527173
1397.12	34513	0.528409
1398.11	34559.2	0.526053
1399.07	34603.1	0.529659
1400.06	34648.1	0.535096
1401.06	34693.9	0.547392
1402.09	34740.9	0.543024
1403.09	34785.6	0.540171
1404.1	34830.9	0.544134
1405.09	34879.1	0.549496
1406.09	34928.7	0.560301
1407.12	34977.6	0.543152
1408.14	35024.1	0.544456
1409.16	35069.9	0.553144
1410.41	35125.8	0.545457
1411.21	35160.7	0.547099
1412.26	35204.3	0.559537
1413.19	35246.2	0.551205
1414.15	35290.3	0.56212
1415.1	35333.9	0.556121
1416.06	35377.9	0.563854
1416.98	35420.8	0.560044
1418.07	35473.2	0.5612
1419.05	35520.8	0.555588
1420.05	35569.9	0.565848
1421.08	35620	0.566442
1422.09	35669.3	0.551239
1423.11	35719.8	0.550972
1424.13	35768.7	0.566164
1425.08	35811.9	0.569695
1426.05	35859	0.554606
1427.05	35908.9	0.565129
1428.05	35956.6	0.560699
1429.05	36005.8	0.556654
1430.07	36055.9	0.565882
1431.07	36104.5	0.560479
1432.09	36154.2	0.558041
1433.09	36203.3	0.552556
1434.12	36255.3	0.562467
1435.12	36309.2	0.560463
1436.13	36364	0.546953
1437.07	36414.1	0.554643
1438.03	36467	0.553166
1438.97	36518.8	0.555236
1440.15	36582.8	0.550199
1441.08	36633.1	0.546066
1442.1	36689.1	0.541401
1443.08	36744	0.538666
1444.08	36802.1	0.540318
1445.08	36860.5	0.534894
1446.08	36917.8	0.543969
1447.06	36973.6	0.547823
1448.06	37030	0.546378
1449.06	37085.5	0.542728
1450.09	37141.4	0.55195
1450.97	37188.6	0.542686
1452.04	37247.1	0.539063
1453.05	37301.1	0.541242
1454.1	37356	0.545587
1455.11	37408.8	0.543639
1456.15	37462.4	0.542084
1457.15	37513	0.527309
1458.18	37564.6	0.535763
1459.21	37616	0.527349
1460.24	37667.7	0.532692
1461.24	37717.3	0.546486
1462.25	37765.6	0.537389
1463.26	37813	0.540336
1464.17	37856.7	0.526818
1465.17	37904	0.530236
1466.15	37949.6	0.536
1467.16	37994.9	0.528423
1468.18	38038.4	0.528796
1469.08	38078.4	0.527771
1470.07	38119.1	0.519053
1471.08	38161.5	0.515911
1472.11	38205.1	0.519652
1473.08	38244.6	0.522867
1474.04	38281	0.510471
1475.08	38318.4	0.508751
1476.1	38356.2	0.526013
1477.06	38391	0.515868
1478.02	38425.4	0.518238
1479.32	38470.3	0.516169
1480.19	38499.2	0.510524
1481.1	38529.6	0.516952
1482.12	38564.8	0.510239
1483.1	38600.5	0.516985
1484.1	38638.8	0.508536
1485.6	38696.1	0.515584
1486.08	38714.6	0.519607
1487.1	38753.3	0.515663
1488.12	38790.6	0.516954
1489.1	38826.5	0.515941
1490.06	38862	0.514337
1491.08	38899.8	0.515311
1492.01	38933.4	0.50994
1493.01	38970.1	0.522785
1494.03	39009.5	0.525701
1495.03	39047.5	0.523503
1496.05	39085.1	0.525325
1497.04	39122.7	0.512675
1498.05	39162.4	0.524704
1499.17	39205.4	0.525445
1500.11	39240.8	0.523366
1501.11	39278.3	0.52403
1503.08	39351.9	0.516936
1504.08	39388.3	0.510816
1505.1	39427.4	0.535287
1506.11	39470.5	0.522682
1507.14	39512.8	0.516928
1508.17	39553.6	0.514491
1509.13	39591.4	0.512714
1510.1	39631.7	0.521185
1511.07	39673.8	0.520373
1512.11	39721.3	0.506856
1513.05	39766.2	0.523673
1514.07	39815.5	0.514902
1515.1	39866	0.521209
1516.12	39913.9	0.525362
1517.14	39961.8	0.509571
1518.16	40010.7	0.50981
1519.29	40061.8	0.512929
1520.22	40102.6	0.514573
1521.24	40148	0.501911
1522.26	40194.8	0.512729
1523.19	40239.1	0.526265
1524.13	40282.7	0.521794
1525.16	40329.6	0.520689
1526.21	40378.4	0.516319
1527.12	40422.2	0.513375
1528.04	40465.5	0.513879
1529.08	40511.2	0.504222
1530.11	40554	0.498741
1531.08	40593.2	0.504635
1533.11	40673.7	0.505424
1534.15	40714.4	0.504053
1535.18	40755.5	0.510778
1536.23	40797.9	0.512469
1537.16	40835.8	0.514233
1538.08	40874	0.51876
1539.11	40917.7	0.509822
1540.24	40966.1	0.508506
1541.13	41002.4	0.512461
1542.28	41047.4	0.516041
1543.28	41084.2	0.522117
1544.15	41116.5	0.523258
1545.44	41164.9	0.519347
1546.22	41191.1	0.522883
1547.23	41225	0.522365
1548.24	41259.3	0.526049
1549.23	41292.4	0.53412
1550.23	41325.9	0.532168
1551.39	41365.1	0.527256
1552.28	41395.3	0.533167
1553.25	41428.6	0.537194
1554.24	41462.8	0.541815
1555.19	41496.8	0.54432
1556.13	41532.3	0.545223
1557.09	41570.6	0.546693
1558.05	41610.9	0.541826
1559.17	41660.1	0.534708
1560.08	41702.3	0.540271
1561.09	41747.6	0.536344
1562.1	41794.2	0.526025
1563.09	41843.5	0.523988
1564.09	41893.9	0.533732
1565.06	41941.1	0.526445
1566.04	41989.7	0.522394
1567.06	42041.6	0.52276
1568.08	42095.7	0.518641
1569.05	42148.4	0.507256
1570.07	42204.4	0.510979
1571.17	42260	0.494394
1572.07	42303.8	0.500485
1573.07	42352.6	0.494349
1574.07	42401.1	0.491661
1575.09	42448.6	0.497588
1576.11	42492.9	0.4916
1577.11	42534.4	0.495345
1578.08	42573.1	0.496236
1579.18	42618.1	0.495903
1580.19	42659.1	0.497152
1581.08	42696.2	0.497037
1582.08	42739.1	0.501112
1583.06	42780.2	0.501944
1584.06	42821.6	0.499872
1585.07	42862.9	0.496229
1586.09	42906.3	0.488602
1587.08	42950.7	0.508742
1588.08	42997	0.509792
1589.09	43043.9	0.503527
1590.09	43089.7	0.50175
1591.06	43135.7	0.50749
1592.07	43184	0.512414
1593.06	43231.2	0.510002
1594.08	43280	0.511834
1595.09	43329.5	0.520485
1596.09	43381.1	0.52489
1597.09	43433.5	0.518262
1598.09	43486.1	0.517145
1599.12	43541.9	0.508122
1600.25	43604.8	0.502021
1601.17	43657.5	0.507905
1602.17	43714.9	0.510808
1603.17	43772.5	0.505716
1604.11	43826.7	0.502415
1605.09	43885	0.504206
1606.33	43956	0.505949
1607.08	43998	0.502107
1608.08	44053.6	0.492574
1609.04	44106.5	0.483114
1610.07	44163.2	0.482528
1611.13	44223.7	0.486666
1612.08	44278.9	0.474318
1613.08	44337.7	0.465544
1614.08	44396.9	0.463517
1615.44	44478.5	0.461632
1616.1	44518.4	0.469418
1617.13	44581.7	0.466172
1618.11	44640.8	0.4729
1619.21	44708.8	0.469307
1620.08	44763.9	0.465202
1620.98	44821	0.464788
1621.98	44885.8	0.473127
1622.84	44939.8	0.476145
1623.87	44999.1	0.472879
1624.9	45060	0.481507
1625.93	45123.1	0.480909
1627.26	45203	0.482032
1627.99	45246.9	0.485606
1629.02	45308.9	0.4876
1630.05	45369.9	0.49456
1631.05	45428.4	0.495809
1632.08	45490.8	0.495089
1633.08	45551.3	0.493008
1634.08	45609.9	0.500958
1635.1	45668	0.504053
1636.1	45722.4	0.498283
1637.1	45774.4	0.508353
1638.11	45826.7	0.511922
1639.22	45885.8	0.512009
1640.1	45931.4	0.512502
1641.09	45983.8	0.524546
1642.06	46038.2	0.516053
1643.06	46096.6	0.521271
1644.07	46155.3	0.526274
1645.1	46213.7	0.530048
1646.08	46269.6	0.532816
1647.07	46326.5	0.539002
1648.09	46385.2	0.53031
1649.11	46445.1	0.526384
1650.14	46504.3	0.530331
1651.17	46562.6	0.537668
1652.15	46619.1	0.532106
1653.15	46675.8	0.535035
1654.17	46731.2	0.535155
1655.19	46786.9	0.529646
1656.19	46842.1	0.532516
1657.15	46896.6	0.542451
1658.19	46955.5	0.54015
1659.22	47014.8	0.533317
1660.32	47080	0.532263
1662.19	47189.7	0.524644
1663.57	47267.2	0.536039
1664.18	47300.9	0.532623
1665.15	47354.7	0.534628
1666.13	47409.8	0.525181
1667.13	47466.8	0.531023
1668.08	47518.9	0.53168
1669.03	47565.3	0.531047
1670.03	47613.2	0.522699
1671.03	47660.7	0.526928
1671.98	47702.5	0.527361
1673.01	47747.9	0.525843
1674.04	47794.5	0.522004
1675.07	47841.7	0.527791
1676.1	47892.1	0.515071
1677.09	47945.9	0.513261
1678.09	47997.3	0.516261
1679.22	48056.5	0.513751
1680.15	48108.1	0.513802
1681.12	48163.9	0.484006
1682.1	48220.9	0.503404
1683.09	48280.6	0.493126
1684.08	48343.8	0.485259
1685.1	48411.5	0.493276
1686.13	48482.5	0.476445
1687.16	48556	0.481027
1688.43	48648	0.482196
1689.21	48704.4	0.479913
1690.22	48776.7	0.483338
1691.18	48844.7	0.483457
1692.12	48913.4	0.487824
1693.12	48987.4	0.483076
1695.08	49131.9	0.485561
1696.03	49199.5	0.495815
1697.06	49271.9	0.500852
1698.05	49340.5	0.509116
1699.08	49407.7	0.510487
1699.91	49462.1	0.506848
1701.03	49534.4	0.511019
1701.95	49590.6	0.508416
1702.92	49649	0.50638
1703.89	49705	0.505962
1704.88	49761	0.507319
1705.88	49813.9	0.510777
1706.9	49867	0.51022
1707.89	49916.6	0.513172
1708.9	49965.5	0.521618
1709.91	50014.9	0.525777
1710.93	50065.8	0.519308
1711.96	50117.3	0.51974
1712.99	50166.4	0.524926
1714	50214.1	0.528903
1714.77	50251.8	0.526307
1715.69	50295.9	0.531323
1716.61	50341	0.524333
1717.64	50390.5	0.526759
1719.04	50456.8	0.531726
1719.74	50491	0.530994
1720.62	50535.5	0.537693
1721.62	50586.5	0.533735
1722.62	50638.4	0.539758
1723.61	50689.5	0.549376
1724.61	50739.1	0.545143
1725.64	50791.3	0.539667
1726.66	50844.4	0.549722
1727.7	50898.8	0.54197
1728.73	50954.6	0.541487
1729.76	51010.8	0.54068
1730.79	51067.7	0.548386
1731.82	51124.5	0.541791
1732.85	51181.5	0.546816
1733.87	51239.4	0.543484
1734.87	51297.2	0.538636
1735.9	51359	0.543155
1736.92	51422.5	0.55071
1737.94	51485.3	0.549665
1739.04	51555.7	0.543163
1739.96	51615.2	0.546061
1740.98	51683.7	0.546197
1743	51831.5	0.547362
1744.03	51910.6	0.547876
1745.05	51990	0.541355
1746.08	52069.5	0.55248
1747.11	52151.8	0.55462
1748.12	52240.4	0.548181
1749.14	52335.3	0.548145
1751.01	52516.3	0.550792
