# Supplementary material for: The SP19 chronology for the South Pole Ice Core – Part 1: volcanic matching and annual layer counting
Source: Copernicus journal article supplement (doi:10.5194/cp-15-1793-2019), 2019-10-08
Supplement: Supplementary file [file cp-15-1793-2019-supplement-title-page.pdf › cp-15-1793-2019-supplement-title-page.pdf]

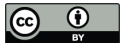

## *Supplement of*

# **The SP19 chronology for the South Pole Ice Core – Part 1: volcanic matching and annual layer counting**

**Dominic A. Winski et al.**

*Correspondence to:* Dominic A. Winski ([dominic.winski@maine.edu](mailto:dominic.winski@maine.edu))

- [cp-15-1793-2019-supplement-title-page.pdf](#)
- Supplemental Material
  - [SP19\\_Data.xlsx](#)
  - [Winski\\_SPICEcore\\_8\\_20\\_2019\\_Supplement.pdf](#)

The copyright of individual parts of the supplement might differ from the CC BY 4.0 License.
